1 **Title:** Phox2a defines a developmental origin of the anterolateral system in mice and  
2 humans

3

4 **Authors:** R. Brian Roome<sup>1,2</sup>, Farin B. Bourojeni<sup>1,2</sup>, Bishakha Mona<sup>3</sup>, Shima Rastegar-  
5 Pouyani<sup>1,2</sup>, Raphael Blain<sup>4</sup>, Annie Dumouchel<sup>1</sup>, Charleen Salesse<sup>1</sup>, W. Scott Thompson<sup>1</sup>,  
6 Megan Brookbank<sup>1</sup>, Yorick Gitton<sup>4</sup>, Lino Tessarollo<sup>5</sup>, Martyn Goulding<sup>6</sup>, Jane E.  
7 Johnson<sup>3,7</sup>, Marie Kmita<sup>1,9</sup>, Alain Chédotal<sup>4</sup> and Artur Kania<sup>1,2,8,9,#,\*</sup>

8

9 **Affiliations :**

10 <sup>1</sup>Institut de Recherches Cliniques de Montréal (IRCM), Montréal, QC, H2W 1R7,  
11 Canada

12 <sup>2</sup>Integrated Program in Neuroscience, McGill University, Montréal, QC, H3A 2B4,  
13 Canada

14 <sup>3</sup>Department of Neuroscience, UT Southwestern Medical Center, Dallas, TX, 75390,  
15 United States

16 <sup>4</sup>Sorbonne Université, INSERM, CNRS, Institut de la Vision, 17 Rue Moreau, Paris,  
17 75012, France

18 <sup>5</sup>Neural Development Section, Mouse Cancer Genetics Program, National Cancer  
19 Institute, Frederick, MD, 21702, United States

20 <sup>6</sup>Molecular Neurobiology Laboratory, The Salk Institute for Biological Studies, La Jolla,  
21 CA, 92037, United States

22 <sup>7</sup>Department of Pharmacology, UT Southwestern Medical Center, Dallas, TX, 75390,  
23 United States

24 <sup>8</sup>Department of Anatomy and Cell Biology, McGill University, Montréal, QC, H3A 0C7,

25 Canada

26 <sup>9</sup>Division of Experimental Medicine, McGill University, Montréal, QC, H3A 2B2,

27 Canada

28 <sup>#</sup>Lead contact

29 <sup>\*</sup>Correspondence: [artur.kania@ircm.qc.ca](mailto:artur.kania@ircm.qc.ca)

30 **Summary:**

31

32 Anterolateral system neurons relay pain, itch and temperature information from the spinal  
33 cord to pain-related brain regions, but the differentiation of these neurons and their  
34 specific contribution to pain perception remain poorly defined. Here, we show that  
35 virtually all mouse spinal neurons that embryonically express the autonomic system-  
36 associated Paired-like homeobox 2A (Phox2a) transcription factor innervate nociceptive  
37 brain targets, including the parabrachial nucleus and the thalamus. We define Phox2a  
38 anterolateral system neuron birth order, migration and differentiation, and uncover an  
39 essential role for Phox2a in the development of relay of nociceptive signals from the  
40 spinal cord to the brain. Finally, we also demonstrate that the molecular identity of  
41 Phox2a neurons is conserved in the human foetal spinal cord. The developmental  
42 expression of Phox2a as a uniting feature of anterolateral system neurons suggests a link  
43 between nociception and autonomic nervous system function.

44 **Introduction:**

45 In vertebrates, somatosensory information about noxious stimuli is carried from  
46 peripheral nociceptors to the brain, via spinal projection neurons collectively known as  
47 the anterolateral system (AS). Together the brain regions innervated by these interpret the  
48 transmitted signals as pain, a sensation endowed with discriminative and affective  
49 components that, respectively, convey the identity, location, and intensity of the stimulus,  
50 as well as elicit behavioural responses driven by arousal and aversion (Melzack and  
51 Casey, 1968). Anatomical, clinical and physiological studies suggest that dedicated AS  
52 channels convey these different facets of pain (Price and Dubner, 1977), but since the  
53 molecular identity of AS neurons remains unknown, insights into the functional logic of  
54 nociceptive information relay from the periphery to the brain remain limited.

55

56 The AS innervates brain regions that have distinct functions in nociception.  
57 Prominent targets include the ventroposterolateral thalamus (VPL) (Gauriau and Bernard,  
58 2004; Willis et al., 1979), which relays somatotopically organised nociceptive  
59 information (Guilbaud et al., 1980) to the primary somatosensory cortices, and the  
60 parabrachial nucleus (pB) (Bernard et al., 1995), which is considered to mediate affective  
61 components of pain by relaying noxious information to the amygdala (Han et al., 2015),  
62 and via the medial thalamus, to the prefrontal cortex (Bourgeois et al., 2001). Clinical  
63 evidence supports the division between discriminative and affective dimensions of pain,  
64 as prefrontal lobotomy (Freeman and Watts, 1948) and insular cortex-related pain  
65 asymbolia (Berthier et al., 1988; Rubins and Friedman, 1948) result in the discriminatory  
66 nature of noxious stimuli being appreciated in the absence of the negative affect normally

67 associated with them. The critical role of AS in relaying both discriminative and affective  
68 components of nociception to its brain targets is revealed by effects of lesions to the  
69 spinal anterolateral tract, which abolish all somatic pain without affecting light touch  
70 sensibility (Spiller and Martin, 1912).

71

72 The anatomy of AS neurons is well known in rodents, where they are found  
73 principally in laminae I and V and the lateral spinal nucleus (LSN) of the spinal dorsal  
74 horn (Davidson et al., 2010; Kitamura et al., 1993). Lamina I AS neurons have small  
75 receptive fields (Willis et al., 1974) and respond to specific classes of stimuli and their  
76 modalities (e.g.: temperature, itch, mechanical vs. thermal pain (Andrew and Craig, 2001;  
77 Craig and Serrano, 1994), which are relayed to targets thought to mediate discriminatory  
78 responses such as the VPL thalamus. Lamina V/LSN AS neurons, in contrast, have broad  
79 receptive fields, wide dynamic ranges of receptivity (Craig, 2003b), and their physiology  
80 corresponds poorly with the qualitative descriptions of pain (Craig, 2004). Based on their  
81 prominent projections to the dorsal pB (Feil and Herbert, 1995) and medial thalamus  
82 (Gauriau and Bernard, 2004), lamina V/LSN neurons likely transmit the affective and  
83 motivational dimensions of pain. These AS neuron functions are in line with substance-P  
84 receptor (NK1R)-directed AS neuron ablation resulting in analgesia; however, a precise  
85 interpretation of this experiment is obscured by NK1R expression in non-AS neurons  
86 (Cameron et al., 2015; Mantyh et al., 1997). Recently developed genetic tools have  
87 advanced our understanding of afferent pathways to AS neurons by uncovering the  
88 identity of interneurons that gate transmission of innocuous sensations to AS neurons  
89 (Duan et al., 2014; Petitjean et al., 2019), but genetically targeting AS neurons has been

90 difficult. A recent study using the gene *Tachykinin1* (*Tac1*) demonstrated ablation of a  
91 subset of spinal interneurons and pB-innervating AS neurons (Huang et al., 2019),  
92 producing behavioural deficits consistent with the loss of supraspinal transmission of  
93 nociceptive information without affecting the function of spinal nocifensive reflexes,  
94 demonstrating that Tac1-positive neurons contribute to the AS. Despite these advances,  
95 the genes expressed selectively in AS neurons remain unknown, precluding insights into  
96 how AS neuron function contributes to the experience of pain.

97

98       Much of the diversity of spinal neurons arises from a molecular logic of  
99 developmental gene expression that is no longer apparent in the adult nervous system.  
100 Developmental gene expression has been instrumental in studying locomotor circuits of  
101 the ventral spinal cord (Arber, 2012; Goulding, 2009), and may be also useful in  
102 accessing dorsal spinal cord somatosensory circuits. Like the ventral spinal cord, the  
103 developing dorsal horn is divided into discrete neural precursor domains via the  
104 expression of specific transcription factors that control their identities, but whose link to  
105 adult neuronal classes remains obscure (Lai et al., 2016). Whereas some spino-thalamic  
106 neurons express the transcription factor LIM homeobox transcription factor 1b (*Lmx1b*)  
107 (Szabo et al., 2015), a marker of the dI5 spinal progenitor domain, so do many dorsal  
108 horn interneurons. In contrast, the Paired-like homeobox 2a (*Phox2a*) transcription factor  
109 is a more selective marker of developing dI5 neurons, although its transient expression  
110 prevents investigation of their adult function (Ding et al., 2004). Interestingly, *Phox2a*  
111 and its close relative *Phox2b* are required for the development of the autonomic nervous  
112 system (Pattyn et al., 1997), with *Phox2a* being required for the formation of the locus

113 coeruleus (Brunet and Pattyn, 2002; Morin et al., 1997). Since AS neurons have been  
114 proposed to subserve autonomic nuclei of the CNS (Craig, 1996), we considered whether  
115 developmental Phox2a expression may be their uniting feature.

116

117       Here, using genetic fate mapping, we report that transient embryonic expression  
118 of Phox2a in spinal neurons defines the identity of several AS projection neuron classes.  
119 Using this insight, we reveal a developmental diversity of AS neurons and show that a  
120 loss of Phox2a impairs AS neuron innervation of their brain targets, resulting in  
121 attenuated supraspinal responses to noxious stimuli. Furthermore, we show that the  
122 molecular identity of Phox2a AS neurons is conserved in the developing human spinal  
123 cord, suggesting an evolutionarily conserved molecular logic of AS function.

124 **Results:**

125

126 **Spinal Phox2a<sup>Cre</sup> neurons reside in lamina I, V and LSN**

127 Mouse *Phox2a* and its proxy, BAC transgene *Phox2a<sup>GFP</sup>* are expressed embryonically  
128 and perinatally in the superficial and deep dorsal horn, where many AS neurons reside  
129 (Allen Institute for Brain Science, 2008; GENSAT, 2008). In order to label the adult  
130 descendants of these neurons, we created the transgenic *Phox2a<sup>Cre</sup>* mouse line by  
131 inserting a Cre-polyA minigene into the BAC RP23-333J21 (GENSAT, 2008), at the  
132 *Phox2a* ATG codon (Fig. 1A), and assessed Cre expression via the Cre-dependent  
133 tdTomato reporter *R26<sup>LSL-tdT</sup>* (Ai14). Adult *Phox2a<sup>Cre</sup>*; *R26<sup>LSL-tdT</sup>* mice showed tdTomato  
134 (tdT) expression throughout the rostrocaudal length of the spinal cord in dorsal horn  
135 neurons, principally in lamina I (Fig. 1B) and lamina V/Lateral Spinal Nucleus (LSN;  
136 Fig. 1B, S1A), as well as in spinal accessory nerve (mXI) motor neurons (Fig. S1A).  
137 Although rare, large “antenna”-like neurons were also found in laminae III/IV (Fig. S3)  
138 (Marshall et al., 1996; Schoenen, 1982), which have been shown to receive a wide range  
139 of primary afferent inputs (Fernandes et al., 2018). *Phox2a* is expressed in embryonic day  
140 (e) 11.5 spinal cords, within the dI5 cardinal spinal neuron domain. At this age in  
141 *Phox2a<sup>Cre</sup>*; *R26<sup>LSL-tdT</sup>* spinal cords, 91% of tdT+ cells co-expressed *Phox2a*, while at  
142 e16.5, as *Phox2a* expression begins to wane, this proportion decreased to 76% and then to  
143 0% in adults (Fig. 1C, 1D). Conversely, at e11.5, 74% of all *Phox2a* cells co-expressed  
144 tdT, and this proportion decreased to 45% by e16.5. This low co-expression is primarily  
145 accounted for by lamina V/LSN *Phox2a+* (*Phox2a<sup>Deep</sup>*) cells, 33% of which expressed  
146 tdT, in contrast to lamina I neurons (*Phox2a<sup>LamI</sup>*) for which this fraction was 82% (Fig.



147 1C,E). Similar proportions were observed at e18.5 (Fig. S1B), arguing against a delayed  
148 onset of Cre expression in  $Phox2a^{Deep}$  neurons. Together, these data constitute evidence  
149 that  $Phox2a^{Cre}$  can be used to trace the fate of Phox2a-expressing spinal neurons and is a  
150 potential genetic tool for AS neuron manipulation.

151

### 152 **Spinal $Phox2a^{Cre}$ neurons innervate AS targets**

153 To reveal the connectivity of spinal  $Phox2a^{Cre}$  neurons, we restricted  $Phox2a^{Cre}$ -driven  
154 reporter expression to the spinal cord using the Cre-Flp recombinase-dependent reporter  
155  $R26^{FSF-LSL-tdT}$  (Ai65) combined with the caudal neural tube-specific Flp recombinase  
156 driver  $Cdx2^{FlpO}$  to generate  $Phox2a^{Cre}; Cdx2^{FlpO}; R26^{FSF-LSL-tdT}$  mice ((Britz et al., 2015)  
157 Fig. 2A). To validate this genetic intersection, we compared cellular tdT reporter  
158 expression between adult  $Phox2a^{Cre}; R26^{LSL-tdT}$  (Fig. 2B–F, Fig. S2E–H) and  $Phox2a^{Cre};$   
159  $Cdx2^{FlpO}; R26^{FSF-LSL-tdT}$  mice (Fig. 2B'–F', Fig. S2E'–H'). In the brain,  $Phox2a^{Cre}$  drove  
160 cellular tdT expression in motor and autonomic nuclei (Fig. 2B–E, S2A–H), which was  
161 not observed in  $Phox2a^{Cre}; Cdx2^{FlpO}; R26^{FSF-LSL-tdT}$  mice (Fig. 2B'–E', S2E'–H'). In the  
162 caudal spinal cord of  $Phox2a^{Cre}; Cdx2^{FlpO}; R26^{FSF-LSL-tdT}$  mice however, the cellular  
163 expression of tdT+ expression was preserved (Fig. 2F, F'), allowing us to map Phox2a-  
164 expressing neuron axonal trajectories and brain targets.

165 In  $Phox2a^{Cre}; Cdx2^{FlpO}; R26^{FSF-LSL-tdT}$  mice, tdT+ axons were observed in the  
166 lateral funiculus in a similar distribution to previous reports of lamina I spinofugal axon  
167 locations (Apkarian et al., 1985; McMahon and Wall, 1983) (Fig. 2E'). We observed  
168 tdT+ axons in known AS targets such as the globus pallidus (Fig. 2G), VPL and posterior  
169 (Po) thalamus (Fig. 2H, S2I), mediodorsal thalamus (MD, Fig. 2I), the posterior

170 triangular thalamus (PoT) and anterior pretectal nucleus (Fig. S2K), the deep layers of the  
171 superior colliculus, possibly within the orientation barrels (Masullo et al., 2019) (Fig. 2J),  
172 periaqueductal gray (PAG) (Fig. 2K), the pB, (Fig. 2M, N), the nucleus of the solitary  
173 tract (Fig. 2P), the locus coeruleus (Fig. 2C') and the caudal ventrolateral medulla  
174 (CVLM) (Fig. 2D'). These termini contained the presynaptic marker vGluT2 suggesting  
175 that they contained glutamatergic synapses (Fig. 2Q, Q'). Within the pB, the dorsal-  
176 lateral (pBdl), central-lateral (pBcl), internal-lateral (pBil) subnuclei and regions  
177 surrounding the external-lateral (pBel) contained many tdT+ axons, while the superior-  
178 lateral (pBsl) and medial (pBm) subnuclei contained fewer axons (Fig. 2M, N, Fig. S2M,  
179 N). Consistent with previous reports, the pBel received very limited spinal innervation  
180 (Fig. 2N, S2E, S2N; (Bernard et al., 1995)). Additionally, spinal Phox2a<sup>Cre</sup> axons were  
181 also seen in brain regions not previously thought to receive direct AS innervation, such as  
182 the granular layers of the cerebellum (Fig. 2L), the vestibular nuclei, (Fig. 2O), the  
183 posterior hypothalamus near the A11 dopaminergic cell group (Fig. S2J), and a region of  
184 the retrorubral area / dorsomedial substantia nigra (Fig. S2L). Thus, spinal Phox2a  
185 neurons innervate brain regions predominantly involved in autonomic regulation and  
186 homeostasis such as the pBdl, the nucleus of the solitary tract (NTS) and CVLM, as well  
187 as nociceptive areas (VPL, PAG, pBil). The identities of these targets suggest that spinal  
188 Phox2a neurons may orchestrate a wide range of pain-related and autonomic responses.

189

### 190 **Spinal Phox2a neurons are predominantly AS neurons**

191 We next considered whether Phox2a expression could be the feature uniting the  
192 morphologically, anatomically and physiologically diverse classes of AS neurons. Thus,

193 we determined the fraction of AS neurons retrograde labelled from their principal targets  
194 that also expressed tdT (referred to as *Phox2a<sup>Cre</sup>* neurons). We focused our analysis on  
195 the VPL thalamus and the pB, whose tracer injections results in efficient labelling of their  
196 afferent AS neurons. Adult *Phox2a<sup>Cre</sup>; R26<sup>LSL-tdT</sup>* mice of both sexes were injected  
197 unilaterally with fluorogold (FG) in the VPL thalamus (Fig. 3A), and with CTb-488 in  
198 the pB (Fig. 3B). After 7 days, we examined the proportion of spinal neurons labelled  
199 with either or both tracers (Tracer+) that were also tdT+, sampled at all spinal cord levels  
200 (1023 FG+, 6620 CTb-488+ and 3345 tdT+ cells from 7 mice), although we focussed our  
201 analysis on the cervical spinal cord, as spino-thalamic neurons are relatively sparse in the  
202 mouse caudal spinal cord (Davidson et al., 2010). Overall, *Phox2a<sup>Cre</sup>* labelled similar  
203 ratios of AS neurons traced from the VPL and the pB (26.9±5.0 % and 19.7±4.3 %,  
204 respectively, n=7), and, in a separate experiment, the MD thalamus (22.8±2.5 %; Fig. S3,  
205 n=3). These results corroborated the genetic anterograde tracing experiments and  
206 formally demonstrate that developmental *Phox2a* expression is a feature of many AS  
207 neurons.

208

209         Since *Phox2a* expression did not correlate strongly with AS neuron target identity,  
210 we next examined whether it may be linked to AS neuron laterality or laminar position.  
211 Overall, *Phox2a<sup>Cre</sup>* labelled 16% of ipsilateral and 23% of contralateral Tracer+ neurons  
212 (Fig. 3C), with similar fractions labeled from the VPL and pB (Fig. 3D). A two-  
213 dimensional distribution of *Phox2a<sup>Cre</sup>* labelled AS neurons demonstrated a concentration  
214 in the contralateral lamina I (Fig. 3E, F) where high rates of co-localization occurred, in  
215 contrast to lamina V/LSN (Fig. 3E, G) where neurons were frequently seen labeled only

216 with retrograde tracer. Indeed, tracer labelled neurons expressing tdTomato were far less  
217 frequent in lamina V/LSN (Fig. 3H, I) than lamina I (Fig. 3J, K), likely due to *Phox2a*<sup>Cre</sup>  
218 underreporting *Phox2a* expression in deep laminae. Together, these data demonstrate that  
219 *Phox2a*<sup>Cre</sup> expression defines approximately 20% of all spino-thalamic and spino-  
220 parabrachial AS neurons, and approximately half of AS neurons in the superficial dorsal  
221 horn. Additionally a strong tdT expression bias in contralaterally projecting lamina I AS  
222 neurons, many of which are organised somatotopically, suggests that many *Phox2a*<sup>Cre</sup>  
223 neurons are involved in the localisation of noxious stimuli (Fig. 3K).

224

225 We next quantified the fraction of tdT+ neurons that contribute to the AS. We  
226 speculated that if all *Phox2a*<sup>Cre</sup> neurons were AS neurons, then a highly efficient tracer  
227 injection would result in tracer accumulation in all tdT+ neurons. In our most  
228 comprehensive injections of tracer into the pB and VPL, we reached a labelling ceiling of  
229 ~80% of lamina V/LSN tdT+ neurons bilaterally and as much as 100% of lamina I tdT+  
230 neurons, strongly suggesting that all spinal *Phox2a*<sup>Cre</sup> neurons give rise to the AS (Fig.  
231 3L–N). Given the heterogeneity of LSN neuron targets (Leah, 1988), it is likely that the  
232 tdT+ neurons in the LSN unlabelled by the tracers project to AS targets other than the  
233 VPL or the pB. Among lamina I and lamina V/LSN neuron types, smaller fractions were  
234 labelled by tracer injection into to pB or VPL suggesting *Phox2a*<sup>Cre</sup> neurons represent a  
235 variety of projection types (Fig. 3L vs Fig. S3C, D). The efficiency of tracer labelling of  
236 the rare antenna and lamina X tdT+ neurons was too low to quantify with confidence,  
237 although they predominantly to project contralaterally (Fig. S3G–K). We also examined  
238 spinal projections to the MD thalamus via retrograde tracer injection, which labelled

239 much fewer neurons than pB/VPL injections, but also included tdT+ neurons (Fig. S3L–  
240 R). In the hindbrain, pB, VPL and MD retrograde tracer injections also labelled tdT+  
241 neurons in the CVLM, parvocellular reticular nucleus and spinal trigeminal lamina I /  
242 paratrigeminal region, suggesting these  $Phox2a^{Cre}$  neurons share axonal targets and  
243 perhaps functions with spinal  $Phox2a^{Cre}$  neurons. Together, our data demonstrate that  
244 spinal tdT ( $Phox2a^{Cre}$ ) expression is a nearly exclusive label of AS neurons.

245

### 246 **Heterogeneity of spinal Phox2a neuron migration, sensory afferent interaction and** 247 **birth time**

248 To gain insights into the functional diversification of Phox2a AS neurons implied by their  
249 dorsal horn laminar location and connectivity, we turned to the cellular and molecular  
250 events underlying their development. We first asked whether the laminar distribution of  
251 Phox2a neurons is a consequence of radial migration, typical of laminated CNS  
252 structures. We examined this possibility by following Phox2a and tdT expression in  
253  $Phox2a^{Cre}; R26^{LSL-tdT}$  spinal cords throughout embryonic development. The first Phox2a  
254 neurons appear at e10.5 in the cervical region and begin expressing tdT one day later  
255 (Fig. 4A). At e12.5, three Phox2a populations are evident: Phox2a+ tdT+ ( $Phox2a^{Lami}$ )  
256 neurons ventrolateral to the nascent dorsal horn, and two medial populations consisting of  
257 Phox2a+ tdT+ and those expressing tdT alone. At e13.5,  $Phox2a^{Lami}$  neurons disperse on  
258 the surface of the nascent superficial dorsal horn in a tangential orientation, while deeper  
259 Phox2a neurons ( $Phox2a^{Deep}$ ) acquire distinct positions that correlate with tdT expression:  
260  $Phox2a^{Deep}$  tdT+ neurons remained ventrolateral to the dorsal horn, while  $Phox2a^{Deep}$  tdT-  
261 neurons accumulated above the central canal. At e14.5,  $Phox2a^{Deep}$  tdT- neurons

262 translocate laterally and eventually become intermingled with Phox2a<sup>Deep</sup> tdT+ neurons at  
263 e15.5, achieving their final configuration (Fig. S4A). Collectively we are able to identify  
264 three distinct migratory paths of Phox2a neurons based on their Phox2a<sup>Cre</sup> expression.  
265

266 As the tangential dispersal of Phox2a<sup>Lami</sup> neurons within the dorsal horn occurs at  
267 the time of primary afferent innervation of this domain, we asked how these two events  
268 are related. In e12.5 *Phox2a<sup>Cre</sup>; R26<sup>LSL-tdT</sup>* spinal cords, prior to their entry into lamina I,  
269 *Phox2a<sup>Cre</sup>* neurons project tdT+ processes towards the dorsal root entry zone, the arrival  
270 site of sensory afferent axons that eventually synapse with AS neurons (S4C,D). At  
271 e13.0, at the onset of Phox2a<sup>Lami</sup> neuron migration into lamina I (Fig. 4B), such tdT+  
272 processes were found in close apposition to TrkA+ nociceptive primary afferent axons  
273 (Fig. 4B', S4B', S4B''), which enter the superficial dorsal horn, and eventually surround  
274 Phox2a<sup>Lami</sup> neurons (Fig. S4E, S4F). To determine whether TrkA+ axons contribute to  
275 Phox2a<sup>Lami</sup> neuron positioning, we examined the location of Phox2a neurons in *TrkA*-null  
276 (*TrkA<sup>-/-</sup>*) mouse embryos, in which most TrkA+ primary afferents are absent (Smeyne et  
277 al., 1994). Compared to controls, the number of Phox2a<sup>Lami</sup> neurons in *TrkA<sup>-/-</sup>* embryos  
278 was approximately halved in the superficial dorsal horn (Fig. 4C–E), suggesting that the  
279 interplay between nociceptive afferents and their eventual synaptic targets is functionally  
280 important. In contrast, although we found no significant effects of TrkA+ axon loss on  
281 Phox2a<sup>Deep</sup> neuron count, it tended to increase, consistent with Phox2a<sup>Lami</sup> neurons'  
282 failure to migrate (Fig. 4C–E; data not shown).

283

284 To determine whether spinal Phox2a neuron diversity and migration patterns  
285 correlate with the time of their birth, we injected pregnant *Phox2a<sup>Cre</sup>; R26<sup>LSL-tdT</sup>* mice  
286 with Bromodeoxyuridine (BrdU) at e9.5, 10.5 and e11.5, and examined strong BrdU co-  
287 staining with Phox2a or tdT in e16.5 *Phox2a<sup>Cre</sup>; R26<sup>LSL-tdT</sup>* embryos (Fig. 4F–M). Nearly  
288 all Phox2a<sup>LamI</sup> neurons were born at e9.5, while Phox2a<sup>Deep</sup> neurons were born between  
289 e9.5 and e10.5. Very few neurons of either type were born at e11.5 suggesting that by  
290 that age, all Phox2a AS neurons have been born. Furthermore, examination of e11.5  
291 embryos labelled with BrdU at e9.5 or e10.5 revealed that e11.5 Phox2a neurons are  
292 predominantly born at e9.5; this, together with our migration analysis and e16.5  
293 birthdating, supports the notion that the earliest Phox2a neurons to appear become  
294 Phox2a<sup>LamI</sup> neurons (Fig. S4G–M). Taking advantage of the differential expression of  
295 Phox2a and tdT in Phox2a<sup>Deep</sup> cells, our data argue that Phox2a<sup>LamI</sup> and antenna neurons  
296 are born first, followed by Phox2a<sup>Deep</sup> tdT+ (Phox2a<sup>DeepEarly</sup>), while Phox2a<sup>Deep</sup> tdT-  
297 neurons are born last (Phox2a<sup>DeepLate</sup>) but not beyond e11.5 (Fig. S4N–Q). Thus, spinal  
298 Phox2a neuron birthdate correlates with their migration trajectory and defines a distinct  
299 set of AS neuron types (Fig. 4N). More generally, our data argue against previous  
300 conclusions that AS neurons are born concurrent with dorsal horn neurons (Nornes and  
301 Carry, 1978), and show that AS neurons constitute one of the earliest-born spinal neuron  
302 populations (Fig. S4R–T).

303

### 304 **The molecular identity and specification of spinal Phox2a neurons**

305 To uncover the molecular pathways controlling Phox2a AS neuron specification, we  
306 studied their expression of neuronal identity determinant genes, identified transcription

307 factor programs that specify them, and sought molecular markers that subdivide them.  
308 Spinal Phox2a expression begins at e9.5 in accessory motor neurons (Fig. S5A–D), likely  
309 the precursors of e10.5 cervical spinal cord Phox2a+ neurons that co-express Phox2b and  
310 Isl1. Non-motor neuron Phox2a expression is first visible at e10.5 in post-mitotic neurons  
311 expressing the cardinal dI5 transcription factor Lmx1b, adjacent to dorsal interneuron (dI)  
312 progenitors expressing the *Ascl1* or *Pax7* transcription factors, (Fig. 5A–D, M).  
313 Phox2a/Lmx1b neurons also express the dI5 transcription factors Lbx1, Tlx3, and  
314 Brn3b/Pou4F2 but not the dI1, 3, 4/6 transcription factors Lhx2, Isl1, or Pax2,  
315 respectively (Fig. 5E–J, M). Phox2a/Lmx1b neurons also express the commissural  
316 neuron guidance receptors Robo3 and DCC (Fig. 5K–M). These findings were largely  
317 similar at e11.5, when first tdT+ cells appear in Phox2a+ dI5 neurons of *Phox2a<sup>Cre</sup>*;  
318 *R26<sup>LSL-tdT</sup>* spinal cords (Fig. S5E–O) demonstrating that non-motor neuron spinal Phox2a  
319 cells are predominantly commissural dI5 neurons.

320

321         Since spinal Phox2a neurons are develop from dI5 embryonic neurons, and dI5  
322 neuron identity is specified by the bHLH (basic helix-loop-helix) transcription factor  
323 *Ascl1* while *Ptf1a* suppresses dI5 identity and induces the neighbouring dI4 identity  
324 (Glasgow et al., 2005; Helms et al., 2005), we assessed whether Phox2a expression was  
325 altered in *Ascl1* null (*Ascl1<sup>GFP/GFP</sup>*) and *Ptf1a* null (*Ptf1a<sup>CRE/CRE</sup>*) e11.5 and e14.5 spinal  
326 cords. Compared to littermate controls, virtually no Phox2a neurons were found in e11.5  
327 *Ascl1<sup>GFP/GFP</sup>* spinal cords while additional Phox2a neurons were found in e11.5 and e14.5  
328 *Ptf1a<sup>CRE/CRE</sup>* embryos (Fig. 5N–Q, S5P, S5Q). To determine whether *Ascl1* and *Ptf1a*  
329 transcription factors control Phox2a expression directly or indirectly, we analysed ChIP-



330 seq data (Borromeo et al., 2014) for *Ascl1* and *Ptf1a* binding to the *Phox2a* locus. A  
331 genomic region (*ePhox2a*) located >30 kb downstream of the *Phox2a* transcription start  
332 site was bound by *Ascl1* and *Ptf1a*, although no binding was detected for the *Ptf1a* co-  
333 factor *Rbpj* or *Prdm13*, both of which act to repress *dI5* and promote *dI4* identity (Fig.  
334 S5R; (Chang et al., 2013; Hori et al., 2008)). To test the ability of *Ascl1*, *Ptf1a* and  
335 *Prdm13* to regulate *Phox2a* through *ePhox2a*, we co-electroporated plasmids encoding  
336 these proteins together with a plasmid containing an *ePhox2a* activity reporter  
337 (*ePhox2a:GFP*; Fig. S5S) into chick spinal neuron progenitors and monitored GFP  
338 expression. *ePhox2a:GFP* alone directed GFP expression in a small number of neurons  
339 located within the *dI5* domain (Fig. 5R, S5T), supporting its function as a *dI5*-specific  
340 enhancer. Ectopic *Ascl1*, but not ectopic *Ptf1a*, dramatically increased the number of  
341 GFP+ cells (Fig. 5S, T). Furthermore, consistent with the absence of *Prdm13* binding to  
342 *ePhox2a*, the increase in GFP numbers by *Ascl1* expression was not suppressed by  
343 *Prdm13* (Fig. 5U). Furthermore, *Phox2a* expression was entirely abolished in *Lmx1b*<sup>-/-</sup>  
344 e11.5 mouse neural tubes (Fig. S5U). Together, these data suggest that *Ascl1* and *Lmx1b*  
345 are required for *Phox2a* expression and *Ascl1* acts directly through a distal 3' enhancer.  
346 In contrast, *Ptf1a* represses *Phox2a* transcription, likely through indirect mechanisms  
347 (Fig. 5V).

348

349         Given that *Phox2a* labels a set of AS neurons, we sought to identify other genes  
350 expressed preferentially within AS neurons using available single cell RNA-Seq data  
351 from e9.5-e13.5 mouse spinal cords (Delile et al., 2019). Since *Phox2a* neurons are a  
352 subset of *Lmx1b*-expressing *dI5* neurons, we performed UMAP dimensionality reduction

353 analyses on two cohorts of Lmx1b<sup>+</sup> neurons: 1) those found at all time points (e9.5–  
354 e13.5) to maximize statistical power for finding differentially expressed AS genes (2614  
355 neurons, Fig. 5W) and 2) an earlier subset of Lmx1b neurons from e9.5–e11.5 spinal  
356 cords (186 neurons, Fig. 5Y) to attempt to separate early dI5 neurons (pre-lamina I  
357 neurons) into subsets. From both data sets, we were able to isolate a cluster of Lmx1b  
358 neurons enriched for Phox2a<sup>+</sup> neurons (Fig. 5X, 5AA, S5V, S5W), as well as an early  
359 Lmx1b<sup>+</sup> cluster enriched for Tac1, a marker for a previously identified neuronal  
360 population containing interneurons and AS neurons (Fig. 5Z, S5W). Top enriched  
361 transcripts for each cluster are listed in Table S1. Selected candidate transcripts enriched  
362 in clusters containing Phox2a<sup>+</sup> neurons versus all other neurons were validated using  
363 immunohistochemistry and *in situ* mRNA detection, in e11.5 and e16.5 spinal cords. At  
364 e11.5 Phox2a neurons were enriched for the expression of *Nms*, *Tm4sf4*, *Scn9a*, and *Zim1*  
365 mRNAs (Fig. 5BB–HH), which remained expressed in e16.5 Phox2a<sup>Lami</sup> neurons (Fig.  
366 5II–OO), providing further support that the early Phox2a cells populate the superficial  
367 dorsal horn. Other dI5-enriched transcripts and proteins, *Syt4*, *Pdzrn3*, *Shox2* and  
368 Pou6F2, were also highly co-expressed with Phox2a, but were less specific to Phox2a  
369 neurons (Fig. S5X–EE). Thus, in addition to identifying molecular markers of Phox2a  
370 neuron subpopulations, our analyses point to non-overlapping expression of *Phox2a* and  
371 *Tac1* in early Lmx1b neurons (likely lamina I-destined) as a potential molecular division  
372 of superficial dorsal horn AS neurons. Together, these experiments reveal the cellular and  
373 molecular mechanisms of AS neuron specification and unravel an array of AS-enriched  
374 mRNAs.  
375

376 **Phox2a is required for AS neuron development**

377 Given the requirement of Phox2a for normal locus coeruleus development (Morin et al.,  
378 1997), we hypothesised that its loss may also impact the development of spinal Phox2a  
379 neurons. As *Phox2a* null mice do not survive beyond birth, we used the *Hoxb8<sup>Cre</sup>* driver  
380 to ablate *Phox2a* selectively in the caudal spinal cord (Fig. S6A (Witschi et al., 2010)),  
381 producing Phox2a<sup>cKO</sup> (*Hoxb8<sup>Cre</sup>; Phox2a<sup>ff</sup>*) and control (*Phox2a<sup>ff</sup>* or *Hoxb8<sup>Cre</sup>; Phox2a<sup>+/+</sup>*)  
382 adult mice. To determine whether Phox2a plays a role in AS connectivity, we  
383 genetically labelled spinofugal axons by crossing the axonal tdTomato Cre reporter  
384 *R26<sup>LSL-tdT</sup>* into Phox2a<sup>cKO</sup> and control lines, generating, respectively, (*Hoxb8<sup>Cre</sup>; Phox2a<sup>ff</sup>; R26<sup>LSL-tdT</sup>*)  
385 and (*Hoxb8<sup>Cre</sup>; Phox2a<sup>+/+</sup>; R26<sup>LSL-tdT</sup>*) mice. While most spinofugal target  
386 nuclei appeared to be normally innervated in *Phox2a<sup>cKO</sup>* mice (Fig. S6B), a dramatic loss  
387 of tdT axons in the pBil was observed (Fig. 6A, B). To examine this defect in more  
388 detail, we injected a retrograde tracer into the pB of control and Phox2a<sup>cKO</sup> mice (Fig.  
389 S6C), and quantified the number of tracer+ lamina I and lamina V/LSN neurons in the  
390 cervical and lumbar spinal cord which are, respectively, rostral to and within the  
391 *Hoxb8<sup>Cre</sup>* expression domain. In the upper cervical spinal cord, we found a similar  
392 number of Tracer-labelled lamina I and lamina V/LSN neurons in both groups (Fig. S6D-  
393 F). In contrast, in the caudal spinal cord, while Tracer-labelled lamina I neuron number  
394 was unchanged in Phox2a<sup>cKO</sup> mice (Fig. 6C, D), the number of Tracer+ ipsilateral and  
395 contralateral lamina V/LSN neurons was dramatically decreased (Fig. 6C, E). To  
396 investigate cellular changes leading to these connectivity phenotypes, we analysed  
397 *Phox2a* mRNA in e16.5 control and Phox2a<sup>cKO</sup> embryos. *Phox2a* mRNA could be  
398 detected in Phox2a<sup>cKO</sup> embryos, likely due to persistence of the truncated *Phox2a*

399 transcript, and revealed similar numbers of Phox2a neurons in control and Phox2a<sup>CKO</sup>  
400 e16.5 mice (12.6±3.7 cells/section, n=4, and 16.6±1.5 cells/section, n=4, respectively,  
401 p=0.089 unpaired t-test) although Phox2a<sup>Deep</sup> neurons were displaced medially (Fig. 6H,  
402 I), arguing that these cells do not die but are dysfunctional. *Phox2a* mRNA expression in  
403 Phox2a<sup>CKO</sup> mice appeared elevated compared to controls, suggesting that Phox2a may  
404 negatively regulate *Phox2a* expression.

405

406 To understand the molecular underpinnings of these phenotypes, we compared the  
407 expression of Phox2a AS neuron-enriched mRNAs (Fig. 5) in e11.5 and e16.5 Phox2a<sup>CKO</sup>  
408 and control mice, in neurons expressing *Phox2a* mRNA. Of these, only the expression of  
409 *Tm4sf4*, a gene encoding a protein implicated in cellular differentiation, was affected by  
410 *Phox2a*<sup>CKO</sup> mutation in e11.5 dI5 neurons and e16.5 lamina I neurons (Fig. 6F, G, J, K,  
411 S6G). Given the peptidergic heterogeneity of lamina V/LSN neurons (Leah et al., 1988),  
412 we also monitored the expression of neuromodulatory peptides and receptors in  
413 presumptive Phox2<sup>Deep</sup> neurons in e16.5 Phox2a<sup>CKO</sup> and control spinal cords. Indeed,  
414 expression of genes encoding lamina V/LSN-enriched peptides *Sst* (Somatostatin) and  
415 *Crh* (Corticotrophin-releasing hormone) was reduced in Phox2a<sup>CKO</sup> mice, while the  
416 expression of other Phox2a neuron-enriched transcripts such as *Tacr1* (expressed in some  
417 Phox2a<sup>Deep</sup> neurons), *Vip* (encoding Vasoactive Intestinal Peptide), *Tacr3* (encoding  
418 Tachykinin Receptor-3) and *Nms* (encoding Neuromedin S) co-expressed in some  
419 Phox2a<sup>Deep</sup> neurons) remained unaffected (Fig. 6L, M, S6K, L). Phox2<sup>Deep</sup> neurons also  
420 expressed *Tacr1* (NK1R), which is a known AS-enriched transcript, but not the  
421 interneuronal peptide *Cck* (Fig. S6M). We also monitored the expression of selected

422 neuromodulatory genes in lamina I neurons and found elevated expression of *Vip* in  
423 *Phox2a*<sup>ckO</sup> mice (Fig. S6J). Also, *Phox2a* mutant *Phox2a* neurons maintain their  
424 excitatory identity through the expression of *Slc17a6* or *Slc32a1* mRNAs encoding,  
425 respectively, neurotransmitter transporters vGluT2 and vGAT (Fig. S6H). Consistent  
426 with this, expression of spinal peptides associated with inhibitory neurons such as *Gal*  
427 (encoding Galanin), *pDyn* (encoding Dynorphin) and *pNoc* (encoding Nociceptin) were  
428 expressed sparsely among *Phox2*<sup>Deep</sup> neurons (Fig. S6M). Together, these results  
429 demonstrate that *Phox2a* is essential for normal axonal connectivity and migration of AS  
430 neurons, as well as their transcriptional identity.

431

#### 432 **Spinal *Phox2a* loss impairs supraspinal nocifensive behaviours.**

433 Given the central role of the AS in supraspinal nociceptive signal relay, we reasoned that  
434 defects in spino-parabrachial connectivity and *Phox2*<sup>Deep</sup> neuromodulatory peptide  
435 expression in *Phox2a*<sup>ckO</sup> mice might result in impaired nocifensive behaviours that are  
436 evoked by supraspinal circuits, with minimal effect on spinally mediated behaviours.  
437 Indeed, spinal-level thermal (radiant heat paw-withdrawal, Fig. 6N, hot water tail-flick,  
438 Fig. 6O) and mechanical assays (von Frey test, Fig. 6P), did not reveal any differences  
439 between control and *Phox2a*<sup>ckO</sup> mice. However, using a battery of behavioural assays  
440 requiring supraspinal transmission of noxious information, significant differences  
441 between control and *Phox2a*<sup>ckO</sup> mice emerged. Thermal preference to innocuous and  
442 noxious temperatures (Fig. S6T–V) and behaviours evoked by innocuous touch in the  
443 adhesive removal test (Fig. 6Q, S6N) were not affected by the *Phox2a*<sup>ckO</sup> mutation. In  
444 contrast, *Phox2a*<sup>ckO</sup> mice showed deficits in hind paw licking evoked by noxious stimuli

445 – a nocifensive behaviour requiring ascending spinal projections. When mice were placed  
446 on a 53 °C hot-plate, which evokes licking of the hind paws Phox2a<sup>ckO</sup> mice spent  
447 significantly less time licking compared to controls (Fig. 6R, 6SO). One of the common  
448 dependent measures in the hot-plate test is hind paw flutter/shake incidence, a spinal  
449 reflex measure, as well as latency to any behaviour (hind paw flutter, licking, or jumping)  
450 which was not different between the experimental groups (Fig. 6S, S6P). Though the  
451 frequency of jumping (escape) behaviours in the hot-plate test was not different (Fig.  
452 S6Q), 4/13 control mice attempted escape versus 1/14 Phox2a<sup>ckO</sup> mice. Neither control  
453 nor Phox2a<sup>ckO</sup> mice displayed nocifensive behaviours in the cold-plate test (Fig. S6R).  
454 Phox2a<sup>ckO</sup> mice also spent less time licking their hind paw cooled with acetone (Fig. 6T,  
455 S6S) as well as following noxious mechanical stimulation (Fig. 6U). Furthermore,  
456 Phox2a<sup>ckO</sup> mice also exhibited less licking of hind paws injected with TRPV1 and  
457 TRPA1 agonists capsaicin and formalin, respectively, although the late/tonic phase of  
458 post-formalin injection licking was not affected (Fig. 6V–X). Together these results show  
459 that a loss of Phox2a during development dramatically disrupts AS neuron innervation of  
460 the pB and their molecular differentiation and concomitantly affects supraspinal aspects  
461 of a variety of nocifensive behaviours associated with AS function.

462

### 463 **Phox2a neuron molecular identity is conserved in the developing human spinal cord**

464 Given that many classical insights into AS function arose from clinical observations, and  
465 that little is known about the molecular identity of human spinal neurons, we wondered  
466 whether Phox2a expression in the developing human spinal cord might allow insight into  
467 human nociception. We thus examined the expression of Phox2a protein and that of

468 dorsal horn neuronal markers Pax2, Lmx1b, Lbx1, Tlx3, Pou4F2, and the nociceptive  
469 afferent marker TrkA, in human spinal cords at developmental ages similar to mouse  
470 mid-gestation: two at gestational week (G.W.) 7.3, and one each at G.W. 7.4, 8.0 and 8.4,  
471 three of which are depicted here ((Altman and Bayer, 2001) Fig. 7A; S7). At G.W. 7.3  
472 Phox2a neurons (identified using a commercial Phox2a antibody, Fig. S7C) were found  
473 in the superficial dorsal horn adjacent to TrkA+ fibers (Fig. 7B', S7A, S7B), in deeper  
474 laminae (Fig. 7B'') and near the roof plate (Fig. 7B'''), resembling the location of mouse  
475 Phox2a<sup>LamI</sup> and Phox2a<sup>Deep</sup> neurons. Human spinal Phox2a neurons co-expressed Lmx1b,  
476 Lbx1, but not Pax2, or Tlx3 (Fig. 7B, S7A, S7B). As in mouse spinal cords, human  
477 Phox2a expression appeared weaker in older spinal cords (G.W. 8.4, Fig. 7A, S7B) and  
478 *Phox2a* mRNA was not detected in human cords at later gestational ages (between G.W.  
479 15–20, S. R. and A. K., unpublished observations). Together, these data suggest that the  
480 spinal Phox2a neuron developmental program is evolutionarily conserved and that  
481 Phox2a expression is a molecular feature of developing human AS neurons.

482 **Discussion:**

483 The anterolateral system (AS) is critical for the relay of nociceptive signals from the  
484 periphery to the brain yet, despite many years since its discovery, the molecular identity  
485 of AS neurons and their precise function remain obscure. Here we present evidence that  
486 essentially all spinal neurons that express Phox2a during their development innervate  
487 supraspinal targets and constitute a major tributary of the AS. Phox2a loss results in  
488 defects in spino-parabrachial connectivity and supra-spinal nocifensive behaviours.  
489 Furthermore, Phox2a neurons with molecular profiles identical to those in mice exist in  
490 the developing human spinal cord, arguing for an evolutionary conservation of this  
491 canonical pain relay pathway. Together, our observations reveal a rich developmental  
492 heterogeneity of AS neurons and provide insights into a molecular logic that underlies  
493 their functions.

494

495 **Diversity of AS neuron development revealed by Phox2a expression**

496 Nearly all spinal Phox2a neurons can be retrograde labelled from the VPL thalamus and  
497 the pB and, as certain experiments resulted in virtually all spinal Phox2a neurons taking  
498 up retrograde tracer, we assume that their unlabelled fraction is a function of labelling  
499 efficiency or innervation of non-VP or pB brain targets. We thus propose that Phox2a is a  
500 genetic marker of AS neurons, allowing insights into the cellular and molecular  
501 mechanisms that produce their diversity. We classified AS neuron heterogeneity into at  
502 least three distinct and sequentially generated populations of spinal Phox2a neurons  
503 arising from the dI5 spinal progenitor domain: Phox2a<sup>LamI</sup>, Phox2a<sup>DeepEarly</sup> and  
504 Phox2a<sup>DeepLate</sup>. Contrary to the notion that spinal neurons are born in a ventral to dorsal



505 order (Nornes and Carry, 1978), superficial dorsal horn Phox2a neurons are born  
506 concurrently with motor neurons, as suggested recently for spinofugal neurons (Nishida  
507 and Ito, 2017). *Ascl1* (expressed in dI5 progenitors) and *Ptf1a* (expressing in dI4  
508 progenitors) were previously shown to, respectively, promote and inhibit dI5 neuron fates  
509 (Glasgow et al., 2005; Helms et al., 2005). Our data demonstrate that this may occur via  
510 direct action at a distal *Phox2a* enhancer defined in this study. The stereotyped birth  
511 order of Phox2a AS neurons raises the possibility that it is orchestrated by transcription  
512 factors involved in temporal competence of *Ascl1*-expressing progenitors, as in the  
513 cerebral cortex and retina (Kohwi and Doe, 2013).

514

515       Following birth and early specification,  $\text{Phox2a}^{\text{LamI}}$ ,  $\text{Phox2a}^{\text{DeepEarly}}$  and  
516  $\text{Phox2a}^{\text{DeepLate}}$  AS neurons migrate along distinct trajectories.  $\text{Phox2a}^{\text{LamI}}$  neurons move  
517 tangentially to the surface of the developing dorsal horn, in contrast to radial trajectories  
518 of  $\text{Phox2a}^{\text{Deep}}$  neurons. The contacts between afferent axons and  $\text{Phox2a}^{\text{LamI}}$  neurons, and  
519 their implied importance for normal  $\text{Phox2a}^{\text{LamI}}$  migration suggest a developmental  
520 interplay between afferent sensory axons and their spinal neuron targets. One  
521 consequence of this interaction may be the settling of lamina I neurons in somatotopic  
522 order corresponding to their dermatome-specific sensory afferents (Willis et al., 1974).  
523 Consistent with their sparse sensory afferent innervation,  $\text{Phox2a}^{\text{Deep}}$  neuron position is  
524 unaffected by the loss of primary afferents. At the molecular level, the neuronal  
525 migration cue Reelin is likely mediating the radial migration of  $\text{Phox2a}^{\text{Deep}}$  neurons since  
526 its intracellular signalling effector Dab1 is required for normal positioning of lamina/LSN  
527 neurons (Yvone et al., 2017). Netrin signalling likely coordinates the interplay between

528 sensory afferents and  $\text{Phox2a}^{\text{Lami}}$  neurons since its expression in the nascent dorsal horn  
529 prevents the premature ingrowth of primary afferents expressing the netrin1 repulsive  
530 receptor *Unc5c* (Watanabe et al., 2006), and the netrin1 attractive receptor DCC is  
531 required for the normal entry of  $\text{Phox2a}^{\text{Lami}}$  neurons into the dorsal horn (Ding et al.,  
532 2005).

533

534 Molecular profiling of early (e11.5) AS neurons under the assumption that they  
535 are an early-born dI5 *Lmx1b*-expressing cohort, reveals at least two distinct AS precursor  
536 populations: *Phox2a*<sup>+</sup> cells and a complementary population of *Lmx1b*<sup>+</sup> *Tac1*<sup>+</sup> cells that  
537 likely give rise to the recently identified *Tac1*-expressing AS neurons (Huang et al.,  
538 2019). While no *Tac1* dI5 neuron-enriched genes emerged from our analysis, we have  
539 identified *Phox2a* AS neuron-enriched transcripts and proteins with developmental and  
540 neuronal physiology functions. *Tm4sf4* and *Shox2* are involved in cell fate specification  
541 (Anderson et al., 2011), while the axon guidance receptors DCC and *Robo3* are critical  
542 for the commissural projection of spinal neuron (Fazeli et al., 1997; Sabatier et al., 2004),  
543 and in particular, that of spino-thalamic neurons (da Silva et al., 2018). *Pdzrn3*, a E3-  
544 ubiquitin ligase involved in Wnt receptor signalling, may contribute to the elaboration of  
545 long axons characteristic of AS neurons, given that many long axons tracts require the  
546 Wnt receptor *Frizzled3* (Hua et al., 2014). Despite  $\text{Phox2a}^{\text{Lami}}$  and  $\text{Phox2a}^{\text{Deep}}$  neuron  
547 identities diverging through the expression of genes associated with neuronal function,  
548 nearly all *Phox2a* AS neurons share a glutamatergic identity. The function of  $\text{Phox2a}^{\text{Lami}}$   
549 neurons could be modulated by a host of co-expressed factors, such as the peptides *Nms*,  
550 *Crh*, *Sst*, *dynorphin*, *Vip* or the acetylcholine receptor-binding neurotoxin *Lypd1*, as well

551 as the alpha subunit of the Nav1.7 channel encoded by the *Scn9a*, known for its role in  
552 pain insensitivity syndromes in humans (Cox et al., 2006).

553

#### 554 **Phox2a is required for the terminal differentiation of AS neurons**

555 *Phox2a*-expressing neurons are present in normal numbers in neonatal *Phox2a*<sup>CKO</sup> spinal  
556 cords suggesting that *Phox2a* is not required for their early specification or survival.

557 However, *Phox2a* mutation results in the loss of *Tm4sf4* and gain of VIP expression in

558 *Phox2a*<sup>Lami</sup> neurons, indicating that *Phox2a* is required for their molecular differentiation,

559 and thus possibly their function, despite apparently normal target connectivity. In

560 contrast, nearly 75% of lamina V/LSN AS neurons fail to innervate the pB in *Phox2a*<sup>CKO</sup>

561 mice. This indicates that *Phox2a* is expressed in and required for the normal development

562 of a vast majority of lamina V/LSN neurons, in agreement with our observation that

563 *Phox2a*<sup>Cre</sup> under-reports *Phox2a* expression in many of these neurons. One possibility is

564 that the aberrant *Phox2a*<sup>Deep</sup> neuron position in *Phox2a*<sup>CKO</sup> mice, similar to that observed

565 for LSN neurons in *Reelin*-deficient mice (Wang et al., 2012; Yvone et al., 2017), could

566 impact their target connectivity or stability. Together, with the observation that *Phox2a*

567 mutation also results in the loss of neuropeptide expression in *Phox2a*<sup>Deep</sup> neurons, these

568 defects argue that *Phox2a* specifies the terminal differentiation of AS neurons, and its

569 absence likely impairs their function.

570

#### 571 **Phox2a AS neuron function in supraspinal nociception**

572 Adult *Phox2a* AS neuron morphologies and laminar organisation are typical of

573 nociceptive AS neurons such that *Phox2a*<sup>Lami</sup> neurons are likely a subset of the

574 nociceptive-specific and somatotopically-organised lamina I AS projection neurons,  
575 while *Phox2a*<sup>Deep</sup> neurons are likely a subset of the wide dynamic-range lamina V AS  
576 projection neurons, with the neuropeptide-expressing LSN neurons implicated in deep  
577 tissue nociception (Keay and Bandler, 2002). Spinal *Phox2a* neurons also innervate many  
578 of the principal AS brain targets involved in nociception, including the VPL thalamus, pB  
579 and the periaqueductal gray. *Phox2a*<sup>CKO</sup> mice exhibit disrupted spinofugal connectivity  
580 and deficiencies in nocifensive behaviours associated with supraspinal circuit functions,  
581 in line with the requirement of the AS in relaying nociceptive information to the brain.  
582 Despite thermosensation relay being a feature of AS neurons (Hyndman and Wolkin,  
583 1943), the apparently normal temperature preference of *Phox2a*<sup>CKO</sup> mice may result from  
584 *Hoxb8*<sup>Cre</sup> expression omitting the upper cervical spinal cord (Witschi et al., 2010) which  
585 receives thermal information from the forelimb and neck. In contrast, the normal hind  
586 limb adhesive tape-evoked behaviours in *Phox2a*<sup>CKO</sup> mice are consistent with the notion  
587 that fine touch sensation is not a function of the AS (Hyndman and Wolkin, 1943).  
588 Despite having a large population of aberrantly-developed caudal AS neurons, *Phox2a*<sup>CKO</sup>  
589 mice have normal spinal nocifensive reflexes indicating that both local reflex circuitry  
590 and the descending pathways that modulate these behaviours (Ren and Dubner, 2009) do  
591 not depend on normal AS function.

592

593 *Phox2a*<sup>LamI</sup> neurons have been proposed to transmit sensory-discriminative  
594 information, and their function is likely impaired in *Phox2a*<sup>CKO</sup> mice, but the study of this  
595 AS function is constrained by the motivational-affective drive of behavioural measures of  
596 sensory-discriminative nociceptive function. Indeed, *Phox2a*<sup>CKO</sup> mice have a reduction in

597 the frequency and duration of nociception-related behaviours evoked by the relay of  
598 spinal nociceptive signals to the brain, suggesting that the transmission of motivational-  
599 affective information is likely carried out by Phox2a AS neurons. In Phox2a<sup>CKO</sup> mice,  
600 lamina V/LSN neuron innervation of the pB is severely reduced, consistent with the  
601 notion that lamina V/LSN AS neurons convey noxious motivational information through  
602 the spino-pBil-medial thalamus pathway that impinges on the pre-frontal cortex  
603 (Bourgeois et al., 2001). At the molecular level, *Phox2a* mutation also causes decreased  
604 expression of mRNAs encoding neuropeptides Sst (Leah et al., 1988) and Crh, normally  
605 enriched in Phox2a<sup>Deep</sup> neurons of lamina V/LSN. Given the role of Crh in stress  
606 responses, Crh-expressing Phox2a<sup>Deep</sup> neurons may convey motivational information  
607 linked to noxious stimuli.

608

609         Recent experiments point to another genetically defined component of the AS: an  
610 intersectional genetic ablation of Tac1 neurons, some of which are spino-parabrachial AS  
611 neurons, result in behavioural deficits similar to those in Phox2a<sup>CKO</sup> mice (Huang et al.,  
612 2019). This could be explained by ~20% of Phox2a<sup>Deep</sup> neurons expressing Tac1 and is in  
613 line with lamina V/LSN neurons transmitting the emotional-motivational aspect of  
614 nociception, although it is unclear whether all Tac1 AS neurons are a subset of the  
615 Phox2a<sup>Deep</sup> neuron population. Another possibility is that Tac1 non-AS interneurons  
616 ablated by the intersectional approach regulate Phox2a<sup>Deep</sup> neuron function. Some  
617 distinctions may be made between Tac1 and Phox2a neurons, as deficits in capsaicin-  
618 evoked licking are seen in Phox2a<sup>CKO</sup> mice but not in Tac1-ablated mice; thus, Phox2a

619 neurons relaying noxious heat or chemical stimuli may be Phox2a<sup>LamI</sup> neurons that are  
620 distinct from Tac1 lamina I AS neurons.

621

## 622 **The molecular logic of the anterolateral system**

623 Supraspinal Phox2a lineage-derived neurons exist in a variety of autonomic circuits  
624 raising the question of whether these may be functionally intertwined with Phox2a AS  
625 neurons. Two lines of thought shed some light on this: firstly, Phox2a and its closely-  
626 related transcription factor Phox2b, specify the development of neurons afferent to  
627 medullary visceral reflex circuits that control many autonomic functions implicated in  
628 homeostasis (Brunet and Pattyn, 2002). Our genetic tracing experiments reveal that  
629 Phox2a AS neurons participate in this connectivity logic by innervating brain stem pre-  
630 autonomic regions such as the NTS and CVLM, as well as higher autonomic regulatory  
631 regions such as the pB. Secondly, because pain motivates behaviours that correct  
632 homeostatic changes, it has been proposed as a “homeostatic emotion” (Craig, 2003a). In  
633 light of this, the AS can be viewed as a pathway signalling deviations from homeostasis,  
634 such as changes in skin temperature, or the presence of noxious or pruritogenic stimuli, to  
635 brain regions that trigger compensatory autonomic responses (e.g.: CVLM) or drive  
636 compensatory behavioural responses such as licking or scratching (e.g.: pB). Given this,  
637 Phox2a AS neurons may specialize in transmitting somatic sensations with a motivational  
638 character such as cutaneous and deep pain, thermosensation, itch, visceral pain, nausea,  
639 and sexual arousal, all of which are abolished by anterolateral cordotomy in humans  
640 (Hyndman and Jarvis, 1940; Hyndman and Wolkin, 1943).

641           Our results suggest that the molecular identity of mouse *Phox2a* AS neurons is  
642 conserved in the developing human spinal cord, pointing to a conserved molecular logic  
643 of somatosensory circuit development, supported, in part, by the expression of *PHOX2A*  
644 in the human locus coeruleus (Fan et al., 2018). A genetic proof of this idea remains out  
645 of reach because of the lack of obvious nociceptive or autonomic deficits in humans with  
646 *PHOX2A* mutations, which may be due to hypomorphic alleles (Nakano et al., 2001).  
647 Nevertheless, *PHOX2A* is a compelling molecular marker of human AS neurons and  
648 given the effectiveness of cordotomy as a crude treatment of intractable chronic pain, a  
649 molecularly-defined inactivation of a *Phox2a* AS neuron subpopulations could be its  
650 more refined iteration.

651 **Acknowledgements:**

652 We thank Meirong Liang, Julie Cardin, Qinzhang Zhu and Colleen Barrick for technical  
653 assistance, Laura Kus (GENSAT) for advice on transgenic mouse design, Caroline Grou  
654 and Virginie Calderon for bioinformatics analyses, J.-F. Brunet for the Phox2a and  
655 Phox2b antiserum and advice, Carmen Birchmeier for Lmx1b, Tlx3 and Lbx1 antisera,  
656 Jay Bikoff for the Pou6F2 antiserum, Laskaro Zagoraiou for Shox2 antiserum, Hanns  
657 Ulrich Zeilhofer for the *Hoxb8<sup>Cre</sup>* mice, and, Jeff Mogil, Yves de Koninck and Stefano  
658 Stifani for discussions, and Jean-François Brunet, Adam Hantman, Denis Jabaudon, Jeff  
659 Mogil, Michel Cayouette, Sonia Paixao, Samuel Ferland and Feng Wang for comments  
660 on the manuscript.

661 R.B.R. was a recipient of a Ph.D. studentship from Fonds de recherche du Québec  
662 – Santé. S.R. received a studentship from McGill University's Healthy Brains, Healthy  
663 Lives (HBHL) initiative supported, in part, by Canada First Research Excellence Fund.  
664 J.E.J was supported by the National Institutes of Health R37 HD091856. A.C. was  
665 supported by Agence Nationale pour la Recherche and INSERM (transversal program  
666 HuDeCa). L.T. was supported by the Intramural Research Program of NCI, NIH. A.K. and  
667 M.K. were funded by Operating and Project Grants from the Canadian Institutes of  
668 Health Research (to A.K.: PJT-162225, MOP-77556, PJT-153053, PJT-159839; to M.K.:  
669 MOP-127110 and PJT-162143).

670



671 **Author contributions:**

672 Conceptualisation, R. B. R. and A. K.; Methodology, R. B. R., B. M., R. B., C. S., J. E.  
673 J., A. D., M. K.; Validation, R. B. R.; Formal Analysis, R. B. R. and B. M.; Investigation,  
674 R. B. R., F. B. B., B.M., S. R., R.B., C. S., W. S. T., and M. B.; Resources, R. B. R., A.  
675 D., M. K., L. T., Y. G., M. G., and A. K.; Data Curation, R. B. R., B. M., J. E. J.; Writing  
676 – Original Draft, R. B. R.; Writing – Review & Editing, R. B. R., F. B. B., S. R., M. K.,  
677 L. T., J. E. J., M. K., A. C., and A. K.; Visualisation, R. B. R., B. M., J. E. J.;  
678 Supervision, J. E. J., M. K., A. C., A. K.; Project Administration, A. K.; Funding  
679 Acquisition, J. E. J., M. K., A. C., A. K.

680

681 **Declaration of Interests:**

682 The authors declare no competing interests.

683 **Figure Legends:**

684

685 **Figure 1: Spinal Phox2a<sup>Cre</sup> neurons reside in lamina I, V and LSN.**

686 (A) BAC recombination strategy: *Cre-PolyA* insertion 3' to the *Phox2a* ATG codon in  
687 the BAC RP23-333J21. (B) tdTomato (tdT)<sup>+</sup> neurons in laminae I, V and LSN of the  
688 cervical spinal cord of adult *Phox2a<sup>Cre</sup>; R26<sup>LSL-tdT/+</sup>* mice. (B') Magnified box in (B)  
689 showing lamina I Neurotrace, tdT and NeuN co-labeling. (C) Expression of tdT and  
690 Phox2a in e11.5, e16.5 and adult *Phox2a<sup>Cre</sup>; R26<sup>LSL-tdT/+</sup>* mouse spinal cord. (D) Percent  
691 of tdT<sup>+</sup> neurons that express Phox2a, as well as percent of Phox2a<sup>+</sup> neurons that express  
692 tdT at e11.5, e16.5 and adult *Phox2a<sup>Cre</sup>; R26<sup>LSL-tdT/+</sup>* mice. (E) Percent of tdT<sup>+</sup> neurons  
693 that express Phox2a, as well as percent of Phox2a<sup>+</sup> neurons that express tdT in the  
694 superficial and deep dorsal horn of e16.5 *Phox2a<sup>Cre</sup>; R26<sup>LSL-tdT/+</sup>* mouse spinal cords.

695 Data are represented as mean ± SEM.

696 Numbers: n=4 e11.5, n=4 e16.5 and n=3 adult *Phox2a<sup>Cre</sup>; R26<sup>LSL-tdT/+</sup>* mice.

697 Scale bars: (B) 500 μm, (B') 100 μm, (C) 100 μm and insets 25 μm.

698 Abbreviations: SG (sympathetic ganglia).

699 **Figure 2: Spinal Phox2a<sup>Cre</sup> neurons innervate AS targets.**

700 (A) Intersectional genetic strategy to visualise spinofugal axons with tdT. *Phox2a<sup>Cre</sup>*;  
701 *R26<sup>LSL-tdT/+</sup>* mice have tdT cellular expression in the brain and spinal cord while  
702 *Phox2a<sup>Cre</sup>*; *Cdx2<sup>FlpO</sup>*; *R26<sup>FSF-LSL-tdT/+</sup>* mice have cellular tdT expression only in spinal  
703 *Phox2a* neurons. (B–F) *Phox2a<sup>Cre</sup>*; *R26<sup>LSL-tdT/+</sup>* mouse tdT expression, and NeuN and  
704 Neurotrace staining in the facial motor nucleus (B), locus coeruleus (C) and the caudal  
705 ventrolateral medulla (CVLM) (D), as well as the spinal dorsal horn (E, F). (B'–F') Same  
706 regions as in (B–F) have no cellular tdT expression in *Phox2a<sup>Cre</sup>*; *Cdx2<sup>FlpO</sup>*; *R26<sup>FSF-LSL-</sup>*  
707 *tdT/+* mice except below the cervical spinal cord. (E') Arrow: presumptive anterolateral  
708 (ALT) tract axons in white matter, not detectable in (E) presumably due to weaker axonal  
709 tdT expression from *R26<sup>LSL-tdT</sup>*. Insets in (E, F, E' and F') correspond to stippled boxes  
710 and show tdT+ cell bodies (arrows). (G–P) Prominent targets of tdT+ spinofugal axons.  
711 Higher magnification insets in M' and N'. (Q, Q', Q'') Neurotrace, tdT and vGluT2  
712 staining in the thalamus. Arrowheads in J indicate axon termini in putative orientation  
713 barrels of the superior colliculus. Arrowheads in higher magnification insets in Q', Q''  
714 point to putative synaptic termini where tdT co-localises with vGluT2 signal. (R)  
715 Diagram summarising the termination sites of tdT+ spinofugal axons.  
716 Numbers: n=3 *Phox2a<sup>Cre</sup>*; *R26<sup>LSL-tdT/+</sup>* adult mice, n=3 *Phox2a<sup>Cre</sup>*; *Cdx2<sup>FlpO</sup>*; *R26<sup>FSF-LSL-</sup>*  
717 *tdT/+* adult mice.  
718 Scale bars: 100  $\mu$ m, except (Q', Q'') 25  $\mu$ m.  
719 Abbreviations: ALT (anterolateral tract), AP (area postrema), CBL (cerebellum), CU  
720 (cuneate nucleus), CUN (cuneiform nucleus), DR (dorsal raphe), DRt (dorsal reticular  
721 nucleus), GP (globus pallidus), gr (granular layer of the cerebellum), GRN

722 (gigantocellular reticular nucleus), ic (internal capsule), IRN (intermediate reticular  
723 nucleus), KF (Kölliker-Fuse nucleus), LC (locus coeruleus), LH (lateral habenula), LP  
724 (lateral posterior thalamus), LRN (lateral reticular nucleus), MD (mediodorsal thalamus),  
725 MDRN (medullary reticular nucleus), MEV (midbrain trigeminal nucleus), MH (medial  
726 habenula), mo (molecular layer of the cerebellum), MV (medial vestibular nucleus),  
727 mVII (facial motor nucleus), mX (vagal motor nucleus), mXII (hypoglossal motor  
728 nucleus), NLL (nucleus of the lateral lemniscus), NTS (nucleus of the solitary tract), nVII  
729 (facial motor nerve), PAG (periaqueductal gray), PARN (parvocellular reticular nucleus),  
730 PAS (parasolitary nucleus), pB (parabrachial nucleus), pBcl (central-lateral parabrachial  
731 nucleus), pBdl (dorsal-lateral parabrachial nucleus), pBdm (dorsal-medial parabrachial  
732 nucleus), pBel (external-lateral parabrachial nucleus), pBil (internal-lateral parabrachial  
733 nucleus), pBrel (rostral external-lateral parabrachial nucleus), pBsl (superior-lateral  
734 parabrachial nucleus), pBvl (ventral-lateral parabrachial nucleus), PCG (pontine central  
735 gray), Po (posterior thalamus), PRN (pontine reticular nucleus), PRP (nucleus  
736 prepositus), PVT (paraventricular thalamus), RT (reticular thalamic nucleus), SCi  
737 (superior colliculus, intermediate laminae), scp (superior cerebellar peduncle), SCs  
738 (superior colliculus, superficial laminae), SPV (spinal trigeminal nucleus), Vest  
739 (vestibular nuclei), VP (ventral posterior thalamus), VPL (ventral posterolateral  
740 thalamus), ZI (zona incerta).

741 **Figure 3: Spinal *Phox2a*<sup>Cre</sup> neurons are predominantly AS neurons.**

742 Adult *Phox2a*<sup>Cre</sup>; *R26*<sup>LSL-tdT/+</sup> mice injected with FG in the VPL thalamus and CTb-488 in

743 the parabrachial nucleus. (A, B) Representative image of FG (A) and CTb-488 (B)

744 injection sites. (C, D) Percent of cervical spinal cord dorsal horn projection neurons

745 expressing tdT, classified as those labelled with either tracer (All PNs) in (C) or those

746 labelled selectively with FG or CTb in (D). In this quantification scheme, some neurons

747 positive for one tracer may also be positive for the other. (E) Diagram of location of tdT+

748 only (red), retrograde label only (FG or CTb, black) or tdT+ and tracer-labelled (purple)

749 neurons, in 5 non-sequential 25  $\mu$ m sections of the cervical spinal cord of one

750 representative animal. (F, G') Representative images of the cervical spinal cord

751 demonstrating tdT+ neuron labelling by FG or CTb tracer injections in, respectively, the

752 VPL or the pB. (F') High magnification of boxed area in lamina I in (F). (G') High

753 magnification of boxed area in lamina V/LSN in (G). Also see Fig. S3A for lamina I box

754 in (G). (F', G') Red arrow: tdT-only cell; cyan arrow: FG and CTb double-labelled cell;

755 green arrow: CTb-only cell; yellow arrow: tdT+ cell labelled with CTb. (H, I) Percent of

756 FG (H) or CTb (I)-labelled lamina V/LSN neurons also expressing tdT, in the cervical

757 spinal cord ipsilateral or contralateral to tracer injection. (J, K) Percent of FG (H) or CTb

758 (I)-labelled lamina I neurons also expressing tdT, in the cervical spinal cord ipsilateral or

759 contralateral to tracer injection. (L–N) Percent of tdT-labelled neurons labelled with

760 either or both tracers in all laminae (L), in lamina V/LSN (M), or in lamina I (N) in the

761 cervical spinal cord ipsilateral or contralateral to tracer injection. (O) Diagram depicting

762 overlap between tdT and retrograde tracer in lamina I of a representative mouse. (P)

763 Diagrams illustrating the estimated percentages of cervical and lumbar lamina I

764  $Phox2a^{Cre}$  neurons projecting to mouse VPL and/or pB. Stippled line represents spinal  
765 midline. Note the high degree of VPL/pB collateralised innervation by cervical  $Phox2a^{Cre}$   
766 neurons.

767 Data are represented as mean  $\pm$  SEM.

768 Numbers: n=7  $Phox2a^{Cre}$ ;  $R26^{LSL-tdT/+}$  adult mice (4 male, 3 female).

769 Statistics: (I, K) Mann-Whitney test, ns: non-significant, \*\*: p<0.01.

770 Scale bars: (A, B) 250  $\mu$ m, (F, G) 100  $\mu$ m, (F', G') 50  $\mu$ m.

771

772 **Figure 4: Heterogeneity of spinal Phox2a neuron migration, sensory afferent**  
773 **interaction and birth time.**

774 (A) Migration of Phox2a<sup>+</sup> (green), tdT<sup>+</sup> (magenta) and Phox2a<sup>+</sup> tdT<sup>+</sup> (white) neurons in  
775 embryonic spinal cords of *Phox2a*<sup>Cre</sup>; *R26*<sup>LSL-tdT/+</sup> mice aged between e10.5 and e15.5.  
776 Boxed regions in upper panels are magnified below. Spinal cord and spinal white matter  
777 are bounded by stippled lines (B, B') Location of tdT<sup>+</sup> neurons in the dorsal horn of  
778 *Phox2a*<sup>Cre</sup>; *R26*<sup>LSL-tdT/+</sup> spinal cords at e13.0, highlighting contacts (B', B'') between  
779 lamina I neurons (magenta) and TrkA<sup>+</sup> sensory afferents arriving in the dorsal horn  
780 (green). Micrograph in B is a flattened multi-layer z-stack, while images in B', B'' are  
781 single confocal micrographs. (C–E) Spinal Phox2a (green) neuron and Neurofilament  
782 light chain (NF-L, magenta) localisation in e14.5 *TrkA*<sup>+/+</sup>, *TrkA*<sup>+/-</sup> and *TrkA*<sup>-/-</sup> mouse  
783 embryos. Boxed regions in (C) magnified in (C') with arrows pointing to Phox2a cells in  
784 laminae I, V and the LSN. Counts of Phox2a neurons in lamina I (D) and lamina V/LSN  
785 (E). (F–I) Birthdating of spinal Phox2a neurons in e16.5 *Phox2a*<sup>Cre</sup>; *R26*<sup>LSL-tdT/+</sup> mouse  
786 embryos, exposed to BrdU at e9.5 (F), e10.5 (G) or e11.5 (H). Phox2a<sup>+</sup>/BrdU<sup>+</sup> neurons  
787 as a percent of all Phox2a<sup>+</sup> neurons in either lamina I or lamina V/LSN and compared  
788 between groups (I). (J–M) Birthdating of spinal tdT<sup>+</sup> neurons in e16.5 *Phox2a*<sup>Cre</sup>; *R26*<sup>LSL-</sup>  
789 *tdT/+ mouse embryos, exposed to BrdU at e9.5 (J), e10.5 (K) or e11.5 (L). tdT<sup>+</sup>/BrdU<sup>+</sup>  
790 neurons numbers as a percent of all tdT<sup>+</sup> neurons in either lamina I, lamina V/LSN or  
791 laminae II/III (“Antenna”-like cells) and compared between groups (M). tdT was detected  
792 with an anti-red fluorescent protein (RFP) antiserum. (N) Diagram of migration and birth  
793 patterns of spinal Phox2a neuron subpopulations.*

794 Data are represented as mean ± SEM.



795 Numbers: *Phox2a*<sup>Cre</sup>; *R26*<sup>LSL-tdT/+</sup> embryos: (A) n=3 e10.5, n=3 e11.5, n=3 e12.5, n=3  
796 e13.5, n=3 e14.5, n=3 e15.5, (B, B', B'') n=3 e13.0, (F–M) n=4-5 e16.5 per condition.  
797 (C–E) n=3 *TrkA*<sup>+/+</sup>, n=5 *TrkA*<sup>+/-</sup>, n=3 *TrkA*<sup>-/-</sup>.  
798 Statistics: (D, E) One-way ANOVA, with Tukey's Multiple Comparisons test, (I,M)  
799 individual one-way ANOVAs for each cell type (lamina I, lamina V/LSN and Antenna)  
800 with Tukey's multiple comparisons test; \*\*: p<0.01, \*\*\*: p<0.001.  
801 Scale bars: (A, C) 100 μm, (B, C', F–H, J–L) 50 μm, (B') and insets in (F–H, J–L) 10  
802 μm, and (B'') 1 μm.

803 **Figure 5: The molecular identity and specification of spinal Phox2a neurons**

804 (A–M) Molecular characterisation of spinal Phox2a neurons in the e10.5 *Phox2a<sup>Cre</sup>*;  
805 *R26<sup>LSL-tdT+</sup>* spinal cord. (A, B) Lack of co-expression of Phox2a and progenitor markers  
806 *Ascl1* (A) and *Pax7* (B). (C,D) Spinal dI5 tdT+ neurons co-express Phox2a, *Lmx1b* but  
807 not the spinal accessory motor neuron (SMN) markers *Phox2b* or *Isl1*. (E–J) Spinal  
808 Phox2a neurons express dorsal interneuron markers *Lbx1* (E), *Pou4F2* (F), *Tlx3* (G), but  
809 not *Lhx2* (H), *Isl1* (I), or *Pax2* (J). (K, L) Spinal Phox2a neurons express commissural  
810 neuron markers *Robo3* (K) and *DCC* (L). (M) Quantification of marker expression as a  
811 percentage of Phox2a and *Lmx1b* co-expressing cells.  
812 (N–P) Phox2a expression in control (N, N'), *Ascl1* null (O, O'), and *Ptf1a* null (P, P')  
813 E11.5 spinal cords. (N', O' and P') High magnification of boxed regions, in respectively,  
814 (N, O and P). (Q) Average numbers of Phox2a+ cells in spinal cord sections in control,  
815 *Ascl1* and *Ptf1a* mutant e11.5 spinal cords. (R–U) Representative images from transverse  
816 sections of embryonic day 4 chick neural tubes co-electroporated with the *ePhox2a-GFP*  
817 reporter and expression plasmids: control (Myc-tag only) (R), *Myc* *Ascl1* (S), *Myc* *Ascl1* and  
818 *Prdm13* (T), or *Myc* *Ptf1a* (U). Insets show Myc-tag expression. (V) Diagram of *Phox2a*  
819 expression regulation showing direct activation by *Ascl1*, potential activation by *Lmx1b*  
820 (Fig. S5), and inhibition by *Ptf1a*. (W–A1) UMAP Analysis using single-cell RNA  
821 sequencing data (Delile et al., 2019). (W–X) *Lmx1b*+ neurons from e9.5-e13.5 compared  
822 between each other; cluster 6 is enriched in *Phox2a*+ neurons (W). Other potential cluster  
823 6-enriched mRNAs are revealed in a volcano plot (X). (Y–AA) *Lmx1b*+ neurons from  
824 e9.5-e11.5 compared between each other; clusters 2 and 3 are enriched in *Tac1* and  
825 *Phox2* mRNAs, respectively (Y), and Cluster 2 and 3-enriched mRNAs are revealed in

826 respective volcano plots (Z, AA). (BB–OO) *In-situ* hybridisation of select mRNAs  
827 enriched in lamina I neurons, from UMAP analyses. (BB–FF) *Nms*, *Tm4sf4*, *Scn9*, *Tac1*  
828 and *Zim1* mRNAs predicted as enriched in dI5 cells (X, AA) are co-expressed with  
829 *Phox2a*, with the exception of *Tac1* which is present in dI5 *Lmx1b*<sup>+</sup> neurons that do not  
830 express *Phox2a* (DD). (GG) Percent of e11.5 *Phox2a*<sup>+</sup> cells co-expressing predicted dI5-  
831 enriched mRNAs. (HH) A diagram of dI5 neurons highlighting the non-overlapping  
832 populations of dI5-*Phox2a*<sup>+</sup> and dI5-*Tac1*<sup>+</sup> neurons. (II–MM) dI5-enriched mRNAs  
833 identified in (X, AA) are co-expressed in *Phox2a*<sup>+</sup> lamina I neurons at e16.5, except for  
834 *Tac1* (KK). (NN) Quantification of novel dI5-enriched mRNAs co-expression with  
835 *Phox2a* in e16.5 lamina I neurons. (OO) Summary diagram demonstrating subdivision of  
836 lamina I neurons by *Phox2a* and *Tac1* expression.

837 Data are represented as mean ± SEM.

838 Numbers: *Phox2a*<sup>Cre</sup>; *R26*<sup>LSL-tdT/+</sup> embryos (A–M) n=3 e10.5, (BB–GG) n=3 e11.5, (II–  
839 NN) n=3-4 e16.5. (N–Q) n=6 control, n=3 *Ascl1*<sup>GFP/GFP</sup>, n=4 *Ptf1a*<sup>Cre/Cre</sup> embryos, (R–U)  
840 n=6 E4 chicken embryos for each condition.

841 Statistics: (Q) Student's t-test, \*\*: p<0.01, \*\*\*: p<0.001.

842 (W–AA) Data derived from Delile et al., (2019); data processing and statistics described  
843 in STAR Methods.

844 Scale bars: All 50 µm, except (K, L) insets 10 µm.

845 Abbreviations: DRG (dorsal root ganglion), MN (motor neurons).

846 **Figure 6: Phox2a is required for AS neuron development and function.**

847 (A) The parabrachial nucleus of control ( $Hoxb8^{Cre}; Phox2a^{+/+}; R26^{LSL-tdT/+}$ , Ctrl, top row)  
848 and  $Phox2a^{cKO}$  ( $Hoxb8^{Cre}; Phox2a^{ff}; R26^{LSL-tdT/+}$ , cKO, bottom row) adult mice, depicting  
849 spino-parabrachial axons labelled via  $Hoxb8^{Cre}$ -driven axonal tdT expression and  
850 counterstained with Neurotrace (magenta). Left panels show low power view, magnified  
851 in the right panels, with insets depicting tdT axons (black signal, arrows) (B) Diagram  
852 depicting the loss of spinal afferents (magenta) to the pB in  $Phox2a^{cKO}$  mice. (C–E)  
853 Spinal neurons labelled by CTb injections in the pB, in lamina I (left column of C,  
854 quantified in D) and lamina V/LSN (right column of C, quantified in E), in control (top  
855 row) and  $Phox2a^{cKO}$  (bottom row) adult mice. (F–G) Expression of  $Phox2a$ ,  $Lmx1b$  and  
856 dI5-enriched  $Tm4sf4$ ,  $Tac1$ ,  $Nms$ , and  $Scn9a$  mRNAs in control (top row) and  $Phox2a^{cKO}$   
857 (bottom row) e11.5 spinal cords. (G) Percent of  $Phox2a^{+}$  cells co-expressing each  
858 mRNA in control and  $Phox2a^{cKO}$  mouse embryos. See Fig. S6 for additional images. (H,  
859 I) Distribution of  $Phox2a^{+}$  neurons (green) in e16.5 control and  $Phox2a^{cKO}$  mouse  
860 embryos, co-stained with DAPI (blue). (H) Insets show individual  $Phox2a^{+}$  cells  
861 magnified. (I) Individual  $Phox2a$  cell locations in 3-5 sections (10  $\mu$ m) of 4 control (grey  
862 circles) and 4  $Phox2a^{cKO}$  (black circles) e16.5 spinal cords. Coordinates are normalised to  
863 the width and height and cells plotted on an idealised spinal cord, suggesting an  
864 abnormally centralised location of  $Phox2a^{+}$  cells in  $Phox2a^{cKO}$  embryos. The right panels  
865 are density plots of the normalized mediolateral distribution of lamina I and lamina  
866 V/LSN  $Phox2a$  neurons, with mediolateral position normalised to spinal cord width.  
867 Individual lines represent single animals, dotted lines represent mean distribution of 4  
868 animals, grey lines represent control embryos and black lines represent  $Phox2a^{cKO}$

869 *Phox2a*<sup>+</sup> cells. Black arrows point to the bimodal distribution of *Phox2a*<sup>CKO</sup> *Phox2a*<sup>+</sup>  
870 cells in deep laminae. (J, K) Expression of selected dI5-enriched *Nms*, *Scn9A*, *Tm4sf4*  
871 and *Tac1* mRNAs in lamina I *Phox2a*<sup>+</sup> neurons of e16.5 control (top row) and *Phox2a*<sup>CKO</sup>  
872 (bottom row) embryos. (K) Quantification of the percent of *Phox2a*<sup>+</sup> neurons expressing  
873 selected mRNAs. (L, M) Expression of *Tac1*, *Vip*, *Sst*, *Tacr3*, *Crh*, *Nms* mRNAs  
874 encoding neuropeptides and neuropeptide receptors in lamina V/LSN *Phox2a*<sup>+</sup> neurons  
875 of e16.5 control (top row) and *Phox2a*<sup>CKO</sup> (bottom row) embryos. See Fig. S6 for  
876 additional images. (M) Quantification of the percent of lamina V/LSN *Phox2a*<sup>+</sup> neurons  
877 expressing selected mRNAs. (N–P) Measures of spinal reflexes in control and *Phox2a*<sup>CKO</sup>  
878 mice: (N) Radiant heat paw-withdrawal assay; n=11 control, n=12 *Phox2a*<sup>CKO</sup>. (O) Hot-  
879 water Tail Flick assay; n=11 control, n=12 *Phox2a*<sup>CKO</sup>. (P) von Frey test; n=10 control,  
880 n=10 *Phox2a*<sup>CKO</sup>. (Q) Adhesive removal latency in control and *Phox2a*<sup>CKO</sup> mice over 5  
881 days. Failure to remove the adhesive within 30 minutes is recorded as a 30-minute  
882 latency. n=11 control, n=10 *Phox2a*<sup>CKO</sup>. (R–X) Measures of supraspinal nociception. (R–  
883 U) Responses to non-injected noxious stimuli: Time spent licking (R) and latency to any  
884 response (S) during the hot-plate test; n=13 control, n=14 *Phox2a*<sup>CKO</sup>. (T) Time spent  
885 licking after hind paw application of acetone, n=11 control, n=11 *Phox2a*<sup>CKO</sup>. (U) Time  
886 spent licking after toothless alligator clip application to hind paw; n=15 control, n=16  
887 *Phox2a*<sup>CKO</sup>. (V–X) Time spent licking after hind paw injection of noxious substances: (V)  
888 capsaicin; n=11 control, n=12 *Phox2a*<sup>CKO</sup>; (W, X) formalin (W, acute phase, X, late  
889 phase); n=11 control, n=12 *Phox2a*<sup>CKO</sup>.  
890 Data are represented as mean ± SEM.

891 Numbers: A) n=4 control, n=4 Phox2a<sup>ckO</sup> adult mice; (C–E) n=4 control, n=6 Phox2a<sup>ckO</sup>  
892 adult mice; (F, G) n=3 control, n=5 Phox2a<sup>ckO</sup> e11.5 mice; (H, I) n=4 control, n=4  
893 Phox2a<sup>ckO</sup> e16.5 mice; (J, K) n=3-4 control, n=3 Phox2a<sup>ckO</sup> e16.5 mice; (L, M) n=3-8  
894 control, n=3-8 Phox2a<sup>ckO</sup> e16.5 mice; (N–X) Numbers described above.

895 Statistics: (D, E) Two-way ANOVA with Tukey's multiple comparisons test, (I)  
896 Unpaired t-test, (G, K, M) multiple t-tests using Holm-Sidak method, (Q) mixed-effects  
897 analysis with Sidak's multiple comparisons test and Mann Whitney test (N, O, P, R, S, T,  
898 U, V, W, X). ns: non-significant, \*: p<0.05, \*\*: p<0.01, \*\*\*: p<0.001.

899 Scale bars: (A) 250 μm, (C) 50 μm, (H) 100 μm, insets 20 μm, (F, J, L) 50 μm, insets 10  
900 μm.

901 Images in Fig. 5CC,DD have been re-used in Fig. 6F and images in Fig. 5 II, JJ, KK, LL  
902 have been re-used in Fig. 6J. Data from Fig. 5GG, NN representing the above images are  
903 re-used in Fig. 6G and K respectively. Validation of enriched mRNAs from RNA-Seq  
904 analysis in control embryos (Fig. 5) and comparison of enriched mRNAs between control  
905 and Phox2a<sup>ckO</sup> embryos (Fig. 6) were performed as a single experiment.

906 Abbreviations: cl (central lateral parabrachial nucleus), dl (dorsal lateral parabrachial  
907 nucleus), dm (dorsal medial parabrachial nucleus), el (external lateral parabrachial  
908 nucleus), il (internal lateral parabrachial nucleus), DRG (dorsal root ganglion), m (medial  
909 parabrachial nucleus), MEV (midbrain trigeminal nucleus), MN (motor neurons), mV  
910 (trigeminal motor nucleus), pB (parabrachial nucleus), PCG (pontine central gray), PRN  
911 (pontine reticular nucleus).

912 **Fig. 7: Phox2a neuron molecular identity is conserved in the developing human**  
913 **spinal cord**

914

915 (A) Sections of G.W. 7.3-8.4 human spinal cords showing Phox2a, Lmx1b, TrkA and  
916 Pax2 expression. Location of higher magnification panels is shown in boxed regions. (B)  
917 Phox2a, Lmx1b, Pax2, Pou4F2, Tlx3, Lbx1 and TrkA expression in the G.W. 7.3 spinal  
918 cord, demonstrating co-labeling of Phox2a neurons with dorsal horn markers Lmx1b and  
919 Lbx1, but not with Pax2, Pou4F2 or Tlx3, in a Phox2a<sup>LamI</sup>/Phox2a<sup>DeepEarly</sup>-like cluster  
920 (B'), the deep dorsal horn (B'') and a Phox2a<sup>DeepLate</sup>-like cluster near the roof plate (B''').  
921 Top row right panel shows apposition of Phox2a cells with TrkA+ sensory afferents,  
922 similar to that in mouse (Fig. 4). Insets show higher magnification of boxed regions  
923 (TrkA and Phox2a channels split and inverted). All experiments used the Abcam Phox2a  
924 antibody. See Fig. S7 for antibody specificity controls.

925 Numbers: (A) Three human embryonic spinal cords (G.W. 7.3, 7.4 and 8.4 are  
926 represented here. (B) One G.W. 7.3 human embryonic spinal cord (from A) is  
927 represented here.

928 Scale bars: (A) 200  $\mu$ m, (B) 100  $\mu$ m, Insets in (B', B'' and B''') 10  $\mu$ m.

929 **STAR Methods:**

930

931 **LEAD CONTACT AND MATERIALS AVAILABILITY:**

932 Further information and requests for resources and reagents should be directed to and will  
933 be fulfilled by the Lead Contact, Artur Kania (artur.kania@ircm.qc.ca)

934

935 **EXPERIMENTAL MODEL AND SUBJECT DETAILS:**

936 **Mouse lines and *Phox2a*<sup>Cre</sup> mouse line generation:**

937 Adult male and female mice, between 6–19 weeks of age, were used in this study. Sex  
938 ratios were kept as close to 1:1 as possible in all experiments, though not all experiments  
939 had the power to distinguish sex differences. Mice were kept on a 12 hour light : 12 hour  
940 dark cycle (light 6:00-18:00) with food and water provided *ad-libitum*. All procedures  
941 (except those involving *TrkA*<sup>-/-</sup>, *Ptf1a*<sup>CRE</sup> and *Ascl1*<sup>GFP</sup> mice) were approved by the IRCM  
942 Animal Care Committee, using regulations and guidelines provided by the Canadian  
943 Council for Animal Care (CCAC). *TrkA*<sup>-/-</sup> mouse use was approved by the Committee of  
944 Animal Care and Use of the National Cancer Institute, while the use of *Ptf1a*<sup>CRE</sup> and  
945 *Ascl1*<sup>GFP</sup> mouse lines (maintained on a mixed background of ICR and C57Bl/6), was  
946 approved by the Institutional Animal Care and Use Committee at University of Texas  
947 Southwestern. *Phox2a*<sup>Cre</sup> mice were generated at the IRCM where *Phox2a*-containing  
948 BAC RP23-333J21 (GENSAT, 2008) was modified by insertion of a Cre-PolyA  
949 sequence into the ATG site of *Phox2a* using GalK recombineering strategies (Warming et  
950 al., 2005). The Cre-containing BAC was injected into fertilized ova, and the resulting  
951 offspring were screened for genomic insertion of the BAC using Cre PCR. In total, we



952 screened 230 pups, and were able to produce one founder from which all mouse lines  
953 containing *Phox2a*<sup>Cre</sup> were derived. Genotyping was done by PCR for *Cre*, *FlpO*, *R26*<sup>LSL-</sup>  
954 *tdT/+* (Ai14), *R26*<sup>FSF-LSL-tdT/+</sup> (Ai65), *Phox2a*<sup>ff</sup> and *TrkA*<sup>-/-</sup> as previously described  
955 (Glasgow et al., 2005; Kim et al., 2008). The *Ptf1a*<sup>CRE</sup> mouse line replaces the coding  
956 sequence for *Ptf1a* with that for *Cre* recombinase (Kawaguchi et al., 2002) and the  
957 *Ascl1*<sup>GFP</sup> (*Ascl1*<sup>tm1Reed/J</sup>) mouse strain replaces the coding sequence of *Ascl1* with that for  
958 *GFP* (Leung et al., 2007).

959

#### 960 **Generation of mice and mouse embryos:**

961 Mice containing the following transgenes or alleles were generated: *Phox2a*<sup>Cre</sup>; *R26*<sup>LSL-</sup>  
962 *tdT/+*, *Phox2a*<sup>Cre</sup>; *Cdx2*<sup>FlpO</sup>; *R26*<sup>FSF-LSL-tdT/+</sup>, and *Hoxb8*<sup>Cre</sup>, *Phox2a*<sup>ff</sup>, *R26*<sup>LSL-tdT/+</sup>,  
963 *Ascl1*<sup>GFP/GFP</sup>, *Ptf1a*<sup>Cre/Cre</sup>, *TrkA*<sup>-/-</sup>, *Hoxb8*<sup>Cre</sup>; *Phox2a*<sup>ff</sup>; *R26*<sup>LSL-tdT/+</sup>, by breeding parents  
964 bearing one or more of the necessary alleles/transgenes. Vaginal plugs were checked  
965 daily at 6:00am, and the day of plug detection was noted as embryonic day 0.5 (e0.5).  
966 Mothers were anesthetised with a 0.3 mL intra-peritoneal injection of Ketamine/Xylazine  
967 solution. Embryos were dissected in ice-cold 1x phosphate-buffered saline (1x PBS),  
968 transferred to 4% paraformaldehyde in 1x PBS (4 °C) and left to fix for two hours on a  
969 moving shaker (except *Ptf1a*<sup>Cre/Cre</sup> and *Ascl1*<sup>GFP/GFP</sup> embryos which were fixed for one  
970 hour). After fixation, embryos were washed briefly in 1x PBS, then cryoprotected in 30%  
971 sucrose for 1-2 days or until sunk. Embryos were harvested and fixed on the following  
972 embryonic days: *TrkA*<sup>-/-</sup> on e14.5, *Ptf1a*<sup>Cre/Cre</sup> and *Ascl1*<sup>GFP/GFP</sup> both on e11.5 and e14.5,  
973 *Hoxb8*<sup>Cre</sup>; *Phox2a*<sup>ff</sup>; *R26*<sup>LSL-tdT/+</sup> on E11.5 and E16.5, and *Phox2a*<sup>Cre</sup>; *R26*<sup>LSL-tdT/+</sup> on e9.5,  
974 e10.5, e11.5, e12.5, e13.0, e13.5, e14.5, e15.5, e16.5 and e18.5.

975 **Acquisition of human embryonic spinal cords:**

976 Human embryos were obtained with the parent's written informed consent (Gynaecology  
977 Hospital Jeanne de Flandres, Lille, France) with approval of the local ethic committee.  
978 Tissues were made available via the INSERM-funded Human Developmental Cell Atlas  
979 resource (HuDeCA) in accordance with the French bylaw (Good practice concerning the  
980 conservation, transformation and transportation of human tissue to be used  
981 therapeutically, published on December 29, 1998). Permission to use human tissues was  
982 obtained from the French agency for biomedical research (Agence de la Biomédecine,  
983 Saint-Denis La Plaine, France). Human embryo spinal cords were fixed by immersion for  
984 12–24 hours in 4% paraformaldehyde in 0.12 M phosphate buffer, pH 7.4 (PFA) over  
985 night at 4 °C. Samples were cryoprotected in a solution of 10% sucrose in 0.12 M  
986 phosphate buffer (pH7.2), frozen in isopentane at 50 °C and then cut at 20 µm with a  
987 cryostat (NX70 Thermo Fisher). Spinal cords from five separate embryos were used in  
988 this study: two from G.W. 7.3, and one each from G.W. 7.4, 8.0 and 8.4.

989

990 **METHOD DETAILS:**

991

992 **Neuronal birthdating:**

993 Pregnant female mice were given an i.p. injection of BrdU on e9.5, e10.5, e11.5 or e12.5  
994 and embryos were harvested and fixed at e11.5, e12.5, e13.5 or e16.5. The BrdU dose  
995 was 50 mg/kg for all time points except e9.5, where this dose produced ubiquitous  
996 BrdU+ immunoreactivity in the spinal cord and thus was reduced to 25 mg/kg.

997

998 **Stereotaxic surgery:**

999 Prior to surgery mice were given 1 mg/kg buprenorphine for analgesia, then anaesthetised  
1000 using a mixture of 5% isoflurane in oxygen and maintained using 2% isoflurane in  
1001 oxygen. Eyes were coated in eye ointment to prevent drying during anaesthesia. Prior to  
1002 incision, the top of the head was shaved and decontaminated using an iodine solution.  
1003 Mice were fitted into a stereotaxic frame with digital coordinate display and an incision  
1004 was made longitudinally along the scalp to bare skull sutures. Injections were made via a  
1005 hole drilled in the skull, which was made using medial-lateral and anterior-posterior  
1006 coordinates for underlying brain regions as defined by the coronal Allen Brain reference  
1007 atlas (Dong, 2008). Retrograde tracers (fluorogold or CTb-488) were injected using a 5 µl  
1008 Hamilton syringe fitted with a pulled glass needle backfilled with mineral oil, which were  
1009 injected in the VPL thalamus (coordinates AP -1.7, ML -2.0, DV -3.2), the MD thalamus  
1010 (AP -1.25, ML -0.4, DV -3.2), or the parabrachial nucleus (AP -5.35, ML -1.4, DV -  
1011 3.05), identified using the coronal Allen Brain reference atlas (Allen Institute for Brain  
1012 Science, 2004). Injection volumes of 500 µl (fluorogold, 2%) were injected into the VPL  
1013 and 300 µl (CTb-488, 1%) into the MD thalamus or parabrachial nucleus. The needle was  
1014 left in place for 5 minutes before slowly withdrawing to prevent reflux. The incision was  
1015 then stitched together using silk sutures and mice were allowed to recover under a heating  
1016 lamp before being returned to their home cage.

1017

1018 **Mouse behavioural assays:**

1019 R. B. R. performed all behavioural assays, and was blinded to genotypes. R. B. R. and M.  
1020 B. analysed video-recorded mouse behaviour, though each experimenter analyzed equal

1021 numbers of mice from each sex and genotype per assay. Mice of both sexes were used in  
1022 each behavioural assay. Mice from control and Phox2a<sup>ckO</sup> groups were always littermates  
1023 and the same sex, to prevent confounding effects of litter versus sex. Control and  
1024 Phox2a<sup>ckO</sup> groups thus always contained an equal proportion of mice from each sex, and  
1025 the proportion of male to female mice within groups was kept as close to 50% as  
1026 possible, constrained only by the number of Phox2a<sup>ckO</sup> mice generated (at an expected  
1027 rate of 12.5% in a given litter). Mice were habituated in a dedicated mouse behaviour  
1028 room for at least 30 minutes prior to onset of tests. Mice received no other treatments  
1029 other than the test itself. Mice were habituated in a small plexiglass chamber measuring 4  
1030 cm long, 2.2 cm wide and 2.5 cm high for von Frey, radiant heat paw-withdrawal,  
1031 acetone and adhesive removal tests. For the von Frey and acetone tests, the chambers  
1032 were placed atop a perforated stainless steel floor due to the need for physical hind paw  
1033 manipulations. For the radiant heat paw-withdrawal and adhesive removal test, the  
1034 chambers were placed atop a transparent glass sheet. For all other assays mice were  
1035 habituated in their home cages. When necessary, all behavioural tests were filmed using  
1036 an iPhone SE except for the temperature preference assay, where the video camera  
1037 included in the apparatus was used.

1038       The **von Frey test** involved using a set of nylon filaments (0.008, 0.02, 0.04, 0.07,  
1039 0.16, 0.4, 0.6, 1.0, 1.4 g) to stimulate the hind paw plantar surface of each mouse in order  
1040 to determine the median force which produces a withdrawal reflex. Mice were tested with  
1041 a series of filaments using the “up-down” method of Dixon, as described previously  
1042 (Chaplan et al., 1994; Mogil et al., 1999), with an inter-trial interval of at least 5 minutes.

1043           The radiant heat paw-withdrawal (**Hargreaves**) test involved stimulating the hind  
1044 paw plantar surface from below with a focused beam of light (set to 10% maximum  
1045 intensity of the machine) and verifying latency to withdraw either hind paw. Each hind  
1046 paw was stimulated eight times (16 total stimulations), and data was represented as the  
1047 average of 16 withdrawal latencies, with an inter-trial interval of at least 2 minutes,  
1048 performed as previously described (Hargreaves et al., 1988; Mogil et al., 1999).

1049           The **hot water tail-withdrawal** test was performed as described previously  
1050 (Mogil et al., 1999). Mice were placed in a small cloth pouch into which they entered  
1051 voluntarily, the distal portion of the tail was dipped into a hot water bath maintained at  
1052  $49\pm 1$  °C and the latency to withdraw the tail was recorded. Mice were tested three times  
1053 with an inter-trial interval of at least 2 minutes, and data was represented as the average  
1054 of 3 withdrawal latencies.

1055           The **adhesive removal test** was performed as described previously (Bouet et al.,  
1056 2009). Mice were tested on five consecutive days for the ability/motivation to remove an  
1057 adhesive placed on the plantar surface of the hind paw. The adhesive was half of a 1.5 ml  
1058 Eppendorf tube cap label, cut into a semicircle, and placed on the plantar surface. The  
1059 latency to remove the label was recorded to the nearest minute, and these data were  
1060 reported exactly as recorded (with only one test per day and no averaging between trials).  
1061 If mice did not remove the adhesive within 30 minutes of the start of the test, latency was  
1062 recorded as “30 minutes” for the purpose of data analysis, and mice were then returned to  
1063 their home cage.

1064           The **two-plate temperature preference assay** was performed as described  
1065 previously (Minett et al., 2012). Two temperature-controlled metal plates were abutted

1066 together within a plexiglass enclosure. Mice were given the choice to travel between a  
1067 probe temperature plate and a control temperature (always 30 °C) plate for 10 minutes  
1068 and the time spent per plate, distance traveled per plate and transitions between plates  
1069 were recorded via a video camera above the enclosure (included with apparatus) and  
1070 analyzed automatically via the accompanying software. Mice were tested twice for each  
1071 probe temperature, and data for time/distance/transitions were represented as the average  
1072 of both trials. In order to prevent mice from associating one plate as the control plate, the  
1073 control plate was switched for each trial. Moreover, between testing for different probe  
1074 temperatures, the initial position of the control plate was switched with the probe plate to  
1075 prevent mice from associating the order of trials with the location of the control plate. As  
1076 well, to encourage mice to sample both plates, mice were placed randomly on either the  
1077 control plate or the probe plate for the first trial, and this order was then switched for the  
1078 second trial.

1079         The **hot-plate test** was performed as described previously (Mogil et al., 1999),  
1080 and the **cold-plate test** was performed using similar methods. Mice were placed within  
1081 the hot-cold plate apparatus (IITC PE34) on a stainless-steel metal plate heated to  $53\pm 0.1$   
1082 °C or cooled to  $0\pm 0.1$  °C and were video-recorded from the side (with a mirror opposite  
1083 the test chamber to view each side of the mouse) for 60 seconds at which point they were  
1084 returned to their home cage. The latency to either lick the hind paw, flutter of the hind  
1085 paw or to attempt to escape via jumping was recorded. Additional behaviours were  
1086 recorded: total time spent licking either hind paw, total hind paw licking episodes, total  
1087 jumps and total hind paw flutters. Mice were tested once, and data were represented  
1088 directly based on behaviours recorded in one 60-second trial. Entirely different cohorts of

1089 mice were used for the hot and cold-plate tests respectively, to prevent behavioural  
1090 adaptation to the test.

1091       The **acetone test** was performed as described previously (Colburn et al., 2007).  
1092 Briefly, the mouse's hind paw was stimulated with a drop of acetone extruded from the  
1093 blunt end of a 1ml syringe. Mice were recorded for 60 seconds following the application,  
1094 and total time spent licking was recorded as well as the magnitude of behaviour on a 0–2  
1095 scale as reported previously (Colburn et al., 2007). Mice were stimulated 5 times, with an  
1096 inter-trial interval of at least 5 minutes. Total licking time was reported as a sum of 5  
1097 trials, and the behavioural score (0–2) was reported as an average of 5 trials.

1098       The **foot clip test** was performed as described previously (Huang et al., 2019).  
1099 Briefly, a toothless mechanical clip was used to pinch skin on the plantar surface of the  
1100 hind paw, and mice were placed in a plexiglass cylinder (dimensions) on the glass sheet  
1101 used previously and video recorded from below for 60 seconds (this recording setup is  
1102 identical to the following formalin and capsaicin tests). The total amount of time licking  
1103 the clipped hind paw was recorded, and data is presented as the total time licking during  
1104 the one trial.

1105       The **capsaicin and formalin tests** (Mogil et al., 1999; Sakurada et al., 1992) were  
1106 performed similarly – mice were injected with approximately 20 µl of capsaicin solution  
1107 (1.5 µg/20 µl in 1x PBS) or formalin solution (2% in 1x PBS) in the plantar surface of the  
1108 right hind paw using a standard 28G insulin syringe (BD) and video recorded from below  
1109 for either 15 or 60 minutes respectively. Mice were tested only once on each test, with  
1110 different cohorts of mice used for each respective test. Data were represented as time  
1111 spent licking the injected hind paw. For formalin-injected animals, these data were

1112 analyzed separately acutely after injection (0–10 minutes) or chronically after injection  
1113 (11–60 minutes).

1114

1115 **Tissue fixation, freezing and sectioning:**

1116 Adult mice were first anesthetised with a 0.3 ml i.p injection of Ketamine/Xylazine  
1117 solution (10 mg/ml Ketamine, 1 mg/ml Xylazine, in 0.9% saline). Transcardial perfusion  
1118 was done with a peristaltic pump (Gilson miniPuls2). Mice were perfused with 10 ml of  
1119 ice cold 1x PBS followed by 20 ml of ice cold 4% PFA in 1x PBS. Brains and spinal  
1120 cords were dissected and post-fixed in 4% PFA in 1x PBS at 4 °C for two hours, washed  
1121 briefly in 1x PBS, and acclimated to 30% sucrose for 1–2 days or until sunk. After  
1122 cryoprotection, tissue was frozen in OCT Compound and cryosectioned at -22 °C. Tissue  
1123 was cut into 25 µm sections for all experiments other than RNA Scope, in which case 10  
1124 µm sections were used, and those involving *Ptfla*<sup>CRE</sup> and *Ascl1*<sup>GFP</sup> lines where 30 µm  
1125 sections were used.

1126

1127 **Immunohistochemistry:**

1128 For mouse tissue, sections were heated at 37 °C for 15 minutes prior to  
1129 immunohistochemistry. Following this, sections were washed three times in 1x PBS for  
1130 10 minutes, blocked using a solution of 5% heat-inactivated horse serum (HIHS) and  
1131 0.1% Triton X-100 in 1x PBS (0.1% tPBS) for 30 minutes, and incubated with a primary  
1132 antibody solution (in 1% HIHS, 0.1% tPBS) overnight at 4 °C. The following day,  
1133 sections were again washed three times in 1x PBS for 10 minutes, and incubated with a  
1134 secondary antibody solution (in 1% HIHS, 0.1% tPBS) at room temperature for 1 hour.



1135 Following this, sections were washed three more times in 1x PBS for 10 minutes and  
1136 coverslipped using a Mowiol solution (10% Mowiol - Sigma, 25% glycerol). Slides were  
1137 allowed to dry in the dark at room temperature and subsequently imaged using  
1138 fluorescent microscopy. For immunohistochemistry involving the anti-BrdU antibody,  
1139 two rounds of immunohistochemistry were done: the first round involved staining for  
1140 RFP or Phox2a and the second round for BrdU with some modifications. Prior to the anti-  
1141 BrdU primary antibody incubation, slides were treated in a 2 N hydrochloric acid solution  
1142 at 37 °C for 30 minutes. Subsequently, slides were neutralized by washing in a Tris-  
1143 buffered saline solution (pH 8.5, 50 mM Tris, 150 mM NaCl) for 10 minutes at room  
1144 temperature, after which primary antibody incubation was done. BrdU  
1145 immunohistochemistry proceeded in two steps, as acid denaturation of DNA reveals anti-  
1146 BrdU epitopes but destroys RFP/Phox2a epitopes; however, acid denaturation does not  
1147 destroy secondary antibody-conjugated fluorophores from the first round of  
1148 immunohistochemistry. Immunohistochemistry on human tissue was performed on  
1149 cryostat sections after blocking in 0.2% gelatin in PBS containing 0.25% Triton-X100  
1150 (Sigma). Sections were then incubated overnight with respective primary antibodies, all  
1151 used at 1:500 dilutions, followed by 2 hours incubation in appropriate secondary  
1152 antibodies.

1153

#### 1154 **In situ-hybridisation (ISH):**

1155 ISH was done using RNA Scope® Multiplex Fluorescent v2 kits, according to  
1156 manufacturer's instructions. All experiments used Mm-Phox2a-C2 coupled to Opal™  
1157 520, Mm-Lmx1b-C3 coupled to Opal™ 690, and all other candidate probes being

1158 compared to *Phox2a* (all Mm C1 probes) were coupled to Opal™ 570.

1159

1160 ***In-ovo* chicken electroporation and tissue processing:**

1161 Fertilized White Leghorn eggs were obtained from the Texas A&M Poultry Department

1162 (College Station, TX, USA) and incubated for 48 hours at 39°C. The supercoiled reporter

1163 plasmid *ePhox2a-GFP* was diluted to 1.5 mg/mL in H<sub>2</sub>O/1X loading dye and injected

1164 into the lumen of the closed neural tube at stages Hamburger-Hamilton (HH) stages 13-

1165 15 (~E2) along with either a *pMiWIII-Myc* epitope tagged plasmid serving as an

1166 electroporation control or the same plasmid containing the coding region of *Ascl1*, *Ptf1a*,

1167 or *Prdm13* (Hamburger and Hamilton, 1951). The injected embryos were then

1168 electroporated with 5 pulses of 25 mV each for 50 msec with intervals of 100 msec.

1169 Embryos were harvested 48 hours later at HH stages 22–23 (~E4), fixed with 4%

1170 paraformaldehyde for 45 minutes, and processed for cryosectioning and

1171 immunofluorescence.

1172

1173 **Generation of reporter constructs and expression vectors:**

1174 Previously published ChIP-seq data for *Ascl1*, *Ptf1a*, *Rbpj*, and *Prdm13* (Borromeo et al.,

1175 2014; Meredith et al., 2013; Mona et al., 2017) (GSE55840; GSE90938) were used to

1176 identify a putative enhancer for *Phox2a* in the chicken dorsal neural tube. A 851 bp

1177 region (chr7:101834344–101835194 from mm10) encompassing two peaks bound by

1178 *Ascl1* and *Ptf1a* was cloned into the MCSIII GFP reporter cassette (*ePhox2a-GFP*). This

1179 reporter cassette contains the *β-globin* minimal promoter, a nuclear localised fluorescence

1180 reporter, and the 3' cassette from the human growth hormone. The *ePhox2a* sequence

1181 was PCR amplified from ICR mouse DNA. *Prdm13*, *<sup>myc</sup>Ptf1a*, and *<sup>myc</sup>Ascl1* were  
1182 expressed in the pMiWIII expression vector (Chang et al., 2013; Gowan et al., 2001;  
1183 Matsunaga et al., 2001). All constructs were sequence-verified and expression of the  
1184 transcription factor confirmed by immunohistochemistry with antibodies to the myc tag  
1185 or with factor-specific antibodies.

1186

### 1187 **Epifluorescence and Confocal Microscopy:**

1188 Micrographs of tissue sections were taken either with epifluorescence microscopes (Leica  
1189 DM6, DM6000) or confocal microscopes (Leica SP8 or Zeiss LSM710). Whole embryo  
1190 images were taken with a fluorescence dissecting stereomicroscope (Leica MZ16FA). All  
1191 RNA Scope images, for quantification and for analysis, were taken using confocal  
1192 microscopes on a 40x objective in order to resolve single puncta.  
1193 Human sections were imaged with a laser scanning confocal microscope (FV1000,  
1194 Olympus) and processed using ImageJ (NIH) and Adobe Photoshop.

1195

### 1196 **QUANTIFICATION AND STATISTICAL ANALYSIS:**

1197

1198 **Bioinformatics:** scRNA-seq data used in this study were previously published (Delile et  
1199 al., 2019), using spinal cord cells from e9.5, e10.5, e11.5, e12.5 and e13.5 mouse  
1200 embryos and processed via the 10x Genomics Chromium Single Cell 3' v2 protocol. Raw  
1201 data were extracted from ArrayExpress E-MTAB-7320). CellRanger v 2.1.1 (Zheng et  
1202 al., 2017) was used to align reads to the 10X mm10 mouse reference genome v2.1.0,  
1203 filter barcodes and quantify genes. Biological replicates from the same time points were

1204 then merged using CellRanger's *aggregate* function. All downstream analyses were  
1205 performed on these 41 009 cells, using the Seurat v.3.1.1. R package.

1206

1207         Using Delile *et al.*'s (2019) annotation, only cells classified as neurons were kept  
1208 for further analysis (18 048 cells). From these, data for each timepoint was normalized  
1209 and highly variable genes identified using SCTransform's normalization and variance  
1210 stabilizing methods (Hafemeister and Satija, 2019). Different timepoints were then  
1211 integrated using CCA (Stuart et al., 2019). From the integrated dataset, 2 subsets were  
1212 created: 1) all cells expressing *Lmx1b* (*Lmx1b+*) were isolated (2614 cells) and 2) all  
1213 early (e9.5, e10.5 and e11.5) *Lmx1b+* cells (186 cells). For each of these subsets,  
1214 dimensionality reduction (PCA and UMAP) was applied and clusters identified using  
1215 Seurat's SNN modularity optimisation-based clustering Louvain algorithm. Differential  
1216 expression analysis was performed on the non-integrated assay to identify markers for  
1217 each cluster (Wilcoxon Rank Sum test).

1218

1219         A differential expression analysis was then performed on clusters of interest in  
1220 each of these 3 subsets (cluster 6 from *Lmx1b+* cells and clusters 2 and 3 in early *Lmx1b+*  
1221 cells). Each of these clusters was compared to all other neuron cells in order to identify  
1222 specific markers within these clusters. This analysis was limited to genes which had on  
1223 average, at least 0.1 log-Fold difference between the two groups compared and present in  
1224 at least 10% of cells of either group. Markers were then considered significantly  
1225 differentially expressed if adjusted p-values < 0.05.

1226

1227 **Cell counts:** All cell counts were done with Image J v.2.0.0 software, using the cell  
1228 counter plugin. Data was recorded and sorted in Microsoft Excel.

1229

1230 **Animal Behaviour:** Video-recordings of mice were quantified by R.B.R and M.B using  
1231 Aegisub (free subtitling software), which includes video annotation functions allowing  
1232 precise start and stop times for specified behaviours to be recorded. Data was exported  
1233 and then sorted in Microsoft Excel.

1234

1235 **Data representation:** Graphs display data points from individual animals (hollow  
1236 circles), mean data from all animals (bars), and  $\pm$  standard error of the mean (error bars).

1237

1238 **Numbers:** All numbers are noted in figure legends. In all experiments using adult mice, n  
1239 represents unique individuals. In all experiments using embryonic mice, n represents  
1240 unique embryos. No data represented as single ns have been pooled from multiple  
1241 individual animals.

1242

1243 **Statistics:** All statistical analyses were performed using GraphPad Prism v8.3.0 software,  
1244 except those involving single cell RNA-Seq data processing, which are described in  
1245 Bioinformatics (above). Statistical tests used are described in figure legends. Significance  
1246 is represented as ns: non significant, \*:  $p < 0.05$ , \*\*:  $p < 0.01$  or \*\*\*:  $p < 0.001$ .

1247

1248

1249 **DATA AND CODE AVAILABILITY:**

1250 The published article includes all datasets/code generated during this study. Single cell  
1251 RNA-Seq data analyzed here was generated by Delile et al. (2019) and was obtained per  
1252 their instructions from Array Express (<https://www.ebi.ac.uk/arrayexpress/>) with  
1253 accession number “E-MTAB-7320”.

1254 **KEY RESOURCES TABLE**

| REAGENT or RESOURCE                                                  | SOURCE                                                         | IDENTIFIER                                      |
|----------------------------------------------------------------------|----------------------------------------------------------------|-------------------------------------------------|
| Antibodies                                                           |                                                                |                                                 |
| Rabbit anti-Phox2a (1:10,000 from frozen stock, Fig. 1-6)            | Jean-François Brunet (École normale supérieure, Paris, France) | (Tiveron et al., 1996)<br>RRID:<br>AB_2315159   |
| Rabbit anti-Phox2a (Fig.7, 1:1000 for mouse, 1:500 for human embryo) | Abcam                                                          | Cat#: Ab155084<br>Lot#: GR117345-3<br>RRID: N/A |
| Rabbit anti-Phox2b (1:10,000 from frozen stock)                      | Jean-François Brunet (École normale supérieure, Paris, France) | (Pattyn et al., 1997)<br>RRID:<br>AB_2315160    |
| Rabbit anti-RFP (red fluorescent protein) (1:1000)                   | Rockland                                                       | Cat#: 600-401-379<br>RRID:<br>AB_2209751        |
| Mouse anti-NeuN (1:1000)                                             | Millipore                                                      | Cat#: MAB377<br>RRID:<br>AB_2298772             |
| Guinea Pig anti-vGlut2 (1:1000)                                      | Synaptic Systems                                               | Cat#: 135-404<br>RRID:<br>AB_887884             |
| Rat anti-Bromodeoxyuridine (BrdU) (1:10,000)                         | Abcam                                                          | Cat# ab6326:<br>RRID:<br>AB_305426              |
| Goat anti-rTrkA (1:1000 for mouse, 1:500 for human embryo)           | R&D Systems                                                    | Cat#: Af1056<br>RRID:<br>AB_2283049             |
| Mouse anti-Islet1 (1:100)                                            | Developmental Studies Hybridoma Bank (DSHB)                    | Cat#: 39.3F7<br>RRID:<br>AB_1157901             |
| Mouse anti-Pax7 (1:100)                                              | DSHB                                                           | Cat#: pax7<br>RRID:<br>AB_528428                |
| Mouse anti-Lhx2 (1:100)                                              | DSHB                                                           | Cat#: Lhx2-1C11<br>RRID:<br>AB_2618817          |
| Mouse anti-Nkx6.1 (1:100)                                            | DSHB                                                           | Cat#: F55A10<br>RRID:<br>AB_532378              |
| Mouse anti-Neurofilament-L                                           | DSHB                                                           | Cat#: 2H3<br>RRID:<br>AB_531793                 |

|                                                                                     |                                                                           |                                         |
|-------------------------------------------------------------------------------------|---------------------------------------------------------------------------|-----------------------------------------|
| Goat anti-hPax2 (1:1000 for mouse, 1:500 for human embryo)                          | R&D Systems                                                               | Cat#: AF3364<br>RRID:<br>AB_10889828    |
| Guinea Pig anti-Lbx1 (1:10000 for mouse, 1:5000 for human embryo)                   | Carmen Birchmeier<br>(Max Delbruck Center, Berlin, Germany)               | RRID:<br>AB_2532144                     |
| Guinea Pig anti-Lmx1b (1:10000 for mouse, 1:5000 for human embryo)                  | Carmen Birchmeier<br>(Max Delbruck Center, Berlin, Germany)               | RRID:<br>AB_2314752                     |
| Guinea Pig anti-Tlx3 (1:10000 in mouse, 1:10000 for chick, 1:5000 for human embryo) | Carmen Birchmeier<br>(Max Delbruck Center, Berlin, Germany)               | RRID:AB_253214<br>5                     |
| Guinea pig anti-PRDM13 (1:1000)                                                     | Takahisa Furukawa<br>(Osaka University, Osaka, Japan)                     | Watanabe et al.,<br>2015<br>RRID: N/A   |
| Guinea pig anti-PTF1A (1:10000)                                                     | Jane Johnson<br>(University of Texas Southwestern, Dallas, United States) | TX507<br>RRID: N/A                      |
| Mouse anti-MYC (1:1000)                                                             | Abcam                                                                     | Cat# ab32<br>RRID:<br>AB_303599         |
| Goat anti-Brn3b (Pou4F2), (1:1000 for mouse, 1:500 for human embryo)                | Santa Cruz Biotechnology                                                  | Cat#: sc-6026<br>RRID:<br>AB_673441     |
| Mouse anti-Ascl1 (1:100)                                                            | Santa Cruz Biotechnology                                                  | Cat#: sc-390794<br>RRID: N/A            |
| Mouse anti-Ascl1 (1:100)                                                            | Santa Cruz Biotechnology                                                  | Cat#: sc-374550<br>RRID:<br>AB_10985986 |
| Mouse anti-Ascl1 (1:100)                                                            | Santa Cruz Biotechnology                                                  | Cat# sc-374104<br>RRID:<br>AB_10918561  |
| Goat anti-hRobo3                                                                    | R&D Systems                                                               | Cat# AF3076<br>RRID:<br>AB_2181865      |
| Goat anti-mDcc                                                                      | R&D Systems                                                               | Cat# AF844<br>RRID:<br>AB_2089765       |



|                                          |                                                                                                  |                                                          |
|------------------------------------------|--------------------------------------------------------------------------------------------------|----------------------------------------------------------|
| Rat anti-Pou6F2 (1:2000)                 | Jay Bikoff (Thomas Jessell Laboratory, HHMI Columbia University, New York, United States)        | Cat# CU1796<br>RRID:<br>AB_2665427                       |
| Rabbit anti-Shox2 (1:200)                | Laskaro Zagoraiou (Thomas Jessell Laboratory, HHMI Columbia University, New York, United States) | (Dougherty et al., 2013)<br>RRID: N/A                    |
| Sheep anti-FoxP2 (1:2000)                | R&D Systems                                                                                      | Cat#: AF5647<br>RRID:<br>AB_2107133                      |
| Alexa 488 Donkey anti-Rabbit (1:500)     | Jackson Immunoresearch Laboratories                                                              | Cat#: 711-545-152<br>Lot#: 141848<br>RRID:<br>AB_2313584 |
| Alexa 488 Donkey anti-Guinea Pig (1:500) | Jackson Immunoresearch Laboratories                                                              | Cat#: 706-545-148<br>Lot#: 138058<br>RRID:<br>AB_2340472 |
| Alexa 488 Donkey anti-Mouse (1:500)      | Jackson Immunoresearch Laboratories                                                              | Cat#: 715-545-150<br>Lot#: 136831<br>RRID:<br>AB_2340846 |
| Alexa 488 Donkey anti-Goat (1:500)       | Jackson Immunoresearch Laboratories                                                              | Cat#: 705-545-147<br>Lot#: 136089<br>RRID:<br>AB_2336933 |
| Alexa 488 Donkey anti-Rat (1:500)        | Jackson Immunoresearch Laboratories                                                              | Cat#: 712-545-153<br>Lot#: 138117<br>RRID:<br>AB_2340684 |
| Alexa 488 Donkey anti-Sheep (1:500)      | Jackson Immunoresearch Laboratories                                                              | Cat#: 713-545-003<br>Lot#: N/A<br>RRID:<br>AB_2340744    |
| Cy3 Donkey anti-Rat (1:500)              | Jackson Immunoresearch Laboratories                                                              | Cat#: 712-165-153<br>Lot#: 139289<br>RRID:<br>AB_2340667 |
| Cy3 Donkey anti-Rabbit (1:500)           | Jackson Immunoresearch Laboratories                                                              | Cat#: 711-165-152<br>Lot#: 138270<br>RRID:<br>AB_2307443 |

|                                                      |                                     |                                                       |
|------------------------------------------------------|-------------------------------------|-------------------------------------------------------|
| Cy3 Donkey anti-Mouse (1:500)                        | Jackson Immunoresearch Laboratories | Cat#: 715-165-150<br>Lot#: N/A<br>RRID: AB_2340813    |
| Cy3 Donkey anti-Goat (1:500)                         | Jackson Immunoresearch Laboratories | Cat#: 705-165-147<br>Lot#: 134527<br>RRID: AB_2307351 |
| Cy5 Donkey anti-Rabbit (1:500)                       | Jackson Immunoresearch Laboratories | Cat#: 711-175-152<br>Lot#: 138336<br>RRID: AB_2340607 |
| Cy5 Donkey anti-Mouse (1:500)                        | Jackson Immunoresearch Laboratories | Cat#: 715-175-150<br>Lot#: 135323<br>RRID: AB_2340819 |
| Cy5 Donkey anti-Goat (1:500)                         | Jackson Immunoresearch Laboratories | Cat#: 705-175-147<br>Lot#: 134531<br>RRID: AB_2340415 |
| Cy5 Donkey anti-Guinea Pig (1:500)                   | Jackson Immunoresearch Laboratories | Cat#: 706-175-148<br>Lot#: 136607<br>RRID: AB_2340462 |
| <b>Chemicals, Peptides, and Recombinant Proteins</b> |                                     |                                                       |
| NeuroTrace™ 435/455 Blue Fluorescent Nissl Stain     | Thermofisher Scientific             | Cat#: N21479<br>RRID: N/A                             |
| NeuroTrace™ 500/525 Green Fluorescent Nissl Stain    | Thermofisher Scientific             | Cat#: N21480<br>RRID: N/A                             |
| 2-Hydroxystilbene-4,4'-dicarboximidine (fluorogold)  | Thermofisher Scientific             | Cat#: H22845<br>RRID: N/A                             |
| Alexa 488-conjugated Cholera toxin B                 | Thermofisher Scientific             | Cat#: C22841<br>Lot#: 2038245<br>RRID: N/A            |
| 5-bromo-2'-deoxyuridine (BrdU)                       | Thermofisher Scientific             | Cat#: B23151<br>Lot#: 1916418<br>RRID: N/A            |
| Paraformaldehyde                                     | Millipore Sigma                     | Cat#: P6148<br>RRID: N/A                              |
| (E)-Capsaicin                                        | Tocris                              | Cat#: 0462<br>Lot#: 7A/218361<br>RRID: N/A            |
| 4',6-diamidino-2-phenylindole (DAPI)                 | Thermo Fisher Scientific            | Cat# D1306                                            |

|                                                                     |                                                                                    |                                                                   |
|---------------------------------------------------------------------|------------------------------------------------------------------------------------|-------------------------------------------------------------------|
| Mowiol (Polyvinyl alcohol)                                          | Millipore Sigma                                                                    | Cat#: 81381<br>RRID: N/A                                          |
| <b>Experimental Models: Organisms/Strains</b>                       |                                                                                    |                                                                   |
| Mice - Phox2a <sup>Cre</sup>                                        | This manuscript                                                                    | RRID: N/A                                                         |
| Mice - HoxB8 <sup>Cre</sup><br>(Tg(Hoxb8-cre)1403Uze)               | Hanns Ulrich<br>Zeilhofer, ETH<br>Zürich, Zürich,<br>Switzerland)                  | Cat#: MGI:<br>4881836<br>RRID: N/A                                |
| Mice - Cdx2 <sup>FlpO</sup><br>(Tg(CDX2-flpo)#Gld)                  | Martyn Goulding<br>(Salk Institute, San<br>Diego, United<br>States)                | Cat#: MGI:<br>5911680<br>RRID: N/A                                |
| Mice - Ai14<br>(B6;129S6-Gt(ROSA)26Sortm14(CAG-<br>tdTomato)Hze/J)  | The Jackson<br>Laboratory                                                          | Cat#: JAX:007908<br>RRID:IMSR_JAX:<br>007908                      |
| Mice - Ai65<br>(B6;129S-Gt(ROSA)26Sortm65.1(CAG-<br>tdTomato)Hze/J) | The Jackson<br>Laboratory                                                          | Cat#: JAX:021875<br>RRID:IMSR_JAX:<br>021875                      |
| Mice - Phox2alox<br>(B6D2.129S2-Phox2atm2Jbr/Orl)                   | European Mutant<br>Mouse Archive<br>(EMMA)                                         | Cat#: EM:04758<br>RRID:IMSR_EM:<br>04758                          |
| Mice - TrkA <sup>-/-</sup><br>(Ntrk1 <sup>tm1Par</sup> )            | Lino Tessarollo<br>(National Cancer<br>Institute, Frederick,<br>MD, United States) | (Liebl et al., 2000)<br>Cat#: MGI:<br>1933963<br>RRID: N/A        |
| <i>Ptfla</i> <sup>tm1</sup> (cre)Wri                                | Christopher Wright<br>(Vanderbilt<br>University,<br>Nashville, United<br>States)   | (Kawaguchi et al.,<br>2002)<br>Cat#: MGI:<br>2387812<br>RRID: N/A |
| <i>Ascl1</i> <sup>tm1Reed</sup> /J                                  | The Jackson<br>Laboratory                                                          | Cat# JAX:012881<br>RRID:IMSR_JAX:<br>012881                       |
| Mice - C57BL/6J                                                     | The Jackson<br>Laboratory                                                          | Cat# JAX:000664<br>RRID:IMSR_JAX:<br>000664                       |
| Mice - 129S1/SvImJ                                                  | The Jackson<br>Laboratory                                                          | Cat# JAX:002448<br>RRID:IMSR_JAX:<br>002448                       |
| Mice - B6C3F1/J                                                     | The Jackson<br>Laboratory                                                          | Cat# JAX: 100010<br>RRID:IMSR_JAX:<br>100010                      |
| <b>Oligonucleotides</b>                                             |                                                                                    |                                                                   |

|                                                                 |                           |                                           |
|-----------------------------------------------------------------|---------------------------|-------------------------------------------|
| RNA Scope Probe – Mm-Tac1 C1                                    | Advanced Cell Diagnostics | Cat#: 410351<br>Lot#: 18354A<br>RRID: N/A |
| RNA Scope Probe – Mm-Phox2a C2                                  | Advanced Cell Diagnostics | Cat#: 520371-C2<br>Lot#: N/A<br>RRID: N/A |
| RNA Scope Probe – Mm-Lmx1b C3                                   | Advanced Cell Diagnostics | Cat#: 412931-C3<br>Lot#: N/A<br>RRID: N/A |
| RNA Scope Probe – Mm-Nms C1                                     | Advanced Cell Diagnostics | Cat#: 472331<br>Lot#: TBD<br>RRID: N/A    |
| RNA Scope Probe – Mm-Tm4sf4 C1                                  | Advanced Cell Diagnostics | Cat#: 819831<br>Lot#: N/A<br>RRID: N/A    |
| RNA Scope Probe – Mm-Zim1 C1                                    | Advanced Cell Diagnostics | Cat#: 819821<br>Lot#: N/A<br>RRID: N/A    |
| RNA Scope Probe – Mm-Scn9a C1                                   | Advanced Cell Diagnostics | Cat#: 313341<br>Lot#: N/A<br>RRID: N/A    |
| RNA Scope Probe – Mm-Pdzn3 C1                                   | Advanced Cell Diagnostics | Cat#: 517061<br>Lot#: 17269A<br>RRID: N/A |
| RNA Scope Probe – Mm-Syt4 C1                                    | Advanced Cell Diagnostics | Cat#: 574731<br>Lot#: N/A<br>RRID: N/A    |
| RNA Scope Probe – Mm-VIP C1 (Vasoactive Intestinal Polypeptide) | Advanced Cell Diagnostics | Cat#: 415961<br>Lot#: 19045A<br>RRID: N/A |
| RNA Scope Probe – Mm-Sst C1                                     | Advanced Cell Diagnostics | Cat#: 404631<br>Lot#: N/A<br>RRID: N/A    |
| RNA Scope Probe – Mm-TacR3 C1                                   | Advanced Cell Diagnostics | Cat#: 481671<br>Lot#: 18254A<br>RRID: N/A |
| RNA Scope Probe – Mm-Crh C1                                     | Advanced Cell Diagnostics | Cat#: 316091<br>Lot#: N/A<br>RRID: N/A    |
| RNA Scope Probe – Mm-Slc17A6 C1 (vGlut2)                        | Advanced Cell Diagnostics | Cat#: 319171<br>Lot#: 19052B<br>RRID: N/A |
| RNA Scope Probe – Mm-Slc32A1 C1 (vGAT)                          | Advanced Cell Diagnostics | Cat#: 319191<br>Lot#: 19057A<br>RRID: N/A |

|                                                                                               |                                                            |                                           |
|-----------------------------------------------------------------------------------------------|------------------------------------------------------------|-------------------------------------------|
| RNA Scope Probe – Mm-TacR1 C1                                                                 | Advanced Cell Diagnostics                                  | Cat#: 428781<br>Lot#: 19057A<br>RRID: N/A |
| RNA Scope Probe – Mm-Cck C1 (Cholecystokinin)                                                 | Advanced Cell Diagnostics                                  | Cat#: 402271<br>Lot#: 19057A<br>RRID: N/A |
| RNA Scope Probe – Mm-Lypd1 C1                                                                 | Advanced Cell Diagnostics                                  | Cat#: 318361<br>Lot#: 18353B<br>RRID: N/A |
| RNA Scope Probe – Mm-Gal C1 (Galanin)                                                         | Advanced Cell Diagnostics                                  | Cat#: 400961<br>Lot#: 18277C<br>RRID: N/A |
| RNA Scope Probe – Mm-pDyn C1 (preproDynorphin)                                                | Advanced Cell Diagnostics                                  | Cat#: 318771<br>Lot#: 18303A<br>RRID: N/A |
| RNA Scope Probe – Mm-pNoc C1 (prepronociceptin)                                               | Advanced Cell Diagnostics                                  | Cat#: 437881<br>Lot#: 19016B<br>RRID: N/A |
| <b>Genotyping primers</b>                                                                     |                                                            |                                           |
| Cre-1:<br>5'-AGG TGT AGA GAA GGC ACT TAG C -3'<br>Expected band size: 412 bp (only one band)  | This manuscript                                            | N/A                                       |
| Cre-2:<br>5'-CTA ATC GCC ATC TTC CAG CAG G-3'                                                 | This manuscript                                            | N/A                                       |
| FLPo-1:<br>5'-TGA GCT TCG ACA TCG TGA AC-3'<br>Expected band size: 350 bp (only one band)     | Martyn Goulding (Salk Institute, San Diego, United States) | N/A                                       |
| FLPo-2:<br>5'-ACA GGG TCT TGG TCT TGG TG -3'                                                  | Martyn Goulding (Salk Institute, San Diego, United States) | N/A                                       |
| Ai14-1:<br>5'-TCA ATG GGC GGG GGT CGT T-3'<br>Expected band sizes: WT: 350 bp, Mutant: 250 bp | This manuscript                                            | N/A                                       |
| Ai14-2:<br>5'-CTC TGC TGC CTC CTG GCT TCT-3'                                                  | This manuscript                                            | N/A                                       |
| Ai14-3:<br>5'-CGA GGC GGA TCA CAA GCA ATA-3'                                                  | This manuscript                                            | N/A                                       |
| Ai65 WT1: "oIMR9020"<br>5'-AAG GGA GCT GCA GTG GAG TA-3'<br>Expected band size: 315 bp        | The Jackson Laboratory                                     | N/A                                       |
| Ai65 WT2: "oIMR9021"<br>5'-CCG AAA ATC TGT GGG AAG TC-3'                                      | The Jackson Laboratory                                     | N/A                                       |

|                                                                                                                        |                                                                           |     |
|------------------------------------------------------------------------------------------------------------------------|---------------------------------------------------------------------------|-----|
| Ai65 Mutant1: “oIMR9103”<br>5'-GGC ATT AAA GCA GCG TAT CC-3'<br>Expected band size: 297 bp                             | The Jackson Laboratory                                                    | N/A |
| Ai65 Mutant2: “oIMR9105”<br>5'-CTG TTC CTG TAC GGC ATG G-3'                                                            | The Jackson Laboratory                                                    | N/A |
| Phox2a <sup>fl</sup> -1:<br>5'-GCC TCC AAC TCC ATA TTC C-3'<br>Expected band sizes: WT: 150bp, Flox: 200bp             | Jean-François Brunet (École normale supérieure, Paris, France)            | N/A |
| Phox2a <sup>fl</sup> -2:<br>5'-ATC AGG AGT CAG TCG TCT G -3'                                                           | Jean-François Brunet (École normale supérieure, Paris, France)            | N/A |
| TrkA-WT-5':<br>5'-TGT ACG GCC ATA GAT AAG CAT-3'<br>Expected WT band size: 160 bp                                      | Lino Tessarollo (National Cancer Institute, Frederick, MD, United States) | N/A |
| TrkA-WT-3':<br>5'-TTG CAT AAC TGT GTA TTT CAC-3'                                                                       | Lino Tessarollo (National Cancer Institute, Frederick, MD, United States) | N/A |
| TrkA-mutant (pGKneopolyA) forward primer:<br>5'-CGC CTT CTT GAC GAG TTC TTC TG-3'<br>Expected mutant band size: 550 bp | Lino Tessarollo (National Cancer Institute, Frederick, MD, United States) | N/A |
| <b>Recombinant DNA</b>                                                                                                 |                                                                           |     |
| Plasmid: pMiWIII-Myc- ASCL1                                                                                            | Jane Johnson (University of Texas Southwestern, Dallas, United States)    | N/A |
| Plasmid: pMiWIII-Myc- PTF1A                                                                                            | Jane Johnson (University of Texas Southwestern, Dallas, United States)    | N/A |
| Plasmid: pMiWIII-Prdm13                                                                                                | Jane Johnson (University of Texas Southwestern, Dallas, United States)    | N/A |
| Plasmid: pMiWIII-Myc-tag                                                                                               | Jane Johnson (University of Texas Southwestern, Dallas, United States)    | N/A |

|                                                                                     |                                                                                                                                                                                     |                                                                                                                                                  |
|-------------------------------------------------------------------------------------|-------------------------------------------------------------------------------------------------------------------------------------------------------------------------------------|--------------------------------------------------------------------------------------------------------------------------------------------------|
| Plasmid: pMCSIII-ePhox2a                                                            | This manuscript                                                                                                                                                                     | N/A                                                                                                                                              |
| <b>Software and Algorithms</b>                                                      |                                                                                                                                                                                     |                                                                                                                                                  |
| Graphpad Prism 8 (macOS) – Version 8.3.0                                            | Graphpad Software                                                                                                                                                                   | <a href="https://www.graphpad.com/scientific-software/prism/">https://www.graphpad.com/scientific-software/prism/</a><br>RRID:<br>SCR_002798     |
| Bioseb T2CT – Version 2.2.4                                                         | Bioseb                                                                                                                                                                              | <a href="https://www.bioseb.com/bioseb/anglais/default/software.php">https://www.bioseb.com/bioseb/anglais/default/software.php</a><br>RRID: N/A |
| Image J – Version 2.0.0                                                             | National Institutes of Health                                                                                                                                                       | <a href="https://imagej.nih.gov/ij/">https://imagej.nih.gov/ij/</a><br>RRID:<br>SCR_003070                                                       |
| Photoshop and Illustrator                                                           | Adobe                                                                                                                                                                               | N/A                                                                                                                                              |
| Excel for Mac 2011 v14.7.7                                                          | Microsoft                                                                                                                                                                           | N/A                                                                                                                                              |
| Aegisub v3.2.2                                                                      | Aegisub                                                                                                                                                                             | <a href="http://www.aegisub.org/">http://www.aegisub.org/</a>                                                                                    |
| <b>Other</b>                                                                        |                                                                                                                                                                                     |                                                                                                                                                  |
| Stereotaxic frame and digital display                                               | David Kopf Instruments                                                                                                                                                              | Cat#s: 940, 960, 1770, 900C, 922, 933-B<br>RRID: N/A                                                                                             |
| Stereotaxic syringe pump with Micro4 controller                                     | David Kopf Instruments                                                                                                                                                              | Cat#s: UMP3-1, 1770-C<br>RRID: N/A                                                                                                               |
| Touch Test Sensory Evaluators (0.008, 0.02, 0.04, 0.07, 0.16, 0.4, 0.6, 1, 1.4, 2g) | North Coast Medical                                                                                                                                                                 | Cat#: NC12775-01 - NC12775-10<br>RRID: N/A                                                                                                       |
| IITC Hot Cold-Plate Analgesia Meter for Mice and Rats                               | IITC                                                                                                                                                                                | Cat#: PE34<br>RRID: N/A                                                                                                                          |
| Thermal Place Preference, 2 Temperatures Choice Nociception Test                    | Bioseb                                                                                                                                                                              | Cat#: BIO-T2CT<br>RRID: N/A                                                                                                                      |
| iPhone SE – Version 12.3.1                                                          | Apple                                                                                                                                                                               | Cat#: iPhone SE<br>RRID: N/A                                                                                                                     |
| Micro Toothless Alligator Test Clip (Copper Plated)                                 | <a href="https://www.amazon.com/Toothless-Alligator-Copper-Plated-Microscopic/dp/B0187MIUU4">https://www.amazon.com/Toothless-Alligator-Copper-Plated-Microscopic/dp/B0187MIUU4</a> | Cat#: CECOMINOD005515<br>RRID: N/A                                                                                                               |
| Confocal Microscope                                                                 | Zeiss                                                                                                                                                                               | Cat#: LSM-710                                                                                                                                    |
| Confocal Microscope                                                                 | Leica                                                                                                                                                                               | Cat#: SP8                                                                                                                                        |

|                                             |       |              |
|---------------------------------------------|-------|--------------|
| Epifluorescence Upright Microscope          | Leica | Cat#: DM6000 |
| Epifluorescence Upright Microscope          | Leica | Cat#: DM6    |
| Epifluorescence Dissecting Stereomicroscope | Leica | Cat#: MZ16FA |

1255

1256



1257 **References:**

- 1258 Allen Institute for Brain Science (2004). © 2004 Allen Institute for Brain Science. Allen  
1259 Mouse Brain Atlas. Available from: <https://mouse.brain-map.org/static/atlas>.  
1260 Allen Institute for Brain Science (2008). © 2008 Allen Institute for Brain Science. Allen  
1261 Spinal Cord Atlas. Available from: [<http://mousespinal.brain-map.org/>].  
1262 Altman, J., and Bayer, S.A. (2001). *Development of the Human Spinal Cord: An*  
1263 *Interpretation Based on Experimental Studies in Animals* (Oxford University Press).  
1264 Anderson, K.R., Singer, R.A., Balderes, D.A., Hernandez-Lagunas, L., Johnson, C.W.,  
1265 Artinger, K.B., and Sussel, L. (2011). The L6 domain tetraspanin Tm4sf4 regulates  
1266 endocrine pancreas differentiation and directed cell migration. *Development* 138, 3213-  
1267 3224.  
1268 Andrew, D., and Craig, A.D. (2001). Spinothalamic lamina I neurons selectively sensitive  
1269 to histamine: a central neural pathway for itch. *Nat Neurosci* 4, 72-77.  
1270 Apkarian, A.V., Stevens, R.T., and Hodge, C.J. (1985). Funicular location of ascending  
1271 axons of lamina I cells in the cat spinal cord. *Brain Res* 334, 160-164.  
1272 Arber, S. (2012). Motor circuits in action: specification, connectivity, and function.  
1273 *Neuron* 74, 975-989.  
1274 Bernard, J.F., Dallel, R., Raboisson, P., Villanueva, L., and Le Bars, D. (1995).  
1275 Organization of the efferent projections from the spinal cervical enlargement to the  
1276 parabrachial area and periaqueductal gray: a PHA-L study in the rat. *J Comp Neurol* 353,  
1277 480-505.  
1278 Berthier, M., Starkstein, S., and Leiguarda, R. (1988). Asymbolia for pain: a sensory-  
1279 limbic disconnection syndrome. *Ann Neurol* 24, 41-49.  
1280 Borromeo, M.D., Meredith, D.M., Castro, D.S., Chang, J.C., Tung, K.C., Guillemot, F.,  
1281 and Johnson, J.E. (2014). A transcription factor network specifying inhibitory versus  
1282 excitatory neurons in the dorsal spinal cord. *Development* 141, 2803-2812.  
1283 Bouet, V., Boulouard, M., Toutain, J., Divoux, D., Bernaudin, M., Schumann-Bard, P.,  
1284 and Freret, T. (2009). The adhesive removal test: a sensitive method to assess  
1285 sensorimotor deficits in mice. *Nat Protoc* 4, 1560-1564.  
1286 Bourgeois, L., Monconduit, L., Villanueva, L., and Bernard, J.F. (2001). Parabrachial  
1287 internal lateral neurons convey nociceptive messages from the deep laminae of the dorsal  
1288 horn to the intralaminar thalamus. *J Neurosci* 21, 2159-2165.  
1289 Britz, O., Zhang, J., Grossmann, K.S., Dyck, J., Kim, J.C., Dymecki, S., Gosgnach, S.,  
1290 and Goulding, M. (2015). A genetically defined asymmetry underlies the inhibitory  
1291 control of flexor-extensor locomotor movements. *Elife* 4.  
1292 Brunet, J.F., and Pattyn, A. (2002). Phox2 genes - from patterning to connectivity. *Curr*  
1293 *Opin Genet Dev* 12, 435-440.  
1294 Cameron, D., Polgar, E., Gutierrez-Mecinas, M., Gomez-Lima, M., Watanabe, M., and  
1295 Todd, A.J. (2015). The organisation of spinoparabrachial neurons in the mouse. *Pain* 156,  
1296 2061-2071.  
1297 Chang, J.C., Meredith, D.M., Mayer, P.R., Borromeo, M.D., Lai, H.C., Ou, Y.H., and  
1298 Johnson, J.E. (2013). Prdm13 mediates the balance of inhibitory and excitatory neurons  
1299 in somatosensory circuits. *Dev Cell* 25, 182-195.  
1300 Chaplan, S.R., Bach, F.W., Pogrel, J.W., Chung, J.M., and Yaksh, T.L. (1994).  
1301 Quantitative assessment of tactile allodynia in the rat paw. *J Neurosci Methods* 53, 55-63.

1302 Colburn, R.W., Lubin, M.L., Stone, D.J., Jr., Wang, Y., Lawrence, D., D'Andrea, M.R.,  
1303 Brandt, M.R., Liu, Y., Flores, C.M., and Qin, N. (2007). Attenuated cold sensitivity in  
1304 TRPM8 null mice. *Neuron* 54, 379-386.  
1305 Cox, J.J., Reimann, F., Nicholas, A.K., Thornton, G., Roberts, E., Springell, K., Karbani,  
1306 G., Jafri, H., Mannan, J., Raashid, Y., *et al.* (2006). An SCN9A channelopathy causes  
1307 congenital inability to experience pain. *Nature* 444, 894-898.  
1308 Craig, A.D. (1996). An ascending general homeostatic afferent pathway originating in  
1309 lamina I. *Prog Brain Res* 107, 225-242.  
1310 Craig, A.D. (2003a). A new view of pain as a homeostatic emotion. *Trends Neurosci* 26,  
1311 303-307.  
1312 Craig, A.D. (2003b). Pain mechanisms: labeled lines versus convergence in central  
1313 processing. *Annu Rev Neurosci* 26, 1-30.  
1314 Craig, A.D. (2004). Lamina I, but not lamina V, spinothalamic neurons exhibit responses  
1315 that correspond with burning pain. *J Neurophysiol* 92, 2604-2609.  
1316 Craig, A.D., and Serrano, L.P. (1994). Effects of systemic morphine on lamina I  
1317 spinothalamic tract neurons in the cat. *Brain Res* 636, 233-244.  
1318 da Silva, R.V., Johannssen, H.C., Wyss, M.T., Roome, R.B., Bourojeni, F.B., Stifani, N.,  
1319 Marsh, A.P.L., Ryan, M.M., Lockhart, P.J., Leventer, R.J., *et al.* (2018). DCC Is  
1320 Required for the Development of Nociceptive Topognosis in Mice and Humans. *Cell Rep*  
1321 22, 1105-1114.  
1322 Davidson, S., Truong, H., and Giesler, G.J., Jr. (2010). Quantitative analysis of  
1323 spinothalamic tract neurons in adult and developing mouse. *The Journal of comparative*  
1324 *neurology* 518, 3193-3204.  
1325 Delile, J., Rayon, T., Melchionda, M., Edwards, A., Briscoe, J., and Sagner, A. (2019).  
1326 Single cell transcriptomics reveals spatial and temporal dynamics of gene expression in  
1327 the developing mouse spinal cord. *Development* 146.  
1328 Ding, Y.Q., Kim, J.Y., Xu, Y.S., Rao, Y., and Chen, Z.F. (2005). Ventral migration of  
1329 early-born neurons requires Dcc and is essential for the projections of primary afferents  
1330 in the spinal cord. *Development* 132, 2047-2056.  
1331 Ding, Y.Q., Yin, J., Kania, A., Zhao, Z.Q., Johnson, R.L., and Chen, Z.F. (2004). Lmx1b  
1332 controls the differentiation and migration of the superficial dorsal horn neurons of the  
1333 spinal cord. *Development* 131, 3693-3703.  
1334 Dong, H.W. (2008). The Allen reference atlas: A digital color brain atlas of the C57Bl/6J  
1335 male mouse (John Wiley & Sons Inc).  
1336 Duan, B., Cheng, L., Bourane, S., Britz, O., Padilla, C., Garcia-Campmany, L., Krashes,  
1337 M., Knowlton, W., Velasquez, T., Ren, X., *et al.* (2014). Identification of spinal circuits  
1338 transmitting and gating mechanical pain. *Cell* 159, 1417-1432.  
1339 Fan, Y., Chen, P., Raza, M.U., Szebeni, A., Szebeni, K., Ordway, G.A., Stockmeier,  
1340 C.A., and Zhu, M.Y. (2018). Altered Expression of Phox2 Transcription Factors in the  
1341 Locus Coeruleus in Major Depressive Disorder Mimicked by Chronic Stress and  
1342 Corticosterone Treatment In Vivo and In Vitro. *Neuroscience* 393, 123-137.  
1343 Fazeli, A., Dickinson, S.L., Hermiston, M.L., Tighe, R.V., Steen, R.G., Small, C.G.,  
1344 Stoeckli, E.T., Keino-Masu, K., Masu, M., Rayburn, H., *et al.* (1997). Phenotype of mice  
1345 lacking functional Deleted in colorectal cancer (Dcc) gene. *Nature* 386, 796-804.

- 1346 Feil, K., and Herbert, H. (1995). Topographic organization of spinal and trigeminal  
1347 somatosensory pathways to the rat parabrachial and Kolliker-Fuse nuclei. *J Comp Neurol*  
1348 *353*, 506-528.
- 1349 Fernandes, E.C., Santos, I.C., Kokai, E., Luz, L.L., Szucs, P., and Safronov, B.V. (2018).  
1350 Low- and high-threshold primary afferent inputs to spinal lamina III antenna-type  
1351 neurons. *Pain* *159*, 2214-2222.
- 1352 Freeman, W., and Watts, J.W. (1948). Pain mechanisms and the frontal lobes; a study of  
1353 prefrontal lobotomy for intractable pain. *Ann Intern Med* *28*, 747-754.
- 1354 Gauriau, C., and Bernard, J.F. (2004). A comparative reappraisal of projections from the  
1355 superficial laminae of the dorsal horn in the rat: the forebrain. *J Comp Neurol* *468*, 24-56.
- 1356 GENSAT (2008). The Gene Expression Nervous System Atlas (GENSAT) Project,  
1357 NINDS Contracts N01NS02331 & HHSN271200723701C to The Rockefeller University  
1358 (New York, NY). Available from:  
1359 <http://www.gensat.org/GeneProgressTracker.jsp?gensatGeneID=1715>.
- 1360 Glasgow, S.M., Henke, R.M., Macdonald, R.J., Wright, C.V., and Johnson, J.E. (2005).  
1361 Ptf1a determines GABAergic over glutamatergic neuronal cell fate in the spinal cord  
1362 dorsal horn. *Development* *132*, 5461-5469.
- 1363 Goulding, M. (2009). Circuits controlling vertebrate locomotion: moving in a new  
1364 direction. *Nat Rev Neurosci* *10*, 507-518.
- 1365 Gowan, K., Helms, A.W., Hunsaker, T.L., Collisson, T., Ebert, P.J., Odom, R., and  
1366 Johnson, J.E. (2001). Crossinhibitory activities of Ngn1 and Math1 allow specification of  
1367 distinct dorsal interneurons. *Neuron* *31*, 219-232.
- 1368 Guilbaud, G., Peschanski, M., Gautron, M., and Binder, D. (1980). Neurones responding  
1369 to noxious stimulation in VB complex and caudal adjacent regions in the thalamus of the  
1370 rat. *Pain* *8*, 303-318.
- 1371 Hafemeister, C., and Satija, R. (2019). Normalization and variance stabilization of single-  
1372 cell RNA-seq data using regularized negative binomial regression. *Genome Biol* *20*, 296.
- 1373 Hamburger, V., and Hamilton, H.L. (1951). A series of normal stages in the development  
1374 of the chick embryo. *J Morphol* *88*, 49-92.
- 1375 Han, S., Soleiman, M.T., Soden, M.E., Zweifel, L.S., and Palmiter, R.D. (2015).  
1376 Elucidating an Affective Pain Circuit that Creates a Threat Memory. *Cell* *162*, 363-374.
- 1377 Hargreaves, K., Dubner, R., Brown, F., Flores, C., and Joris, J. (1988). A new and  
1378 sensitive method for measuring thermal nociception in cutaneous hyperalgesia. *Pain* *32*,  
1379 77-88.
- 1380 Helms, A.W., Battiste, J., Henke, R.M., Nakada, Y., Simplicio, N., Guillemot, F., and  
1381 Johnson, J.E. (2005). Sequential roles for Mash1 and Ngn2 in the generation of dorsal  
1382 spinal cord interneurons. *Development* *132*, 2709-2719.
- 1383 Hori, K., Cholewa-Waclaw, J., Nakada, Y., Glasgow, S.M., Masui, T., Henke, R.M.,  
1384 Wildner, H., Martarelli, B., Beres, T.M., Epstein, J.A., *et al.* (2008). A nonclassical  
1385 bHLH Rbpj transcription factor complex is required for specification of GABAergic  
1386 neurons independent of Notch signaling. *Genes Dev* *22*, 166-178.
- 1387 Hua, Z.L., Jeon, S., Caterina, M.J., and Nathans, J. (2014). Frizzled3 is required for the  
1388 development of multiple axon tracts in the mouse central nervous system. *Proc Natl Acad*  
1389 *Sci U S A* *111*, E3005-3014.

- 1390 Huang, T., Lin, S.H., Malewicz, N.M., Zhang, Y., Zhang, Y., Goulding, M., LaMotte,  
1391 R.H., and Ma, Q. (2019). Identifying the pathways required for coping behaviours  
1392 associated with sustained pain. *Nature* 565, 86-90.
- 1393 Hyndman, O.R., and Jarvis, F.J. (1940). Gastric crisis of tabes dorsalis: Treatment by  
1394 anterior chordotomy in eight cases. *Archives of Surgery* 40, 997-1013.
- 1395 Hyndman, O.R., and Wolkin, J. (1943). Anterior chordotomy: Further observations on  
1396 physiologic results and optimum manner of performance. *Archives of Neurology &*  
1397 *Psychiatry* 50, 129-148.
- 1398 Kawaguchi, Y., Cooper, B., Gannon, M., Ray, M., MacDonald, R.J., and Wright, C.V.  
1399 (2002). The role of the transcriptional regulator Ptf1a in converting intestinal to  
1400 pancreatic progenitors. *Nat Genet* 32, 128-134.
- 1401 Keay, K.A., and Bandler, R. (2002). Distinct central representations of inescapable and  
1402 escapable pain: observations and speculation. *Exp Physiol* 87, 275-279.
- 1403 Kim, E.J., Battiste, J., Nakagawa, Y., and Johnson, J.E. (2008). *Ascl1* (*Mash1*) lineage  
1404 cells contribute to discrete cell populations in CNS architecture. *Mol Cell Neurosci* 38,  
1405 595-606.
- 1406 Kitamura, T., Yamada, J., Sato, H., and Yamashita, K. (1993). Cells of origin of the  
1407 spinoparabrachial fibers in the rat: a study with fast blue and WGA-HRP. *J Comp Neurol*  
1408 328, 449-461.
- 1409 Kohwi, M., and Doe, C.Q. (2013). Temporal fate specification and neural progenitor  
1410 competence during development. *Nat Rev Neurosci* 14, 823-838.
- 1411 Lai, H.C., Seal, R.P., and Johnson, J.E. (2016). Making sense out of spinal cord  
1412 somatosensory development. *Development* 143, 3434-3448.
- 1413 Leah, J., Menetrey, D., and de Pommery, J. (1988). neuropeptides in long ascending  
1414 spinal tract cells in the rat: evidence for parallel processing of ascending information.  
1415 *Neuroscience* 24, 195-207.
- 1416 Leung, C.T., Coulombe, P.A., and Reed, R.R. (2007). Contribution of olfactory neural  
1417 stem cells to tissue maintenance and regeneration. *Nat Neurosci* 10, 720-726.
- 1418 Mantyh, P.W., Rogers, S.D., Honore, P., Allen, B.J., Ghilardi, J.R., Li, J., Daughters,  
1419 R.S., Lappi, D.A., Wiley, R.G., and Simone, D.A. (1997). Inhibition of hyperalgesia by  
1420 ablation of lamina I spinal neurons expressing the substance P receptor. *Science* 278,  
1421 275-279.
- 1422 Marshall, G.E., Shehab, S.A., Spike, R.C., and Todd, A.J. (1996). Neurokinin-1 receptors  
1423 on lumbar spinothalamic neurons in the rat. *Neuroscience* 72, 255-263.
- 1424 Masullo, L., Mariotti, L., Alexandre, N., Freire-Pritchett, P., Boulanger, J., and Tripodi,  
1425 M. (2019). Genetically Defined Functional Modules for Spatial Orienting in the Mouse  
1426 Superior Colliculus. *Curr Biol* 29, 2892-2904.e2898.
- 1427 Matsunaga, E., Araki, I., and Nakamura, H. (2001). Role of Pax3/7 in the tectum  
1428 regionalization. *Development* 128, 4069-4077.
- 1429 McMahon, S.B., and Wall, P.D. (1983). A system of rat spinal cord lamina 1 cells  
1430 projecting through the contralateral dorsolateral funiculus. *J Comp Neurol* 214, 217-223.
- 1431 Melzack, R., and Casey, K.L. (1968). Sensory, Motivational, and Central Control  
1432 Determinants of Pain: A new conceptual model. In *The Skin Senses*, D.R. Kenshalo, ed.  
1433 (Charles C. Thomas), pp. 423-439.
- 1434 Meredith, D.M., Borromeo, M.D., Deering, T.G., Casey, B.H., Savage, T.K., Mayer,  
1435 P.R., Hoang, C., Tung, K.C., Kumar, M., Shen, C., *et al.* (2013). Program specificity for

1436 Ptf1a in pancreas versus neural tube development correlates with distinct collaborating  
1437 cofactors and chromatin accessibility. *Mol Cell Biol* 33, 3166-3179.

1438 Minett, M.S., Nassar, M.A., Clark, A.K., Passmore, G., Dickenson, A.H., Wang, F.,  
1439 Malcangio, M., and Wood, J.N. (2012). Distinct Nav1.7-dependent pain sensations  
1440 require different sets of sensory and sympathetic neurons. *Nat Commun* 3, 791.

1441 Mogil, J.S., Wilson, S.G., Bon, K., Lee, S.E., Chung, K., Raber, P., Pieper, J.O., Hain,  
1442 H.S., Belknap, J.K., Hubert, L., *et al.* (1999). Heritability of nociception I: responses of  
1443 11 inbred mouse strains on 12 measures of nociception. *Pain* 80, 67-82.

1444 Mona, B., Uruena, A., Kollipara, R.K., Ma, Z., Borromeo, M.D., Chang, J.C., and  
1445 Johnson, J.E. (2017). Repression by PRDM13 is critical for generating precision in  
1446 neuronal identity. *Elife* 6.

1447 Morin, X., Cremer, H., Hirsch, M.R., Kapur, R.P., Goridis, C., and Brunet, J.F. (1997).  
1448 Defects in sensory and autonomic ganglia and absence of locus coeruleus in mice  
1449 deficient for the homeobox gene *Phox2a*. *Neuron* 18, 411-423.

1450 Nakano, M., Yamada, K., Fain, J., Sener, E.C., Selleck, C.J., Awad, A.H., Zwaan, J.,  
1451 Mullaney, P.B., Bosley, T.M., and Engle, E.C. (2001). Homozygous mutations in  
1452 *ARIX(PHOX2A)* result in congenital fibrosis of the extraocular muscles type 2. *Nat*  
1453 *Genet* 29, 315-320.

1454 Nishida, K., and Ito, S. (2017). Developmental origin of long-range neurons in the  
1455 superficial dorsal spinal cord. *Eur J Neurosci* 46, 2608-2619.

1456 Nornes, H.O., and Carry, M. (1978). Neurogenesis in spinal cord of mouse: an  
1457 autoradiographic analysis. *Brain Res* 159, 1-6.

1458 Pattyn, A., Morin, X., Cremer, H., Goridis, C., and Brunet, J.F. (1997). Expression and  
1459 interactions of the two closely related homeobox genes *Phox2a* and *Phox2b* during  
1460 neurogenesis. *Development* 124, 4065-4075.

1461 Petitjean, H., Bourojeni, F.B., Tsao, D., Davidova, A., Sotocinal, S.G., Mogil, J.S.,  
1462 Kania, A., and Sharif-Naeini, R. (2019). Recruitment of Spinoparabrachial Neurons by  
1463 Dorsal Horn Calretinin Neurons. *Cell Rep* 28, 1429-1438.e1424.

1464 Price, D.D., and Dubner, R. (1977). Neurons that subserve the sensory-discriminative  
1465 aspects of pain. *Pain* 3, 307-338.

1466 Ren, K., and Dubner, R. (2009). Descending Control Mechanisms. In *Science of Pain*,  
1467 A.I. Basbaum, and C. Bushnell, eds. (Elsevier), pp. 723-749.

1468 Rubins, J.L., and Friedman, E.D. (1948). Asymbolia for pain. *Archives of Neurology &*  
1469 *Psychiatry* 60, 554-573.

1470 Sabatier, C., Plump, A.S., Le, M., Brose, K., Tamada, A., Murakami, F., Lee, E.Y., and  
1471 Tessier-Lavigne, M. (2004). The divergent Robo family protein rig-1/Robo3 is a negative  
1472 regulator of slit responsiveness required for midline crossing by commissural axons. *Cell*  
1473 117, 157-169.

1474 Sakurada, T., Katsumata, K., Tan-No, K., Sakurada, S., and Kisara, K. (1992). The  
1475 capsaicin test in mice for evaluating tachykinin antagonists in the spinal cord.  
1476 *Neuropharmacology* 31, 1279-1285.

1477 Schoenen, J. (1982). The dendritic organization of the human spinal cord: the dorsal  
1478 horn. *Neuroscience* 7, 2057-2087.

1479 Smeyne, R.J., Klein, R., Schnapp, A., Long, L.K., Bryant, S., Lewin, A., Lira, S.A., and  
1480 Barbacid, M. (1994). Severe sensory and sympathetic neuropathies in mice carrying a  
1481 disrupted *Trk/NGF* receptor gene. *Nature* 368, 246-249.

1482 Spiller, W.G., and Martin, E. (1912). The treatment of persistent pain of organic origin in  
1483 the lower part of the body by division of the anterolateral column of the spinal cord.  
1484 *Journal of the American Medical Association LVIII*, 1489-1490.  
1485 Stuart, T., Butler, A., Hoffman, P., Hafemeister, C., Papalexi, E., Mauck, W.M., 3rd,  
1486 Hao, Y., Stoeckius, M., Smibert, P., and Satija, R. (2019). Comprehensive Integration of  
1487 Single-Cell Data. *Cell 177*, 1888-1902.e1821.  
1488 Szabo, N.E., da Silva, R.V., Sotocinal, S.G., Zeilhofer, H.U., Mogil, J.S., and Kania, A.  
1489 (2015). Hoxb8 intersection defines a role for Lmx1b in excitatory dorsal horn neuron  
1490 development, spinofugal connectivity, and nociception. *J Neurosci 35*, 5233-5246.  
1491 Wang, X., Babayan, A.H., Basbaum, A.I., and Phelps, P.E. (2012). Loss of the Reelin-  
1492 signaling pathway differentially disrupts heat, mechanical and chemical nociceptive  
1493 processing. *Neuroscience 226*, 441-450.  
1494 Warming, S., Costantino, N., Court, D.L., Jenkins, N.A., and Copeland, N.G. (2005).  
1495 Simple and highly efficient BAC recombineering using galK selection. *Nucleic Acids*  
1496 *Res 33*, e36.  
1497 Watanabe, K., Tamamaki, N., Furuta, T., Ackerman, S.L., Ikenaka, K., and Ono, K.  
1498 (2006). Dorsally derived netrin 1 provides an inhibitory cue and elaborates the 'waiting  
1499 period' for primary sensory axons in the developing spinal cord. *Development 133*, 1379-  
1500 1387.  
1501 Willis, W.D., Kenshalo, D.R., Jr., and Leonard, R.B. (1979). The cells of origin of the  
1502 primate spinothalamic tract. *J Comp Neurol 188*, 543-573.  
1503 Willis, W.D., Trevino, D.L., Coulter, J.D., and Maunz, R.A. (1974). Responses of  
1504 primate spinothalamic tract neurons to natural stimulation of hindlimb. *J Neurophysiol*  
1505 *37*, 358-372.  
1506 Witschi, R., Johansson, T., Morscher, G., Scheurer, L., Deschamps, J., and Zeilhofer,  
1507 H.U. (2010). Hoxb8-Cre mice: A tool for brain-sparing conditional gene deletion.  
1508 *Genesis 48*, 596-602.  
1509 Yvone, G.M., Zhao-Fleming, H.H., Udeochu, J.C., Chavez-Martinez, C.L., Wang, A.,  
1510 Hirose-Ikeda, M., and Phelps, P.E. (2017). Disabled-1 dorsal horn spinal cord neurons  
1511 co-express Lmx1b and function in nociceptive circuits. *Eur J Neurosci 45*, 733-747.  
1512 Zheng, G.X., Terry, J.M., Belgrader, P., Ryvkin, P., Bent, Z.W., Wilson, R., Ziraldo,  
1513 S.B., Wheeler, T.D., McDermott, G.P., Zhu, J., *et al.* (2017). Massively parallel digital  
1514 transcriptional profiling of single cells. *Nat Commun 8*, 14049.  
1515

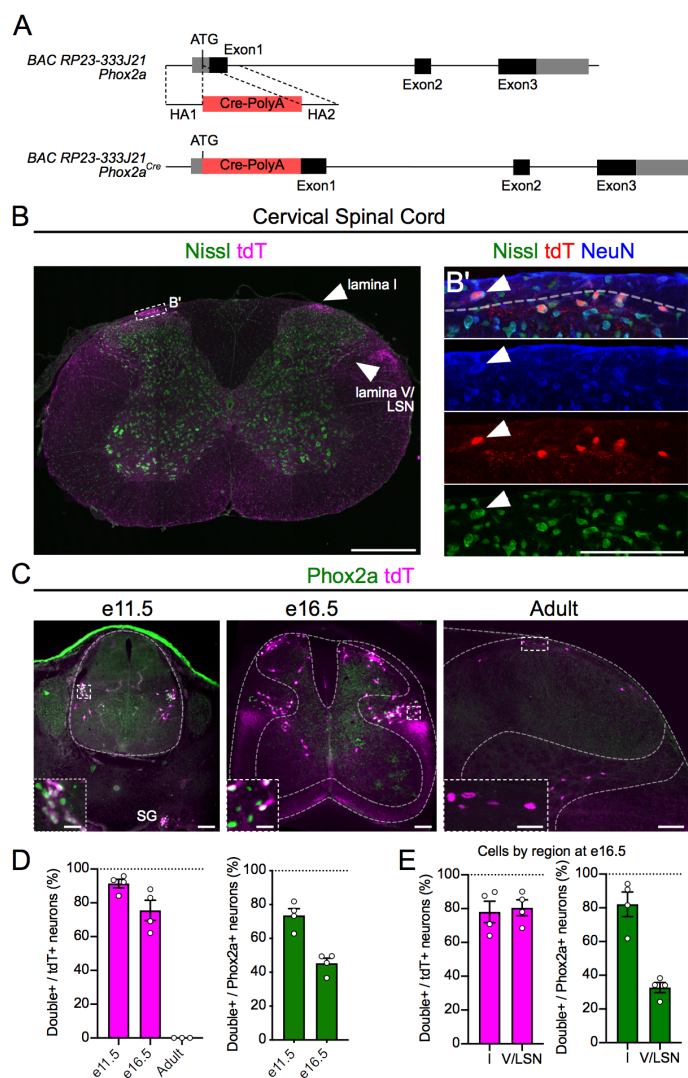

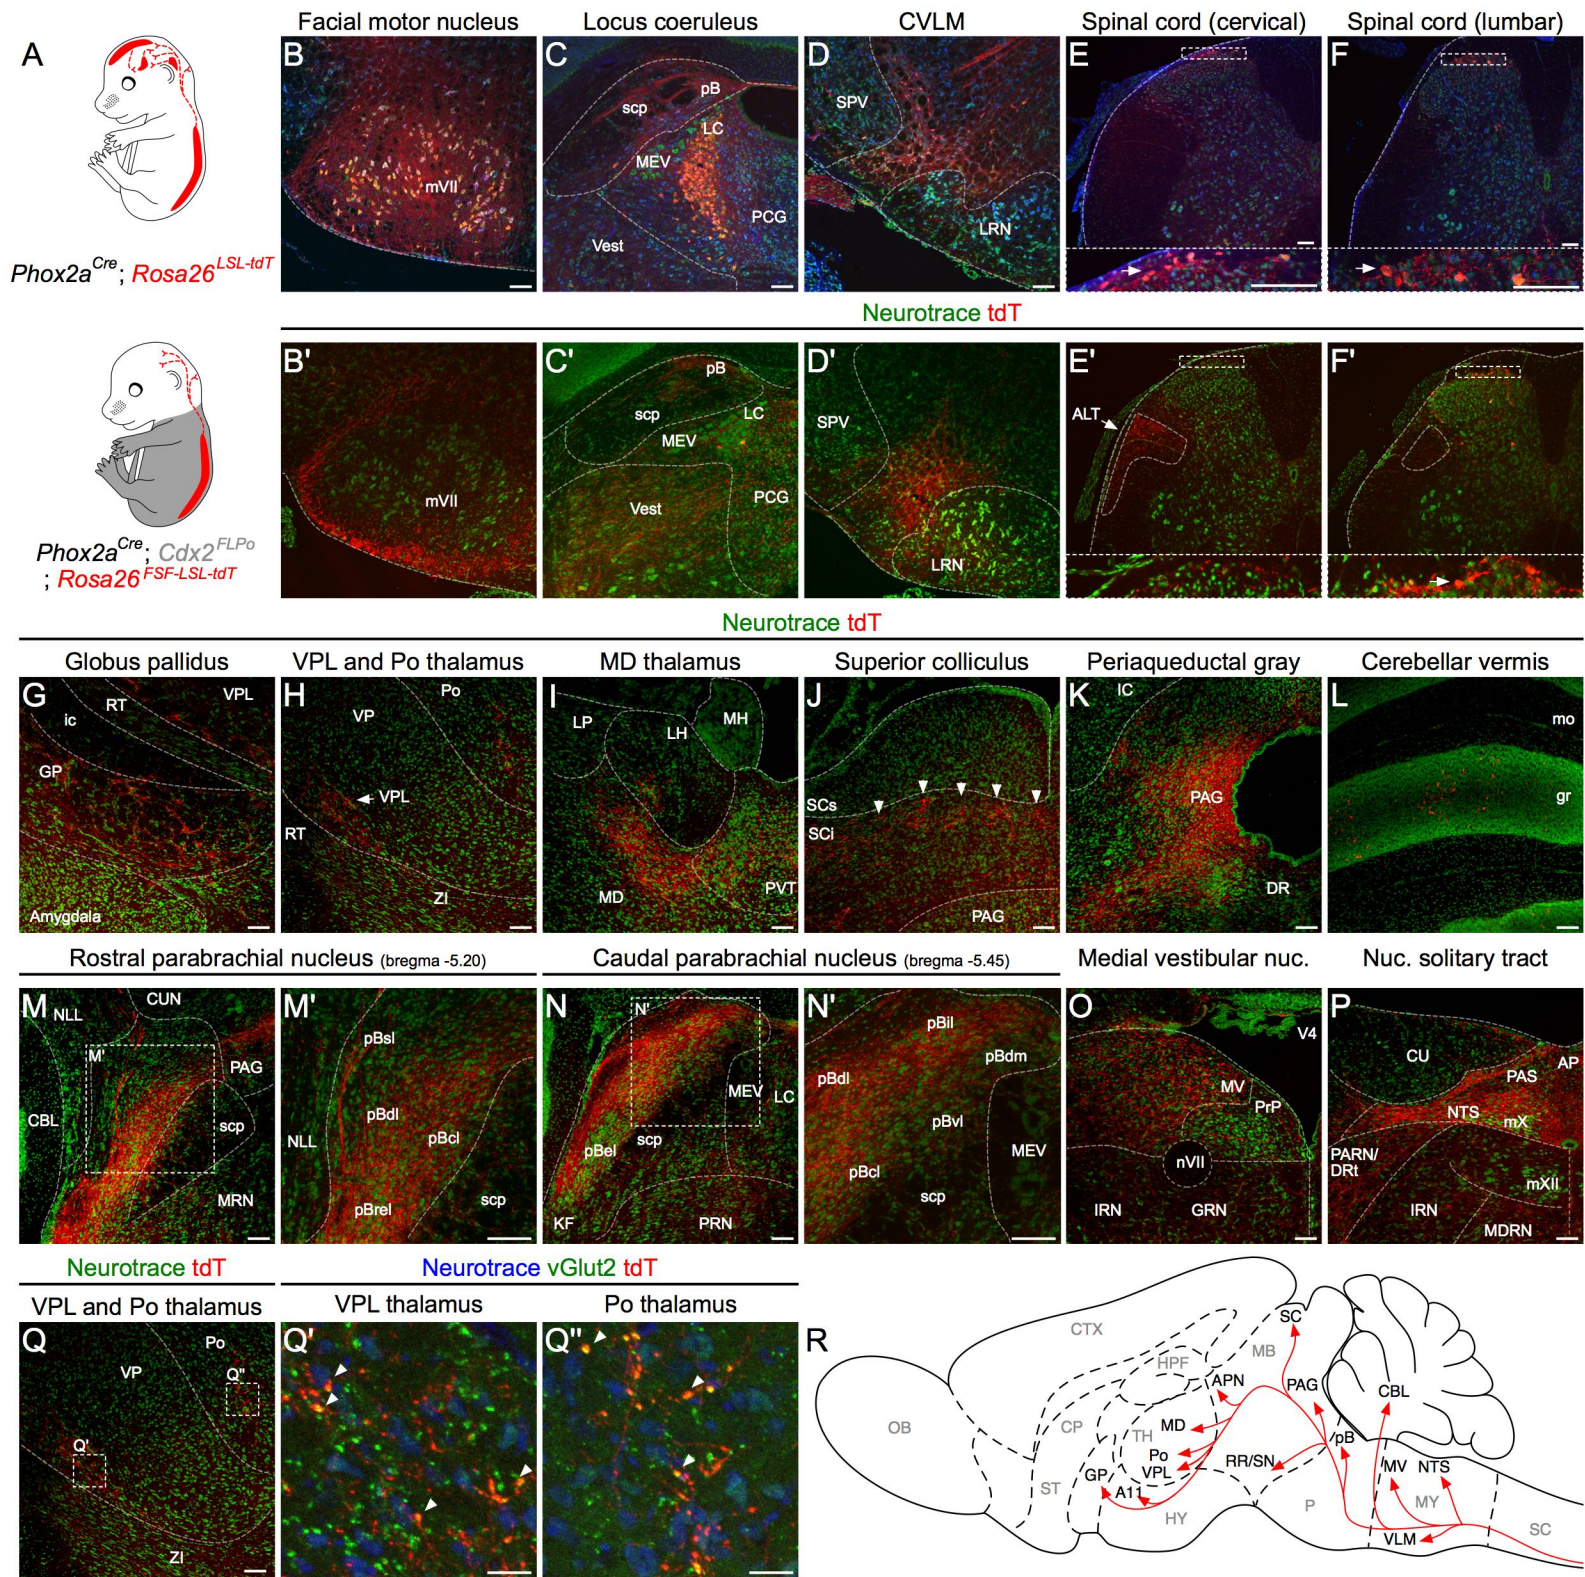



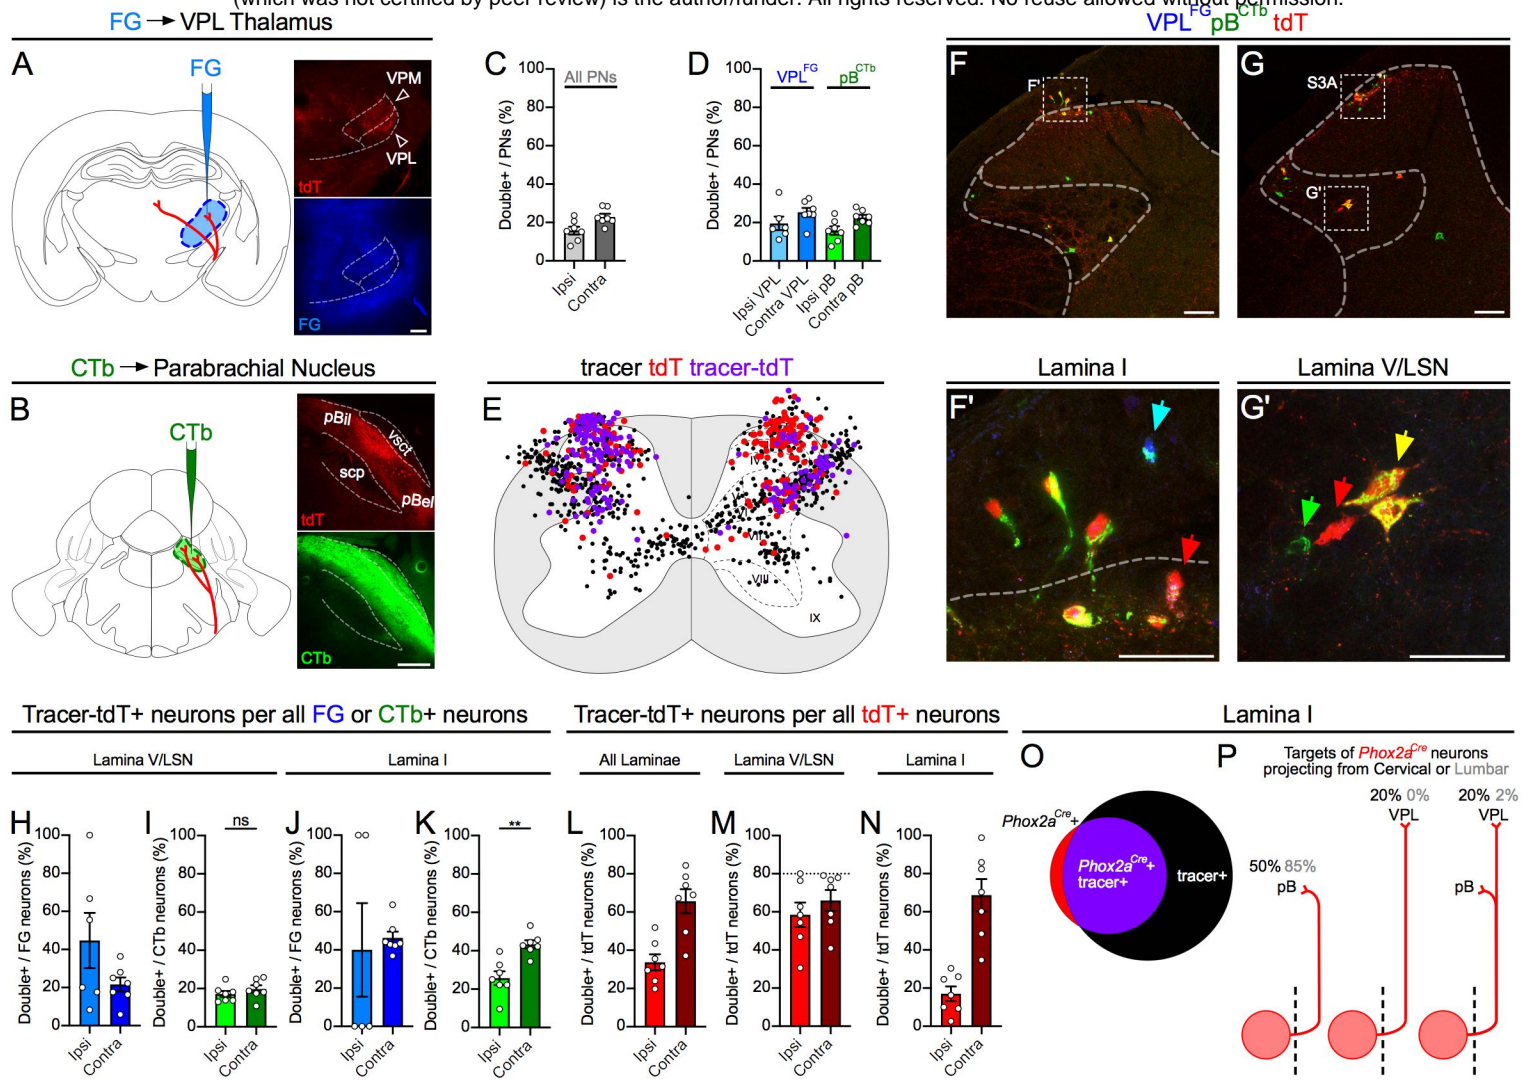

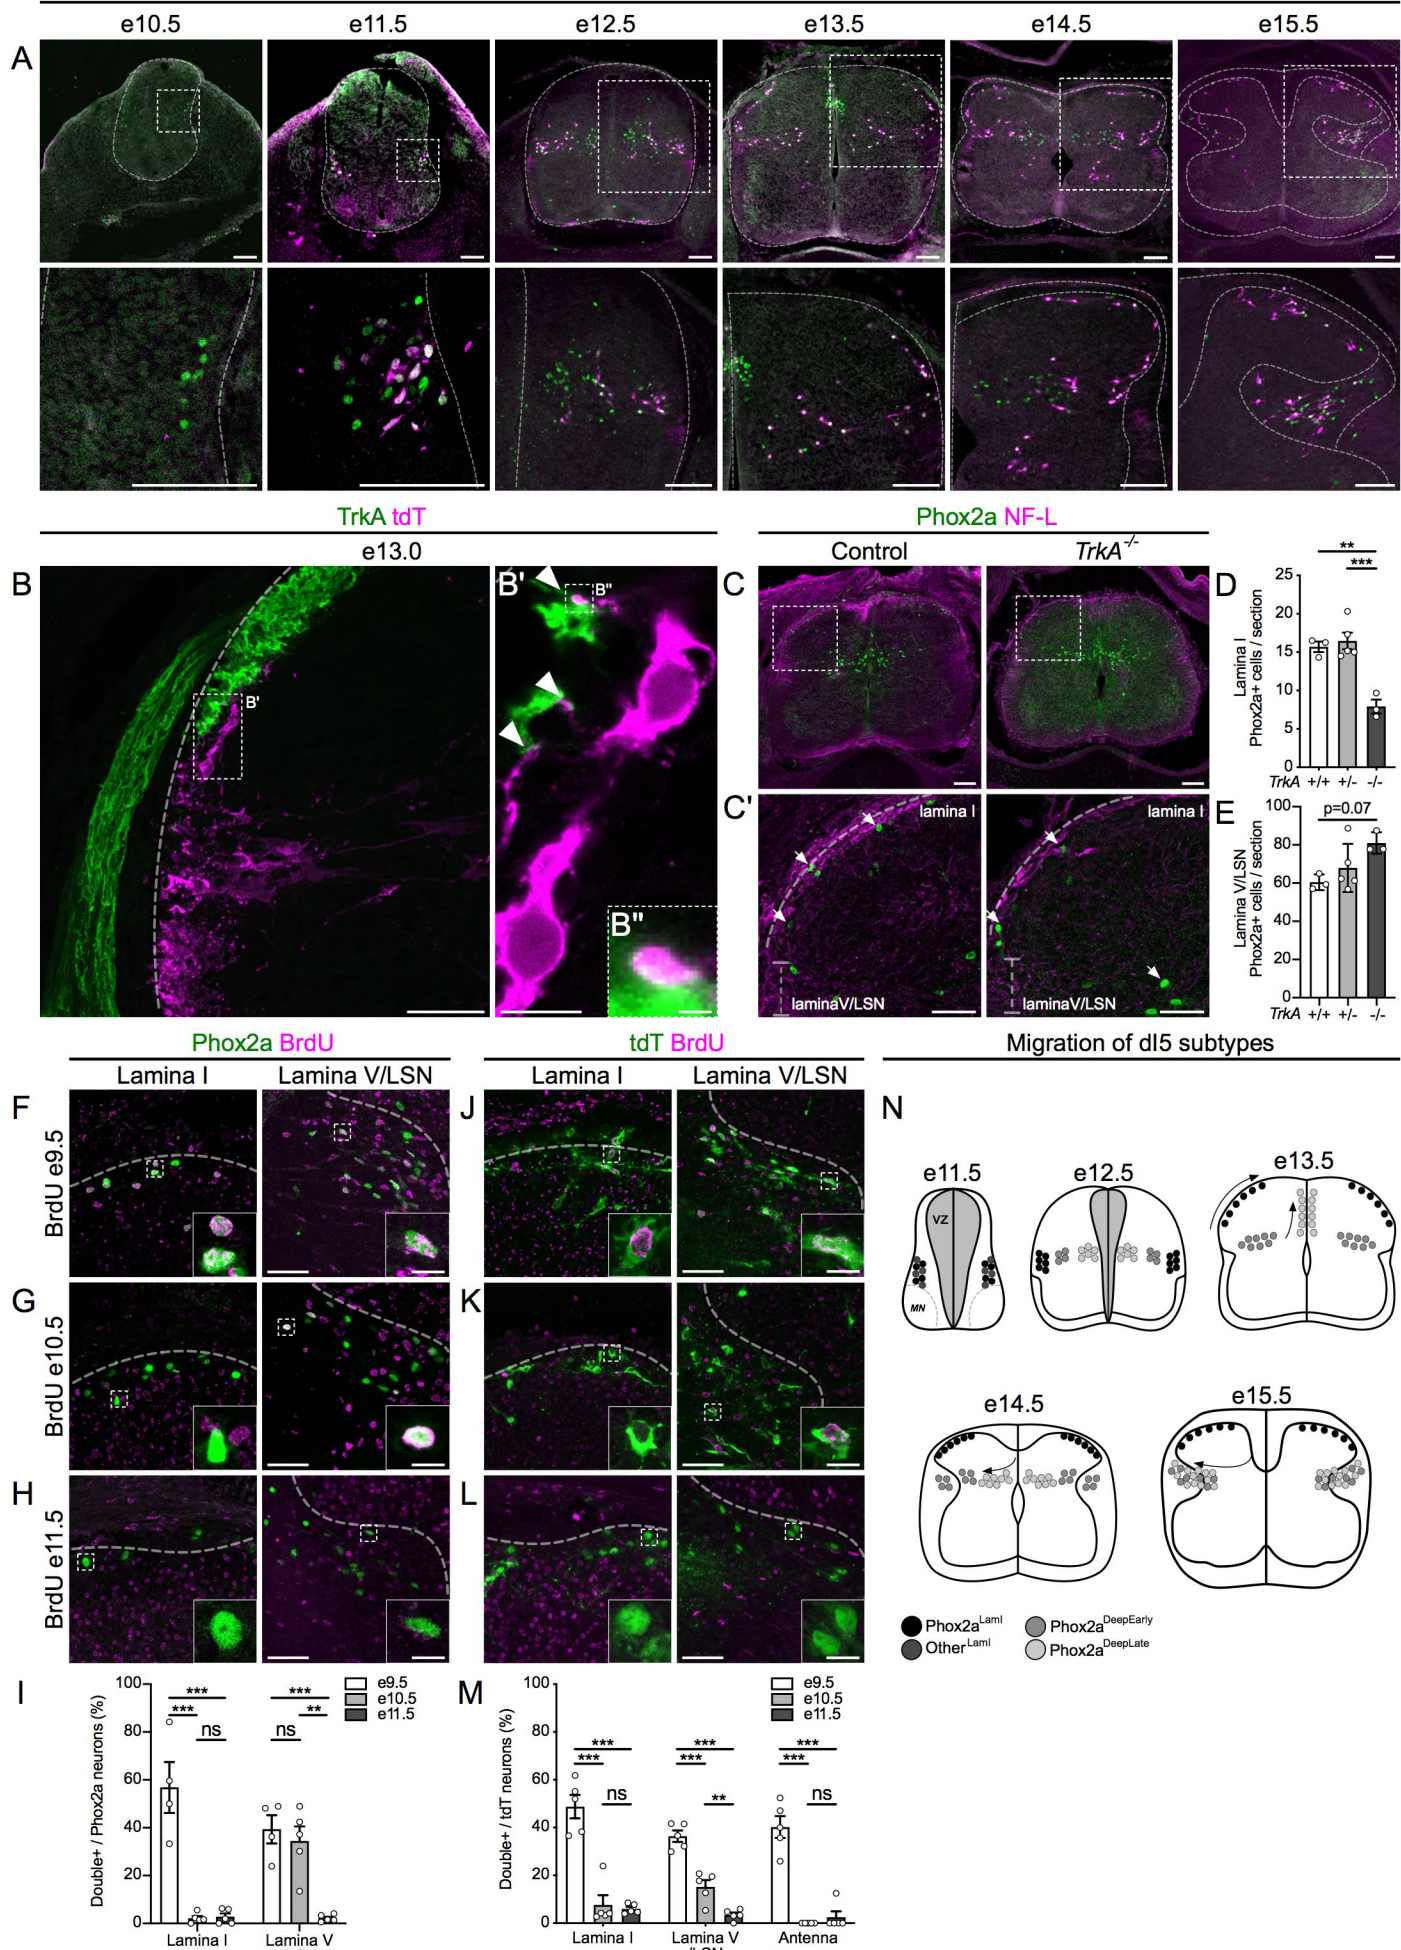

Molecular characterization of spinal Phox2a neurons - e10.5 spinal cord

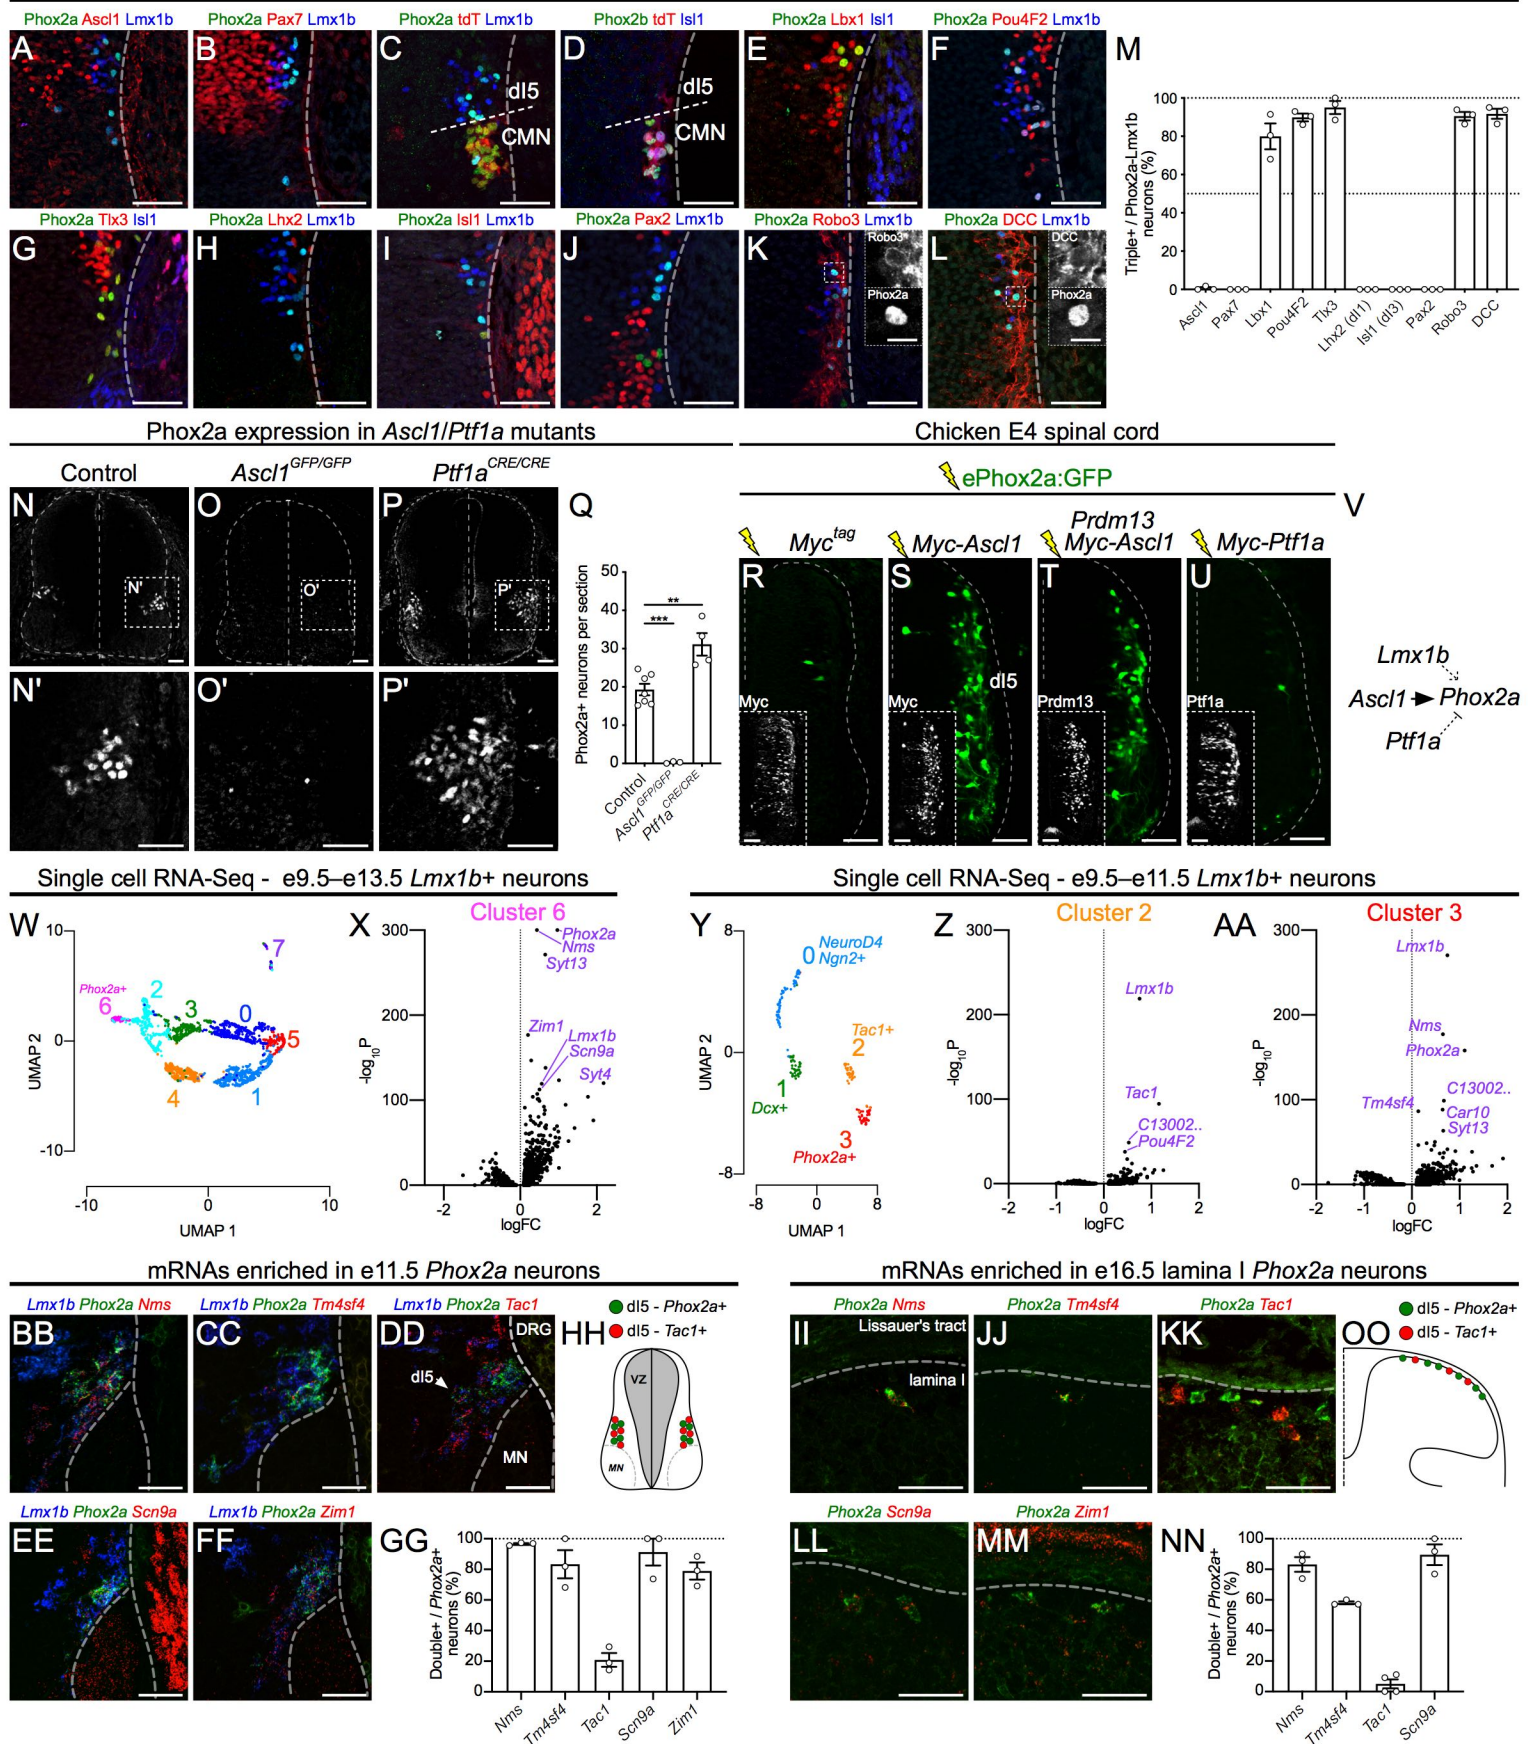

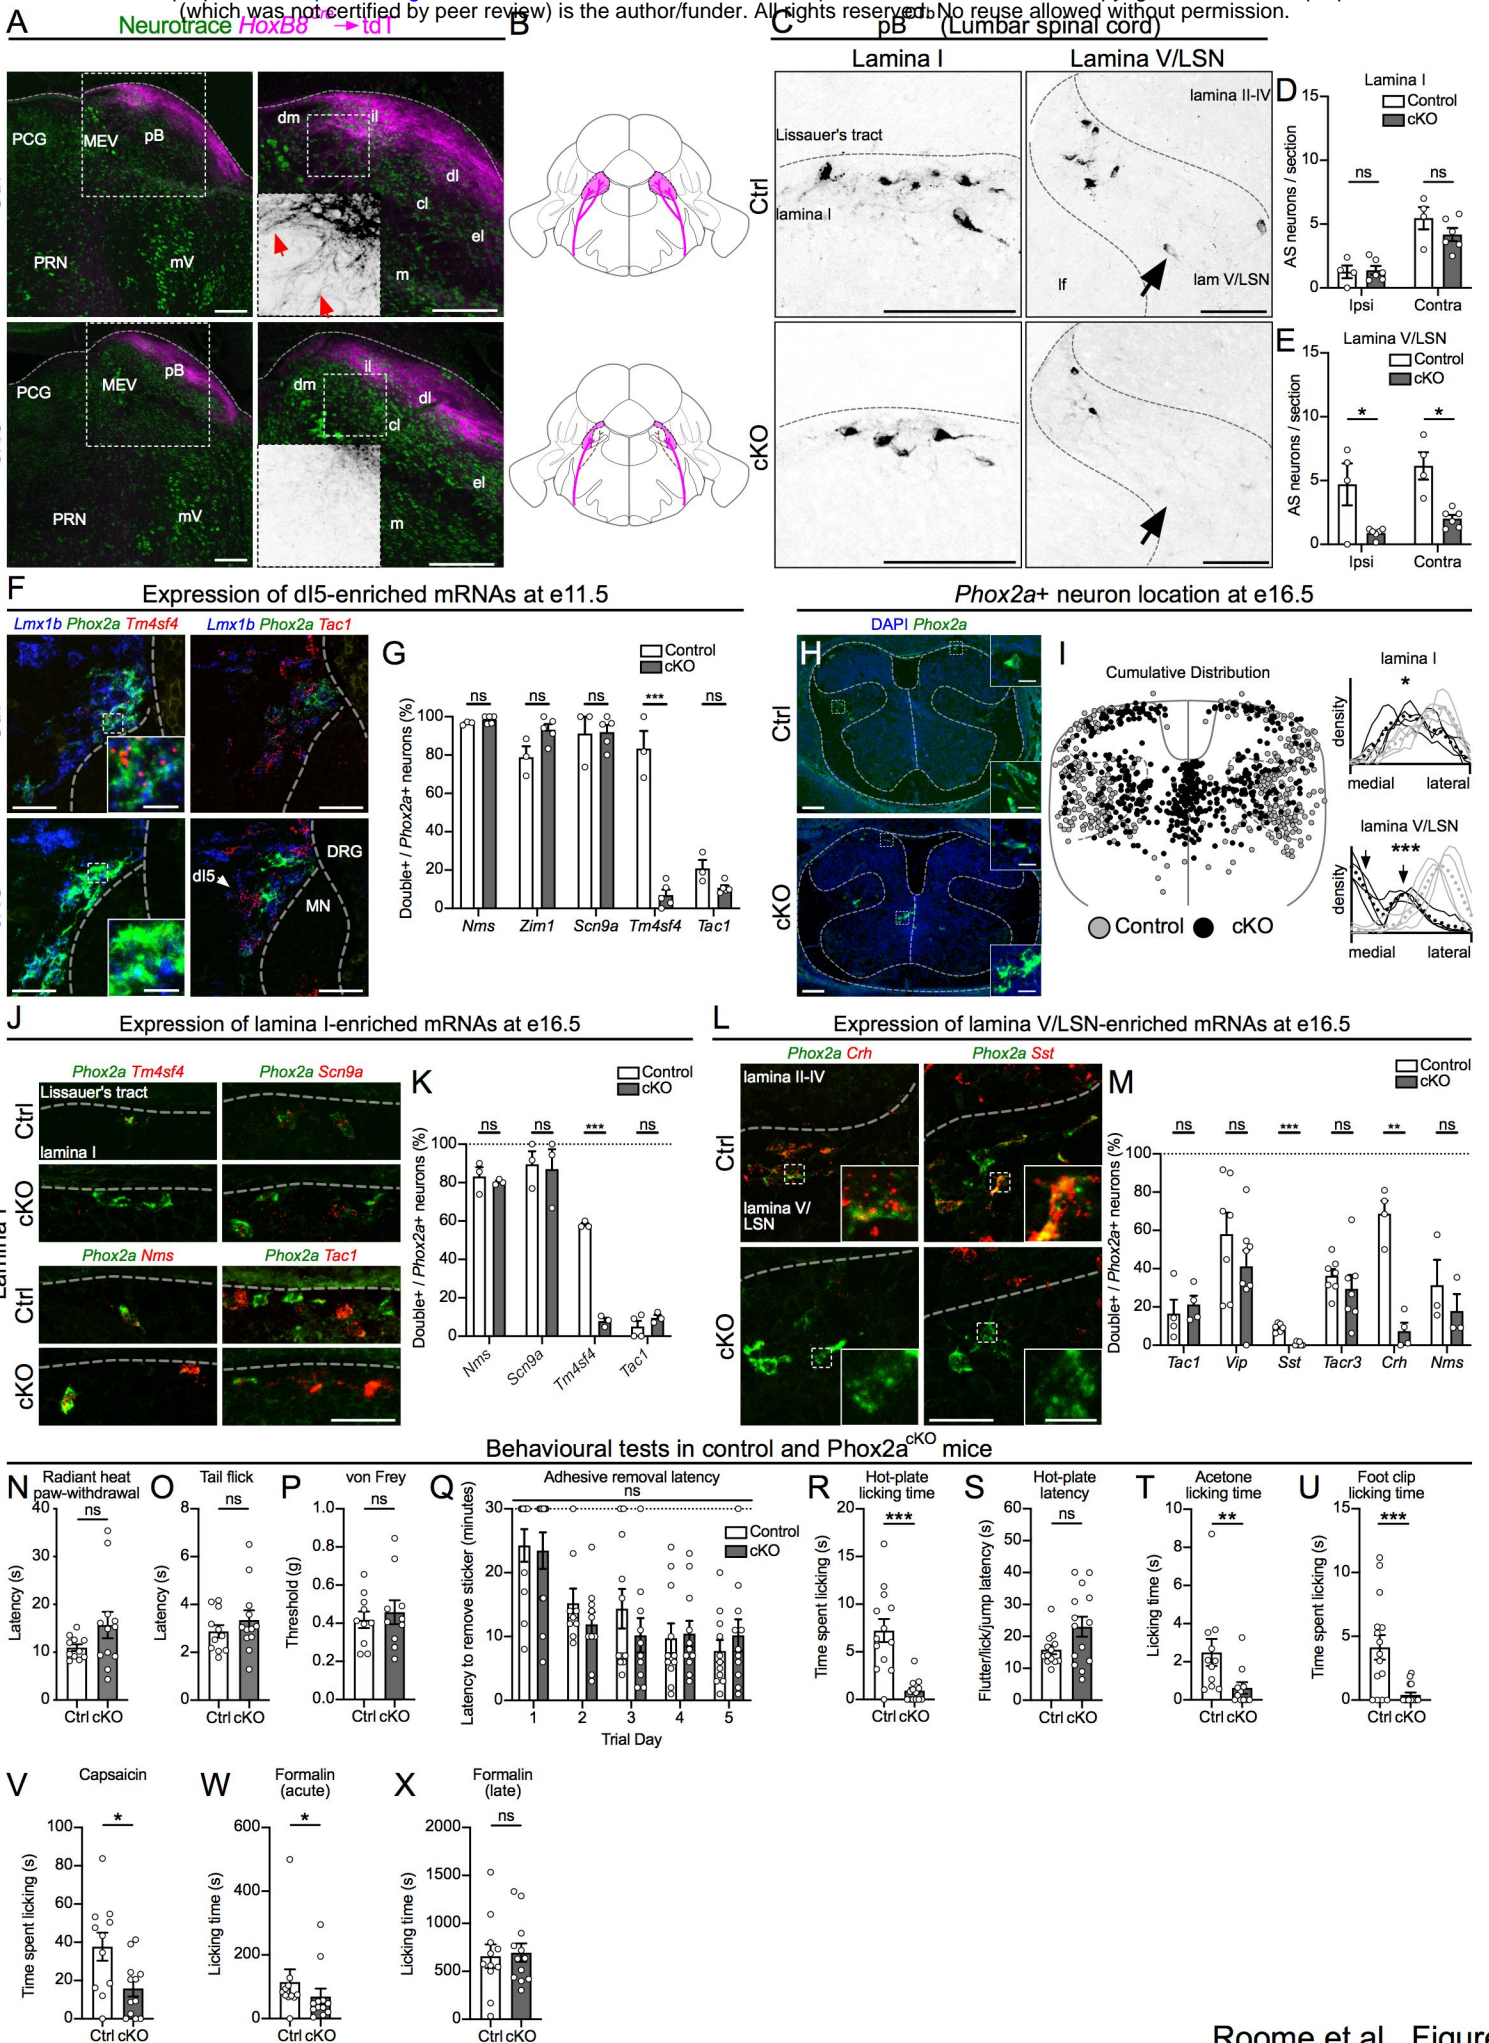

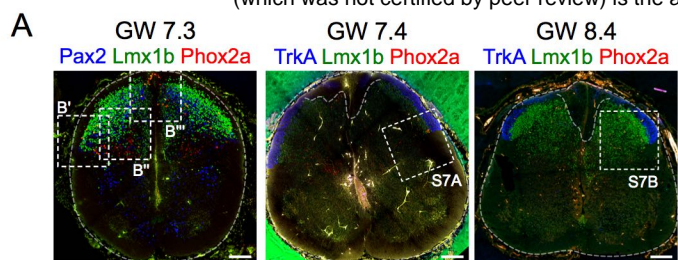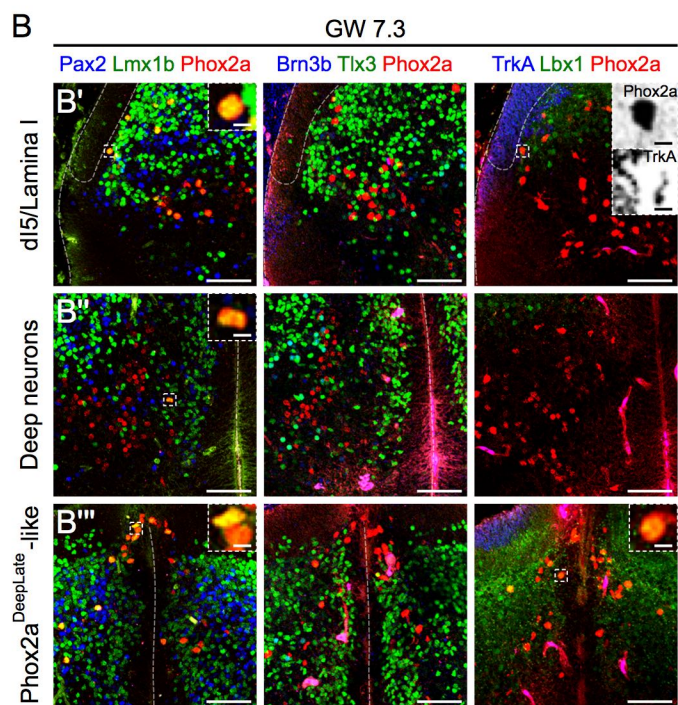

Source: https://www.biorxiv.org/content/10.1101/2020.06.10.144659v1.full.pdf
